# Supplementary material for: Simultaneous discovery of chiral and achiral dyes: elucidating the optical functions of helical and flag-hinged boron tetradentate complexes
Source: Royal Society of Chemistry journal article supplement (doi:10.1039/d4dt01172d), 2024-01-01
Supplement: d4dt01172d1.pdf [file d4dt01172d1.pdf]

## Supporting Information

### **Simultaneous Discovery of Chiral and Achiral Dyes: Elucidating Optical Functions of Helical and Flag-Hinged Boron-Tetradentate Complexes**

**Luxia Cui,<sup>[a]</sup> Ryoji Furuta,<sup>[a]</sup> Takunori Harada,<sup>[b]</sup> Takeru Konta,<sup>[b]</sup> Yu Hoshino,<sup>[a, c]</sup> and Toshikazu Ono\*<sup>[a, c]</sup>**

[a] Department of Chemistry and Biochemistry, Graduate School of Engineering, Kyushu University  
744 Motooka, Nishi-ku, Fukuoka 819-0395, Japan. E-mail: [tono@mail.cstm.kyushu-u.ac.jp](mailto:tono@mail.cstm.kyushu-u.ac.jp).

[b] Faculty of Science and Technology, Graduate School of Engineering, Oita University 700  
Dannoharu, Oita City 870-1192, Japan.

[c] Center for Molecular Systems (CMS), Kyushu University 744 Motooka, Nishi-ku, Fukuoka 819-  
0395, Japan.

## Materials and measurements

All chemical reagents and solvents used in this study were obtained from commercial sources and used as received unless otherwise stated. The NMR spectra ( $^1\text{H}$ ,  $^{13}\text{C}$ ,  $^{19}\text{F}$ , and  $^{11}\text{B}$  NMR) were recorded by using a Bruker Avance 400 NMR spectrometer. The chemical shifts (in ppm) of  $^1\text{H}$  NMR were referenced relative to tetramethylsilane ( $(\text{CH}_3)_4\text{Si}$ ), with the residual solvent peak of dimethyl sulfoxide- $d_6$  ( $\text{DMSO-}d_6$ ) at 2.50 ppm, chloroform- $d$  ( $\text{CDCl}_3$ ) at 7.26 ppm or dichloromethane- $d_2$  ( $\text{CD}_2\text{Cl}_2$ ) at 5.32 ppm, as an internal standard, respectively. The chemical shifts (in ppm) of  $^{13}\text{C}$  NMR were referenced relative to the residual solvent peak of  $\text{CDCl}_3$  at 77.2 ppm or  $\text{CD}_2\text{Cl}_2$  at 53.8 ppm. The chemical shifts (in ppm) of  $^{19}\text{F}$  and  $^{11}\text{B}$  NMR were referenced relative to hexafluorobenzene ( $\text{C}_6\text{F}_6$ ) at  $-162.90$  ppm and boron trifluoride-ethyl ether complex ( $\text{BF}_3\cdot\text{OEt}_2$ ) at 0.0 ppm in  $\text{CDCl}_3$  or  $\text{CD}_2\text{Cl}_2$ , respectively. The coupling constants,  $J$  are reported in Hertz (Hz). Multiplicity is abbreviated as follows: s = singlet, d = doublet, t = triplet, m = multiplet, and dd = double doublet. The high-resolution mass spectra (HRMS, FAB-MS) were performed with a JEOL JMS-700 instrument. Melting points (m.p.) were measured with a DTM-01 melting point meter (AS ONE Corporation). UV-vis absorption spectra were recorded using a Hitachi U-3900H spectrophotometer. Fluorescence excitation and emission spectra were collected on a Hitachi F-7000 fluorescence spectrophotometer at room temperature or 77 K (liquid  $\text{N}_2$ ). Emission spectra were collected in the range between 300-800 nm, with a scan speed of 240 nm/min, and the slits were set at 5.0 nm (excitation slit) and 5.0 nm (emission slit). The absolute photoluminescence quantum yields ( $\Phi_{\text{PL}}$ ) were determined using absolute PL quantum yields measurement system C9920-02 (Hamamatsu photonics) after excitation at maximum absorption wavelength ( $\lambda_{\text{abs}}^{\text{max}}$ ). Time-resolved photoluminescence lifetimes were carried out by using time-correlated single photon counting lifetime spectroscopy system, Quantaaurus-Tau C11367-05 (Hamamatsu photonics). The decay constants and fitting parameters ( $\tau_1$ ,  $\tau_2$ ,  $A_1$ ,  $A_2$ ) for transient decays were determined using the embedded software of Quantaaurus-Tau. Circular Dichroism (CD) spectra were recorded on JASCO J-1500 spectrometer at 25°C. Circularly polarized luminescence (CPL) and DC (= nonpolarized fluorescence) spectra were measured by using a Comprehensive Chiroptical Spectrophotometer (CCS) equipped with Stokes-Mueller matrix analysis system. The excitation wavelength was set to 330 nm and the emission wavelengths were recorded over a wavelength range of 800–300 nm with 33 mm slit width and 10 nm spectral bandwidth for the excitation and emission monochromators, respectively. All the products were isolated by silica-gel column chromatography (Kanto Chemicals, 60N); and then isolated products were identified by HRMS (FAB-MS),  $^1\text{H}$ ,  $^{13}\text{C}$ ,  $^{19}\text{F}$ , and  $^{11}\text{B}$  NMR.

(1) Synthesis of compound 6,6'-dihydrazineyl-2,2'-bipyridine<sup>1</sup>

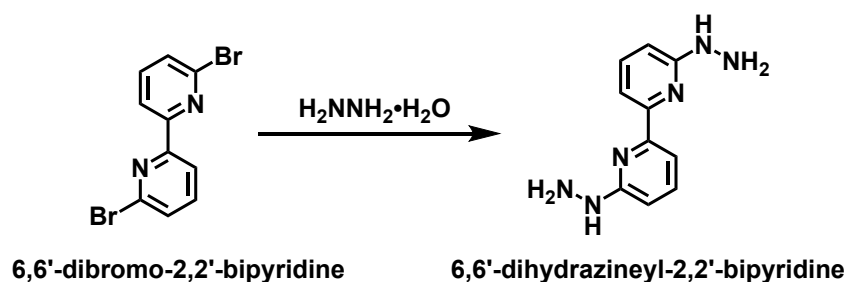

**Scheme S1.** Synthesis of compound 6,6'-dihydrazineyl-2,2'-bipyridine.

Compound 6,6'-dibromo-2,2'-bipyridine (1 g, 3.18 mmol) was suspended in 40 mL of hydrazine monohydrate ( $\text{N}_2\text{H}_4 \cdot \text{H}_2\text{O}$ ) under a nitrogen atmosphere. The reaction mixture was then heated to dissolve 6,6'-dibromo-2,2'-bipyridine and refluxed at 120 °C for 6 hours. After cooling to room temperature, the resulting precipitate was collected and washed with a small amount of water. Finally, the desired product 6,6'-dihydrazineyl-2,2'-bipyridine was obtained as a yellow solid (0.65 g, 90 %).

$^1\text{H}$  NMR (400 MHz,  $\text{DMSO}-d_6$ ):  $\delta$  = 7.59-7.52 (m, 4H), 7.39 (s, 2H), 6.70 (dd,  $J$  = 7.9, 1.1 Hz, 2H), 4.15 (brs, 4H).

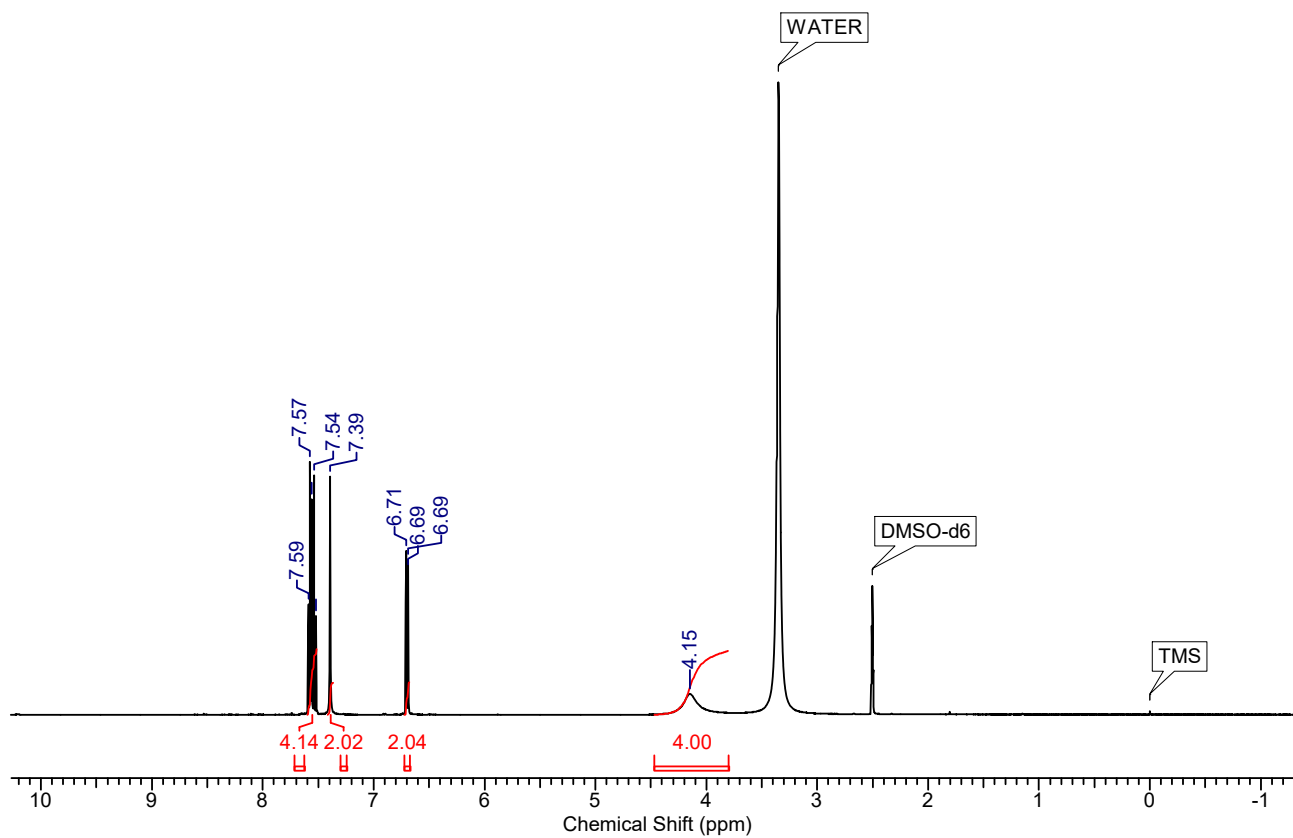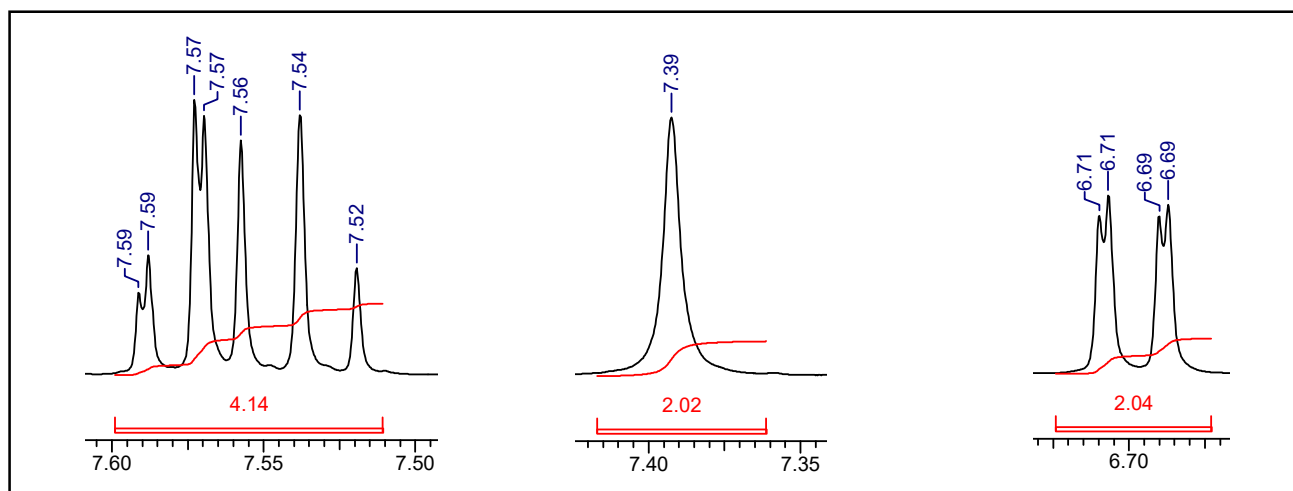

**Figure S1.** <sup>1</sup>H NMR spectrum of compound 6,6'-dihydrazineyl-2,2'-bipyridine in DMSO-*d*<sub>6</sub> at room temperature.

## General procedure

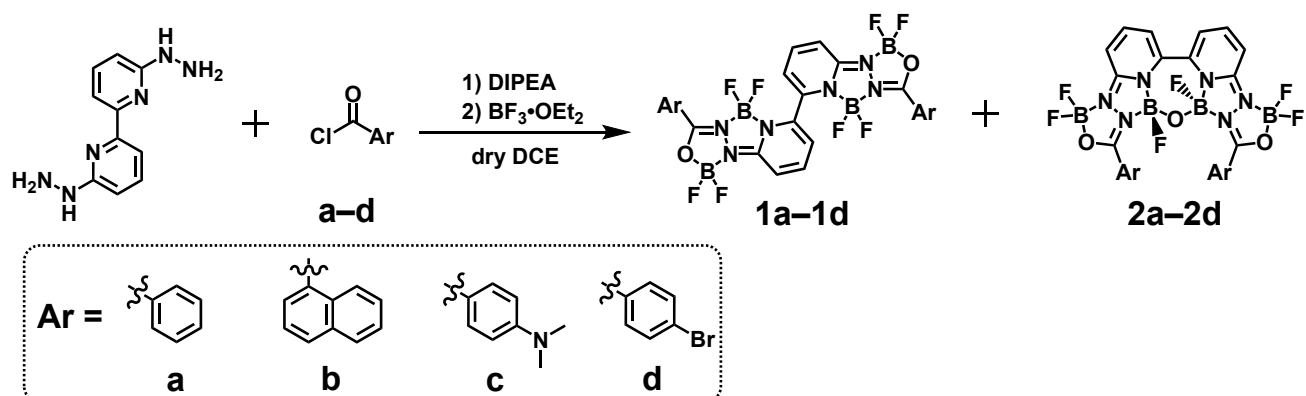

Scheme S2. Synthesis of **1a–1d** and **2a–2d** in this work.

To 6,6'-dihydrazineyl-2,2'-bipyridine (108 mg, 0.5 mmol) suspended in dry 1,2-dichloroethane (DCE, 60 mL), *N,N*-diisopropylethylamine (DIPEA, 2 mL, 12 mmol) was slowly added under a nitrogen atmosphere. Subsequently, acyl chloride derivatives (**a–d**, 1.1 mmol) in 10 mL of dry DCE were then added dropwise in an ice-water bath and stirred for 0.5 h. The reaction mixture was then stirred for 1 h at r.t. before subsequent addition of  $\text{BF}_3 \cdot \text{OEt}_2$  (3 mL, 24 mmol) in an ice-water bath, and further refluxed at 90 °C for 4 h under a nitrogen atmosphere. After that, the dichloromethane (DCM, 40 mL) was added into the cooled reaction mixture. The mixture was poured into water (100 mL) and extracted with DCM. The extracted organic layer was washed with water, dried over anhydrous sodium sulphate ( $\text{Na}_2\text{SO}_4$ ), and concentrated under reduced pressure to obtain the crude product. The crude product was then purified by silica-gel column chromatography using DCM and hexane as eluent. The corresponding pure products were finally obtained by recrystallization from dichloromethane and hexane.

### Chemical structures of **1a–1d** and **2a–2d**

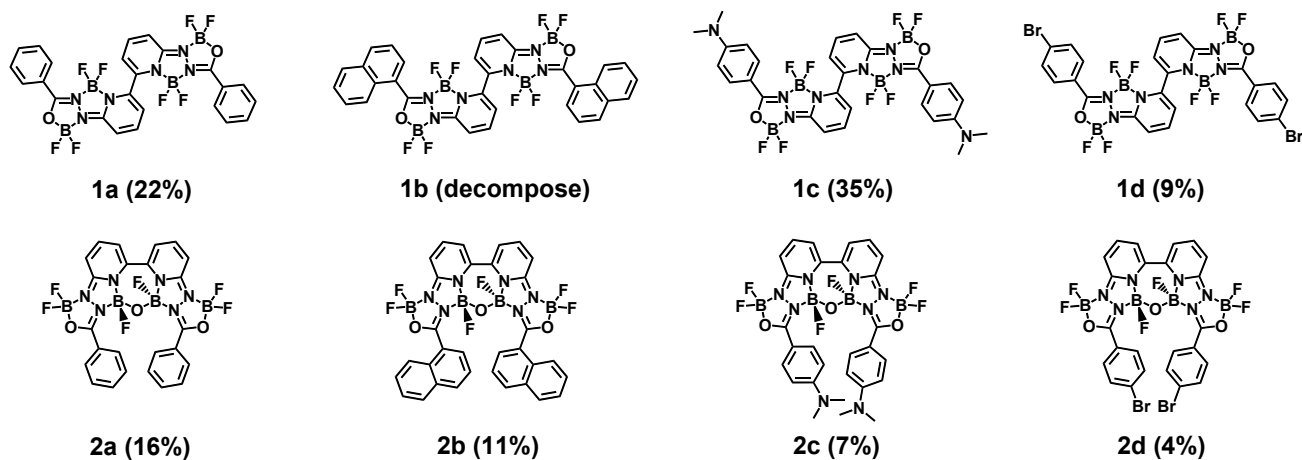

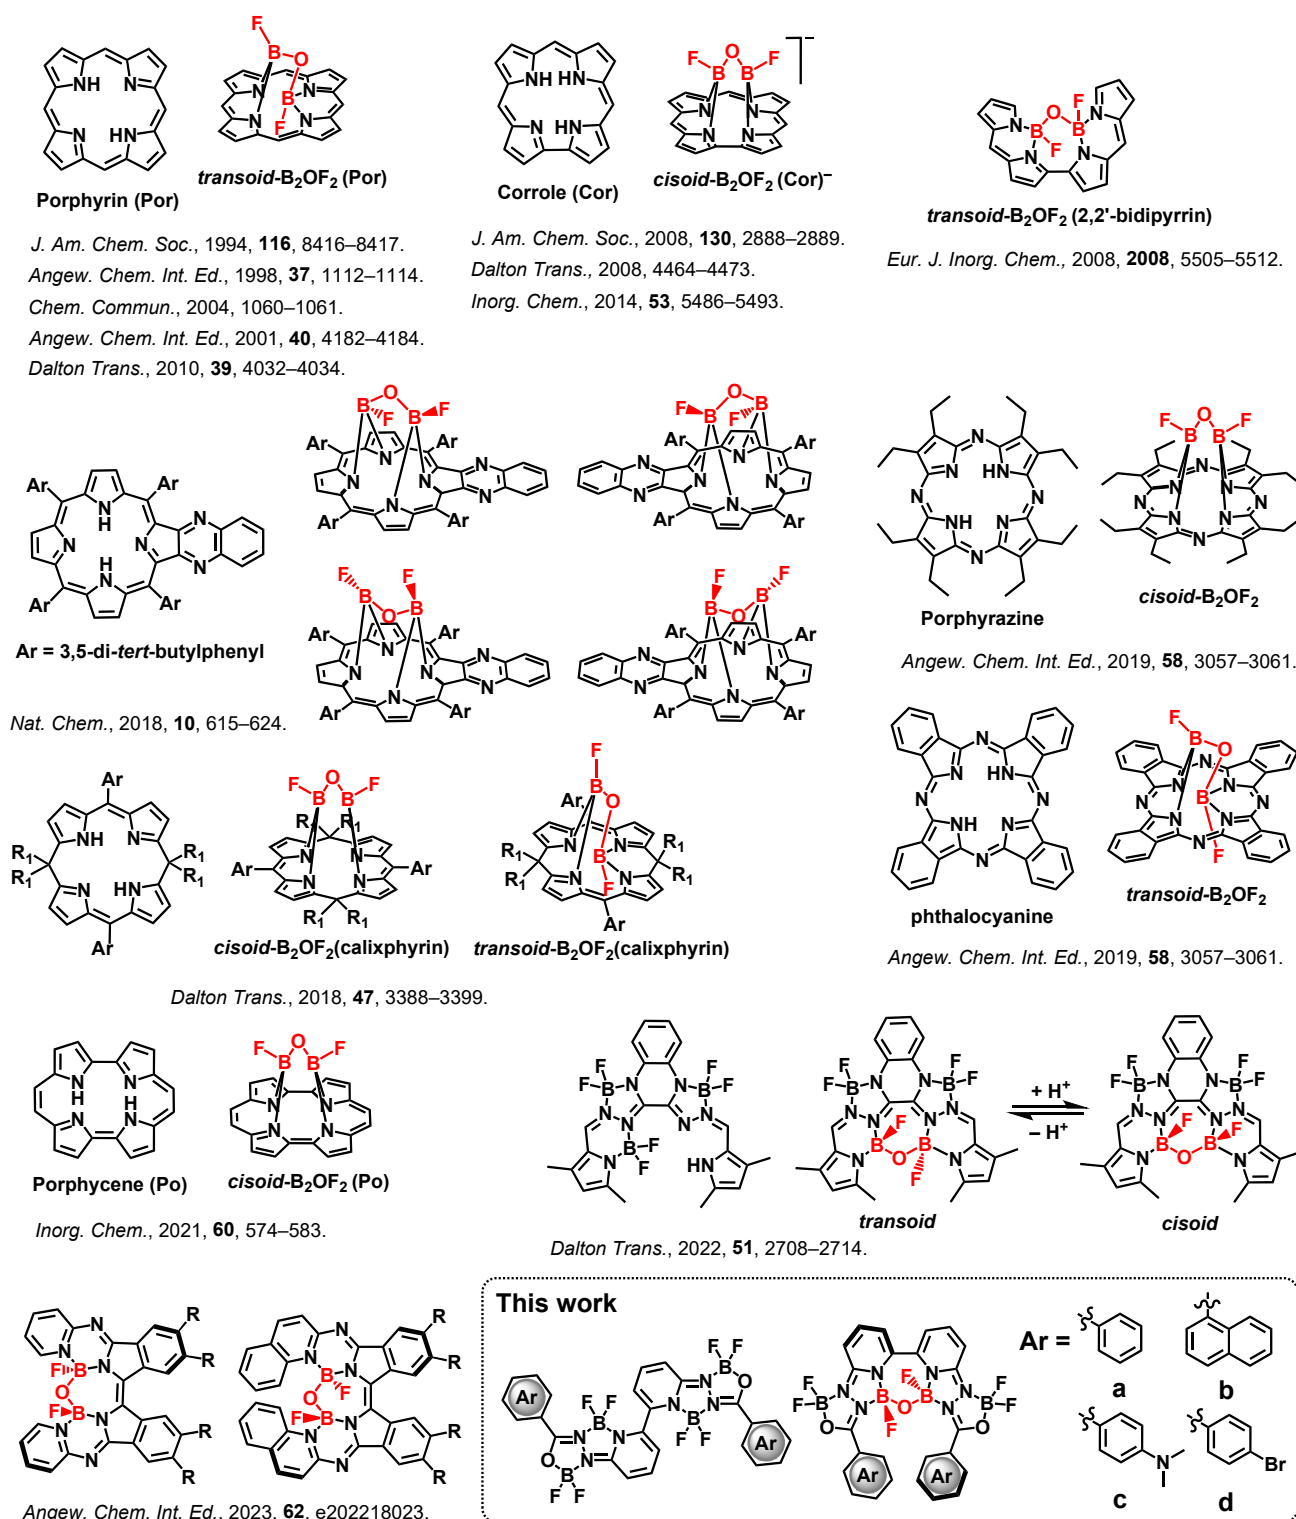

**Scheme S3.** Chemical structures of previously reported FB–O–BF bridged organoboron complexes based on various ligands and developed organoboron complexes in this work.

## Synthesis of compounds **1a** and **2a**

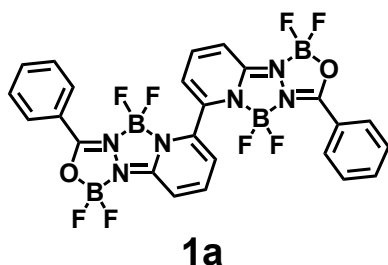

The reaction was performed following the general procedure starting with 6,6'-dihydrazineyl-2,2'-bipyridine (108 mg, 0.5 mmol) and benzoyl chloride (155 mg, 1.1 mmol). Compound **1a** was obtained as a yellow solid (66 mg, 22 %).

m.p. > 300°C.

$^1\text{H}$  NMR (400 MHz,  $\text{CDCl}_3$ ):  $\delta$  = 8.10-8.09 (m, 2H), 8.08-8.07 (m, 2H), 7.96 (m, 2H), 7.65 (m, 2H), 7.50 (m, 4H), 7.23 (d,  $J$  = 9.5 Hz, 2H), 7.06 (d,  $J$  = 7.5 Hz, 2H).

$^{13}\text{C}$  NMR (101 MHz,  $\text{CDCl}_3$ ): No analyzable  $^{13}\text{C}$  spectrum could be recorded due to the low solubility.

$^{19}\text{F}$  NMR (377 MHz,  $\text{CDCl}_3$ ):  $\delta$  = (-131.25)-(-131.59) (m, 2F), (-143.40)-(-143.55) (m, 2F), (-145.92)-(-146.14) (m, 2F), (-147.43)-(-147.63) (m, 2F).

$^{11}\text{B}$  NMR (128 MHz,  $\text{CDCl}_3$ ): No analyzable  $^{11}\text{B}$  spectrum could be recorded due to the low solubility.

HRMS (FAB, positive):  $m/z$  calcd. for  $\text{C}_{24}\text{H}_{16}\text{B}_4\text{F}_8\text{N}_6\text{O}_2$   $[\text{M}]^+$  616.1579; found: 616.1579.

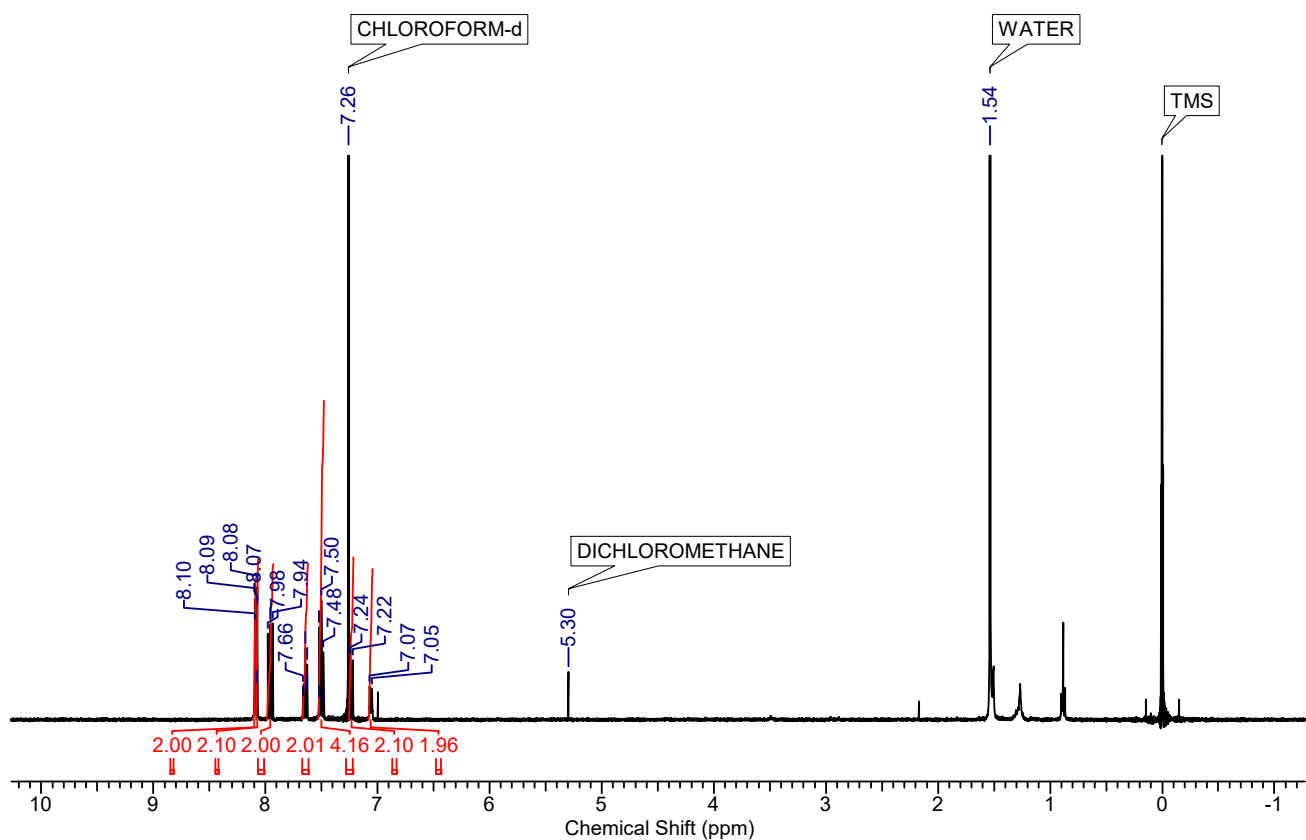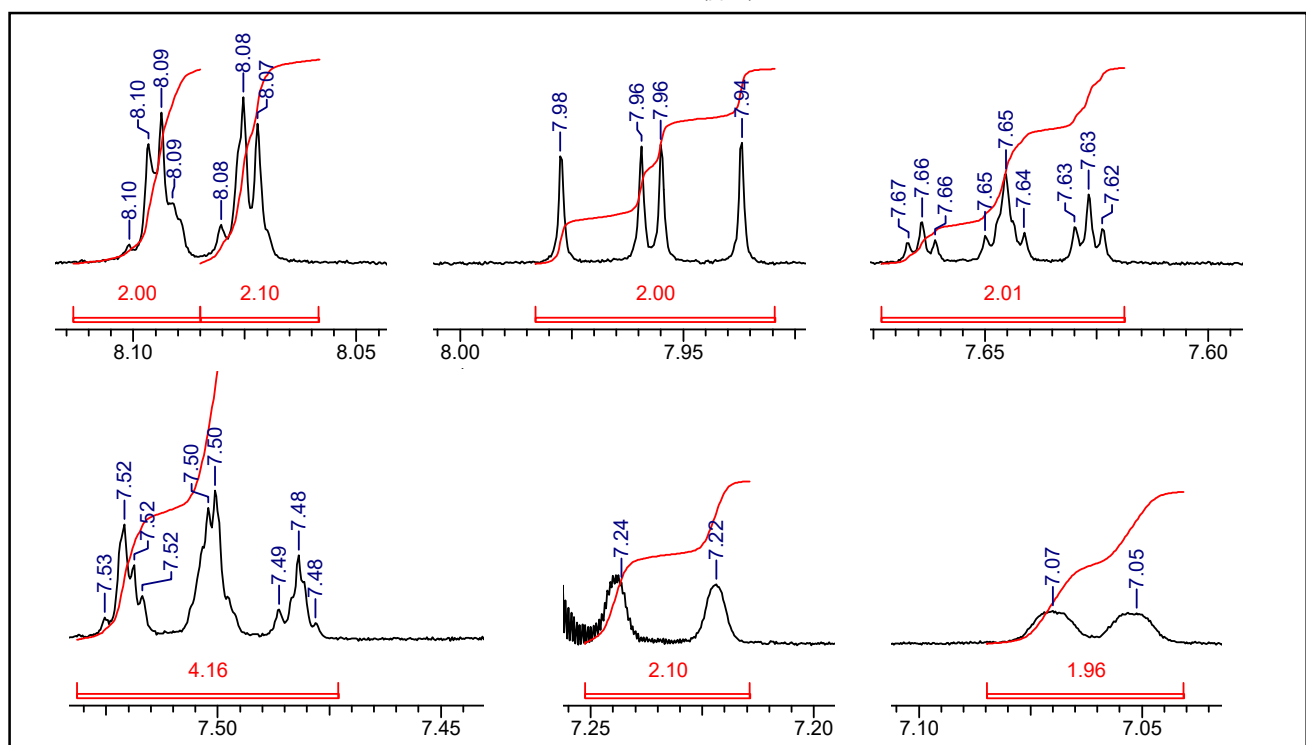

Figure S2-1.  $^1\text{H}$  NMR spectrum of compound **1a** in  $\text{CDCl}_3$  at room temperature.



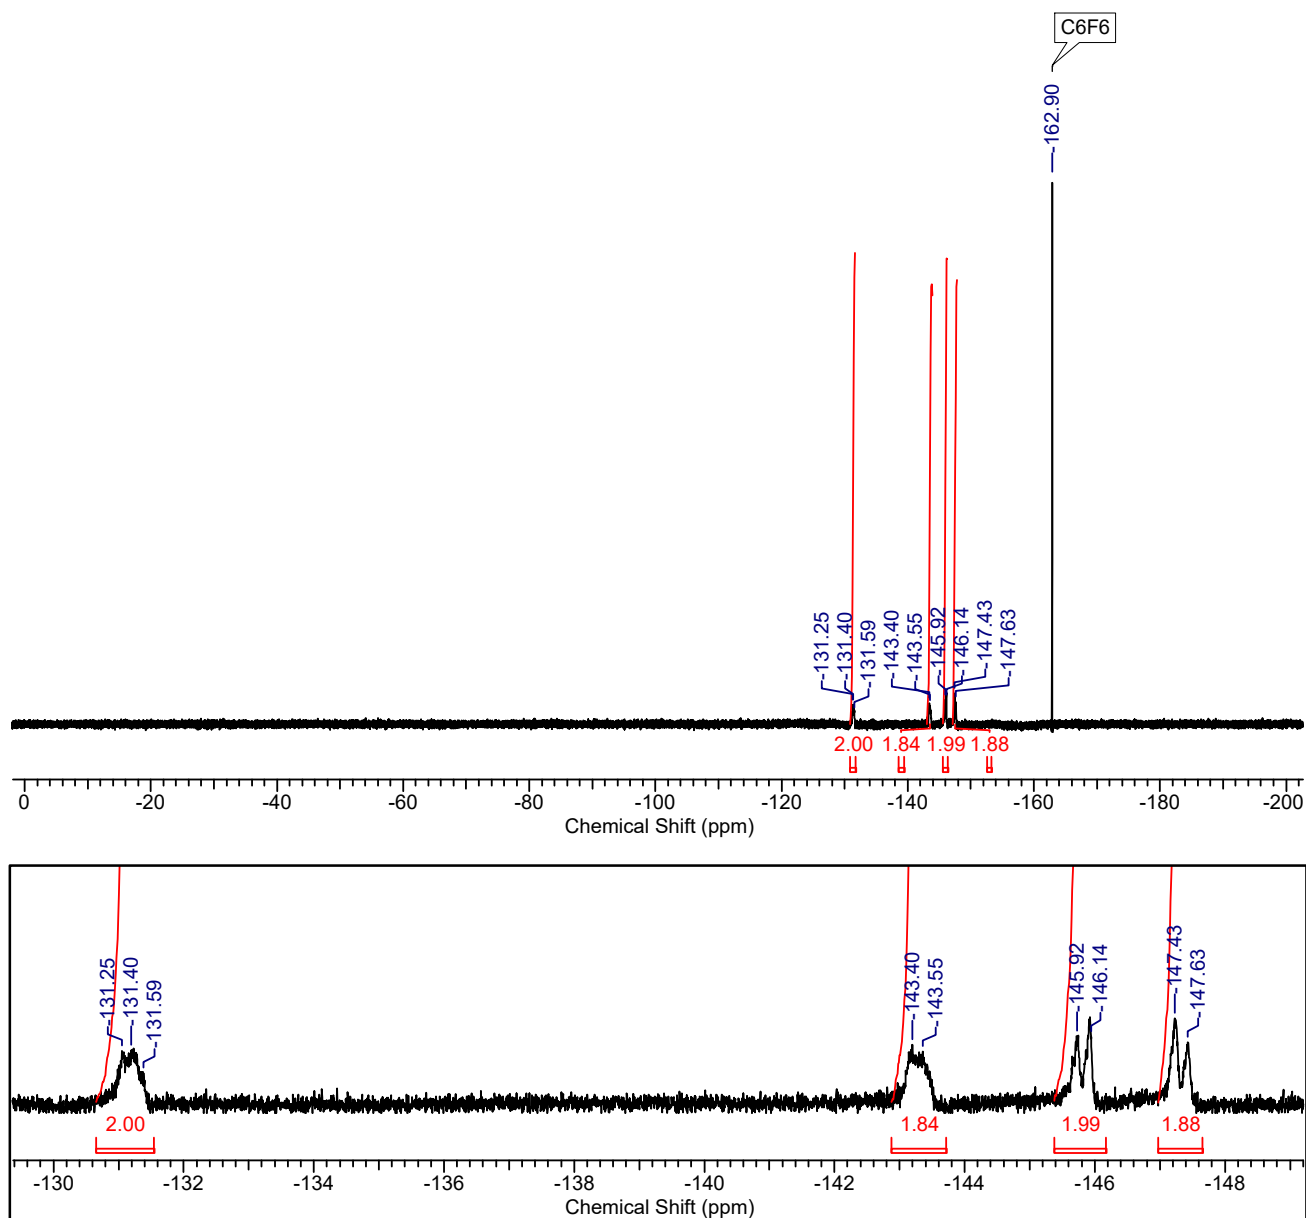

**Figure S2-2.**  $^{19}\text{F}$  NMR spectrum of compound **1a** in  $\text{CDCl}_3$  at room temperature.

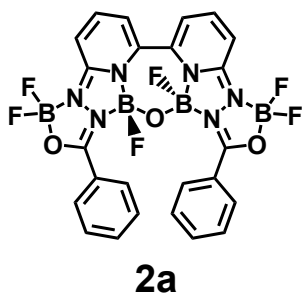

Following the synthesis procedure of compound **1a**, compound **2a** was simultaneously obtained as a yellow solid (47 mg, 16 %).

m.p. > 300°C.

<sup>1</sup>H NMR (400 MHz, CDCl<sub>3</sub>): δ = 8.11-8.10 (m, 2H), 8.09-8.08 (m, 2H), 7.92 (m, 2H), 7.42 (m, 2H), 7.23-7.18 (m, 6H), 7.10 (dd, *J* = 7.3, 0.9 Hz, 2H).

<sup>13</sup>C NMR (101 MHz, CDCl<sub>3</sub>): δ = 162.4, 150.1, 143.1, 142.3, 134.5, 129.6, 128.9, 123.0, 115.1, 111.2.

<sup>19</sup>F NMR (377 MHz, CDCl<sub>3</sub>): δ = -135.22 (s, 2F), -146.18 (m, 1F), -146.39 (m, 1F), -147.70 (m, 1F), -147.90 (s, 1F).

<sup>11</sup>B NMR (128 MHz, CDCl<sub>3</sub>): δ = 3.48 (brs).

HRMS (FAB, positive): *m/z* calcd. for C<sub>24</sub>H<sub>16</sub>B<sub>4</sub>F<sub>6</sub>N<sub>6</sub>O<sub>3</sub> [M]<sup>+</sup> 594.1560; found: 594.1559.

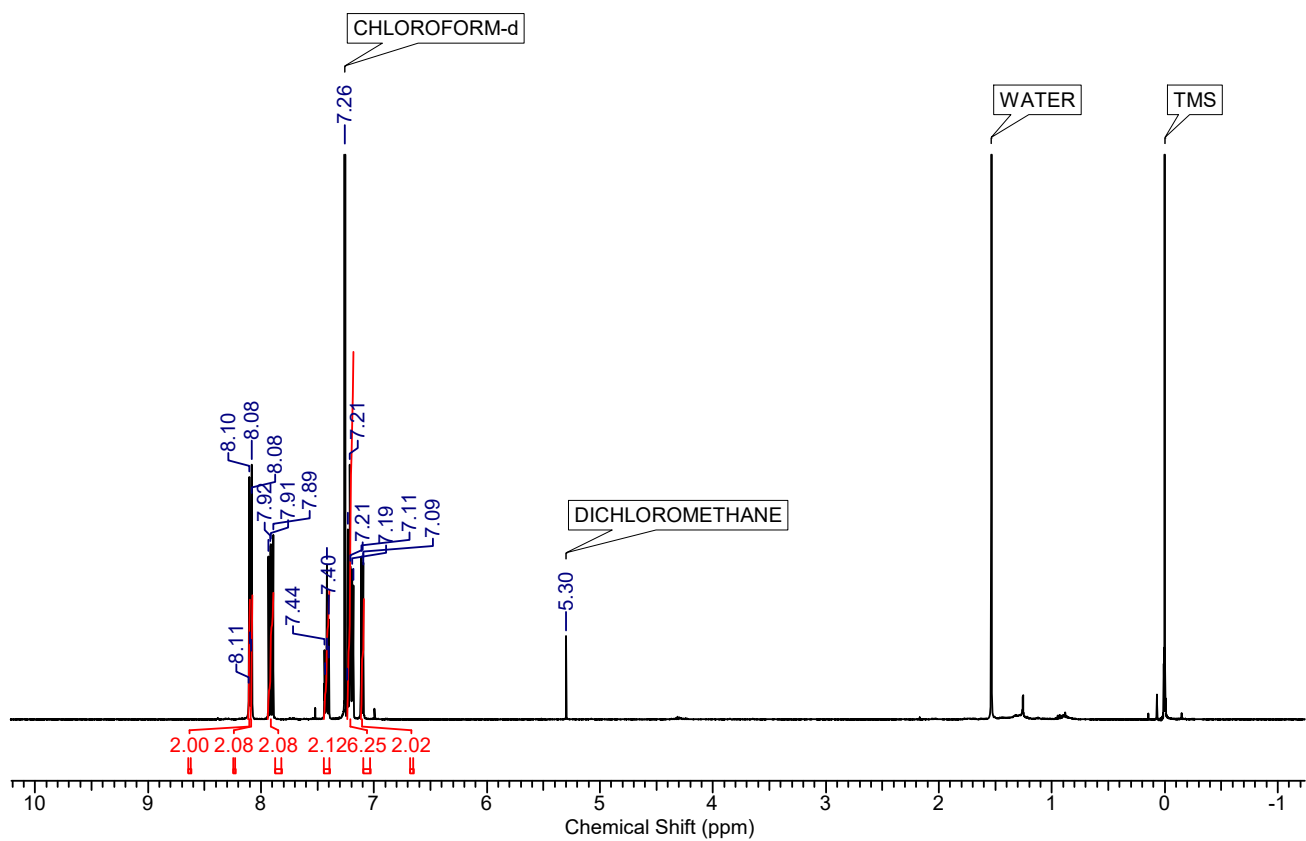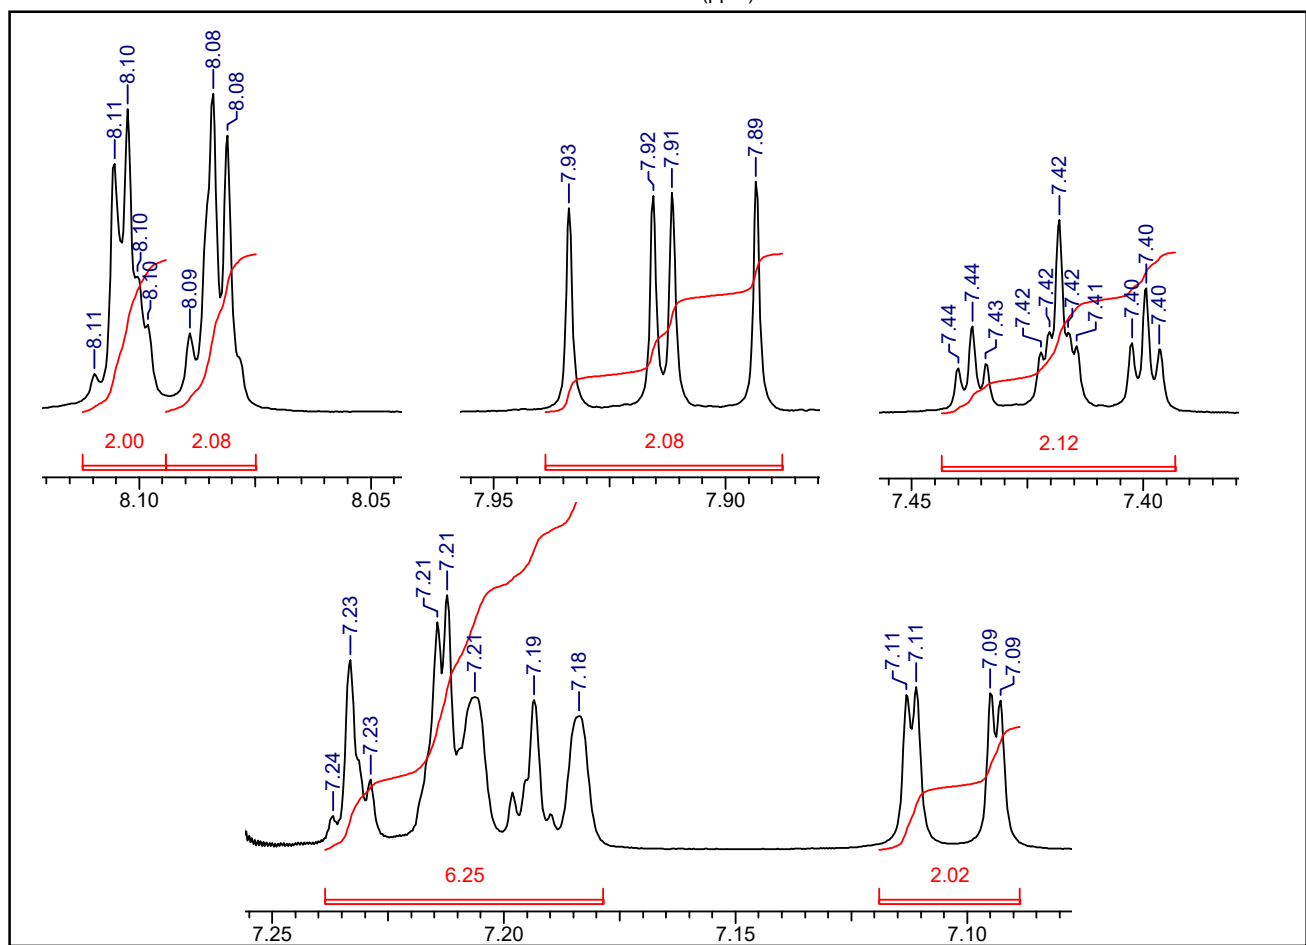

Figure S3-1.  $^1\text{H}$  NMR spectrum of compound **2a** in  $\text{CDCl}_3$  at room temperature.

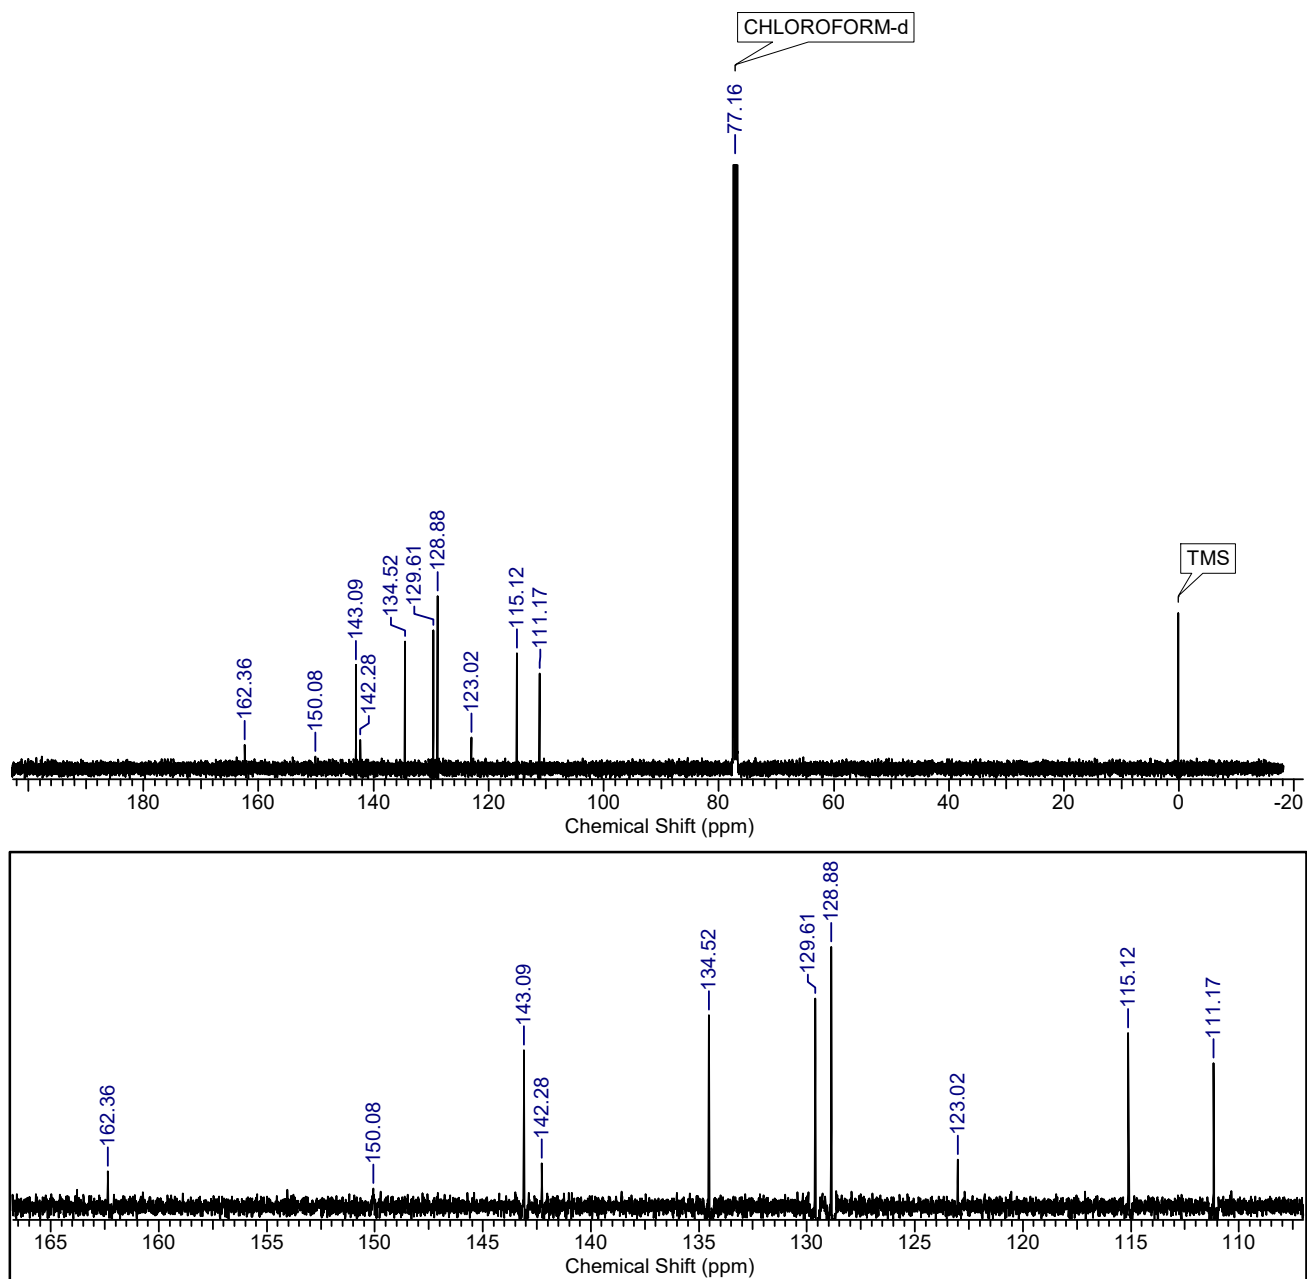

**Figure S3-2.**  $^{13}\text{C}$  NMR spectrum of compound **2a** in  $\text{CDCl}_3$  at room temperature.

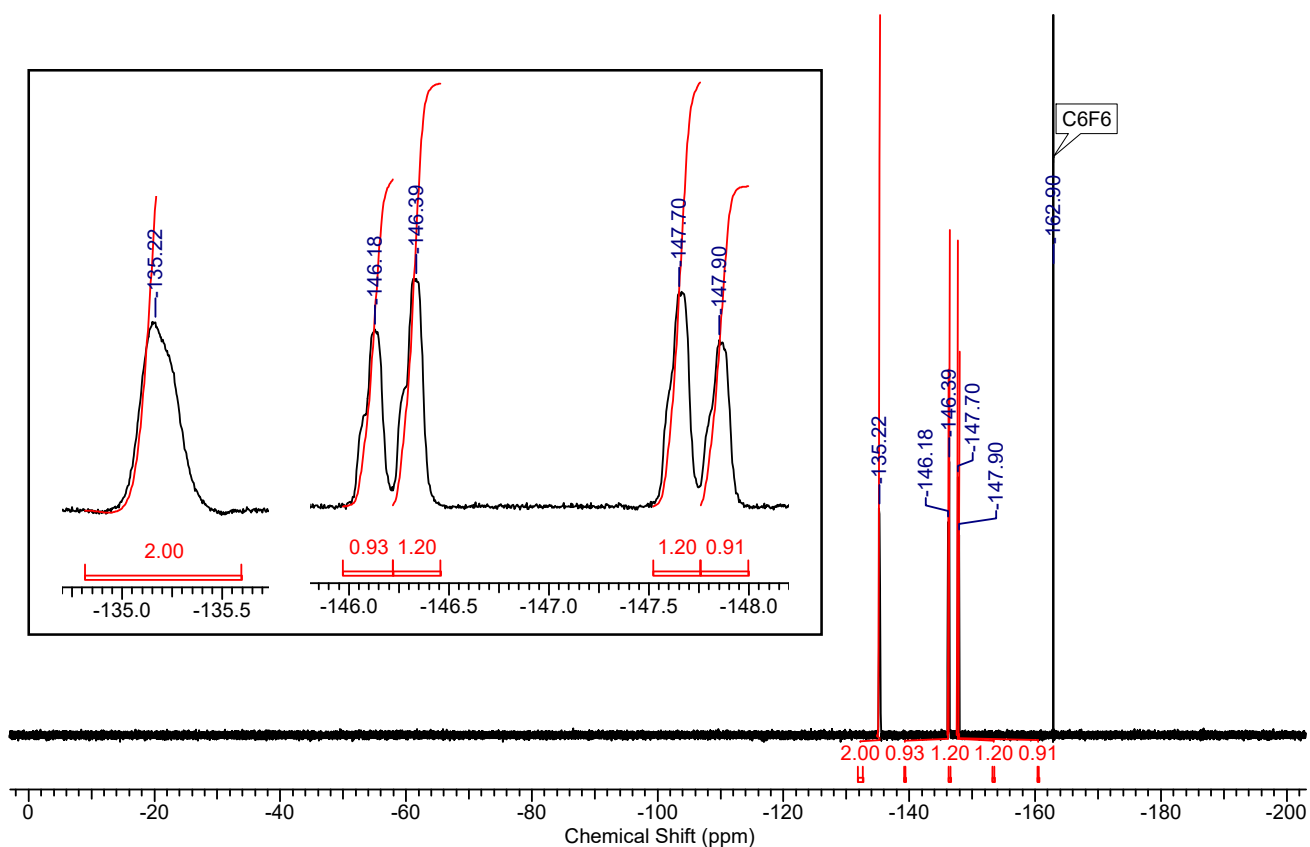

**Figure S3-3.**  $^{19}\text{F}$  NMR spectrum of compound **2a** in  $\text{CDCl}_3$  at room temperature.

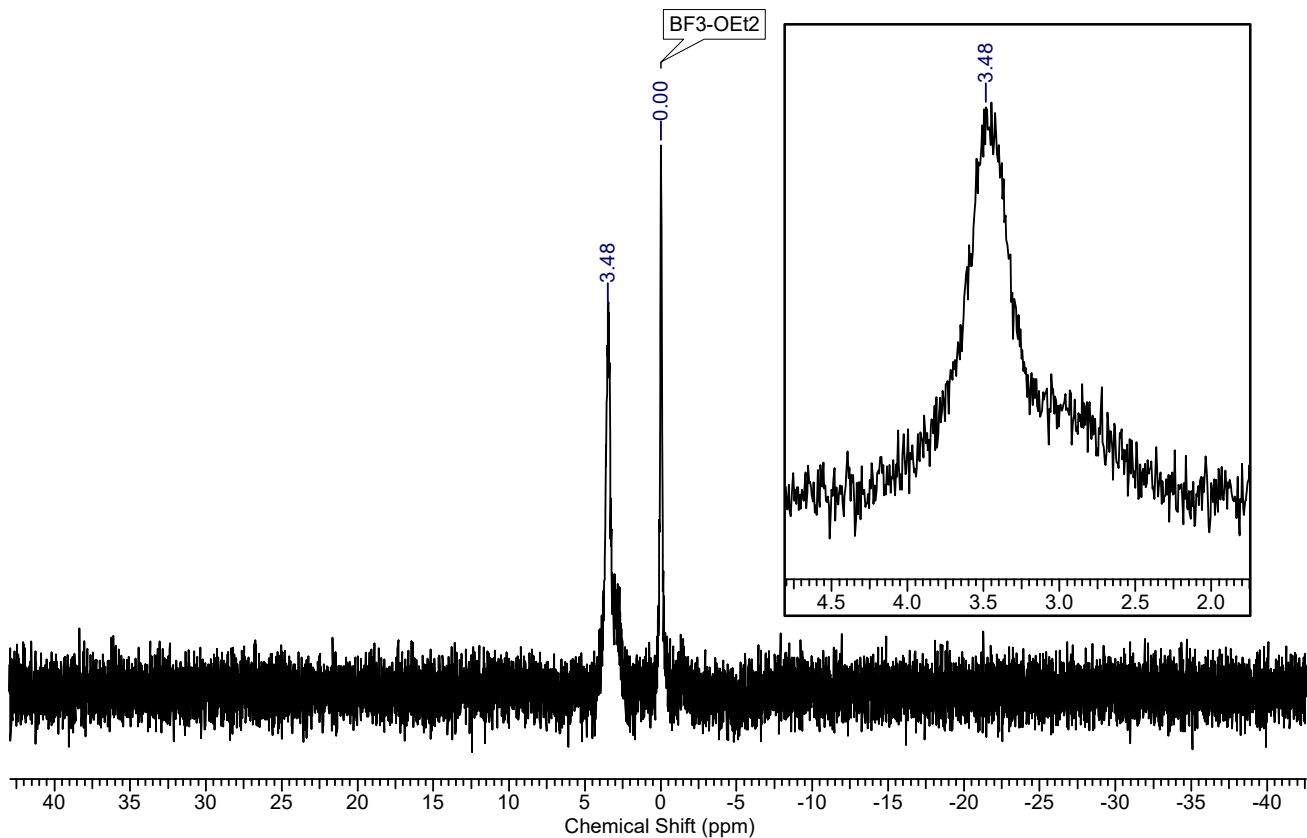

**Figure S3-4.**  $^{11}\text{B}$  NMR spectrum of compound **2a** in  $\text{CDCl}_3$  at room temperature.

## Synthesis of compound **1b**

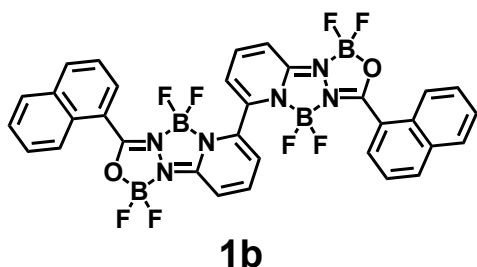

The product **1b** seems to be synthesized by TLC monitoring, however, during the purification by silica-gel column chromatography in DCM/hexane, **1b** appeared to decompose so that it cannot be isolated.

## Synthesis of compound **2b**

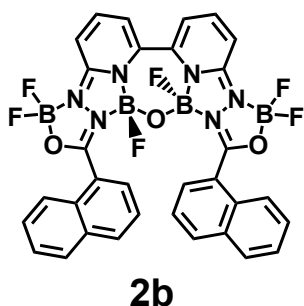

The reaction was performed following the general procedure starting with 6,6'-dihydrazineyl-2,2'-bipyridine (108 mg, 0.5 mmol) and 1-naphthoyl chloride (210 mg, 1.1 mmol). Compound **2b** was obtained as a yellow solid (37 mg, 11 %).

m.p. > 300°C.

<sup>1</sup>H NMR (400 MHz, CDCl<sub>3</sub>): δ = 8.55 (m, 1H), 8.53 (m, 1H), 7.93 (d, *J* = 7.3 Hz, 1H), 7.91 (d, *J* = 7.3 Hz, 1H), 7.84-7.83 (m, 2H), 7.82-7.81 (m, 2H), 7.69-7.61 (m, 4H), 7.56 (d, *J* = 8.3 Hz, 2H), 7.21 (d, *J* = 8.5 Hz, 2H), 7.10 (dd, *J* = 7.4, 0.9 Hz, 2H), 6.49-6.45 (m, 2H).

<sup>13</sup>C NMR (101 MHz, CDCl<sub>3</sub>): δ = 164.2, 150.3, 143.1, 142.4, 134.5, 133.5, 130.8, 130.4, 129.0, 128.4, 127.0, 125.4, 124.3, 120.0, 115.2, 111.2.

<sup>19</sup>F NMR (377 MHz, CDCl<sub>3</sub>): δ = -132.37 (s, 2F), -145.21 (m, 1F), -145.41 (m, 1F), -146.72 (m, 1F), -146.91 (m, 1F).

<sup>11</sup>B NMR (128 MHz, CDCl<sub>3</sub>): δ = 3.91 (s).

HRMS (FAB, positive): *m/z* calcd. for C<sub>32</sub>H<sub>20</sub>B<sub>4</sub>F<sub>6</sub>N<sub>6</sub>O<sub>3</sub> [M]<sup>+</sup> 694.1873; found: 694.1877.

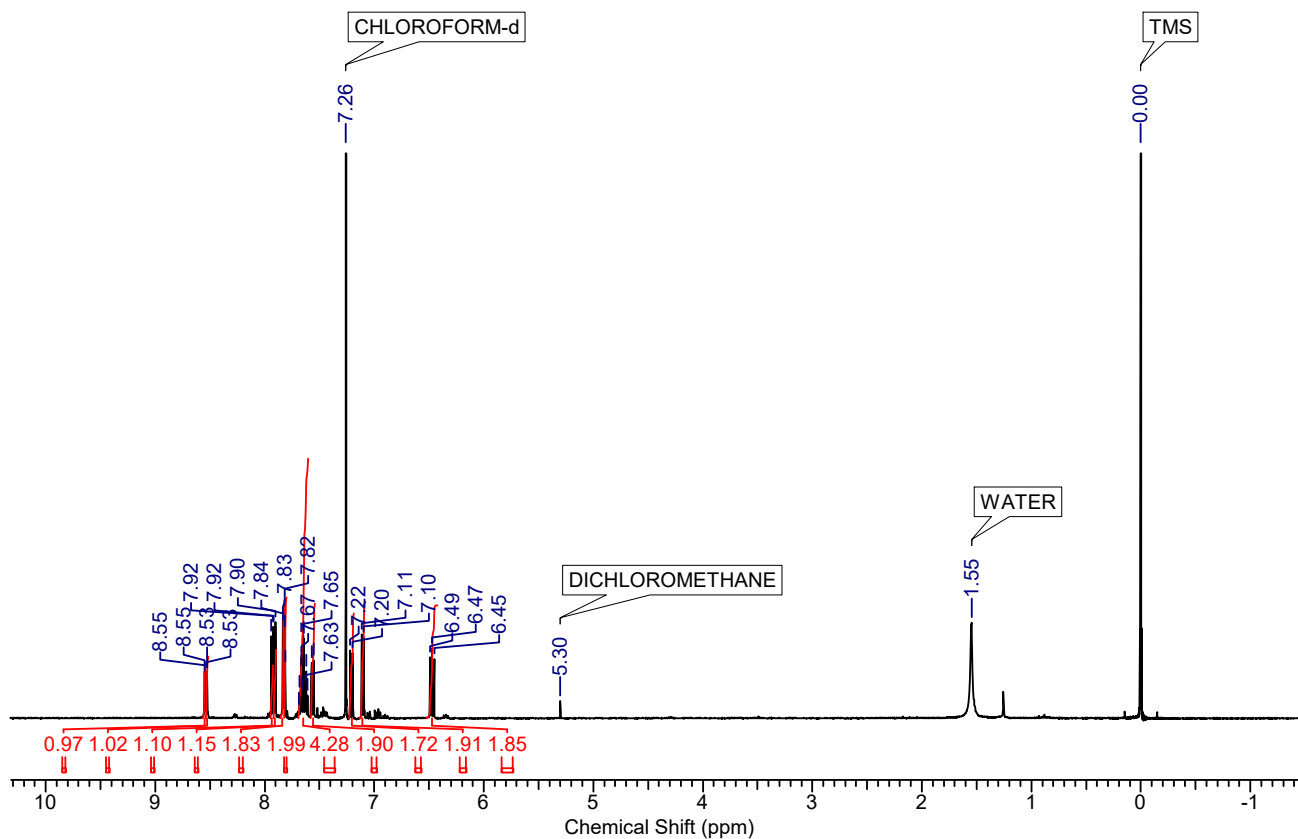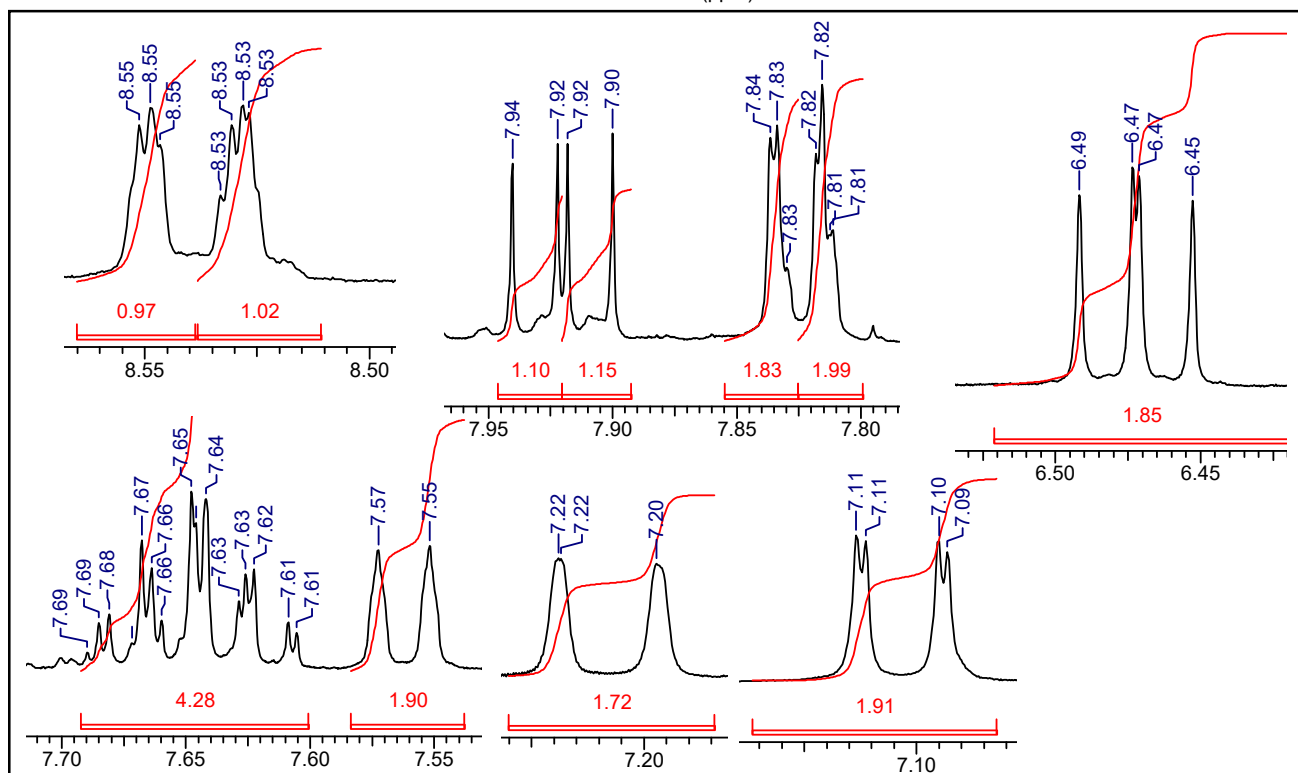

Figure S4-1.  $^1\text{H}$  NMR spectrum of compound **2b** in  $\text{CDCl}_3$  at room temperature.

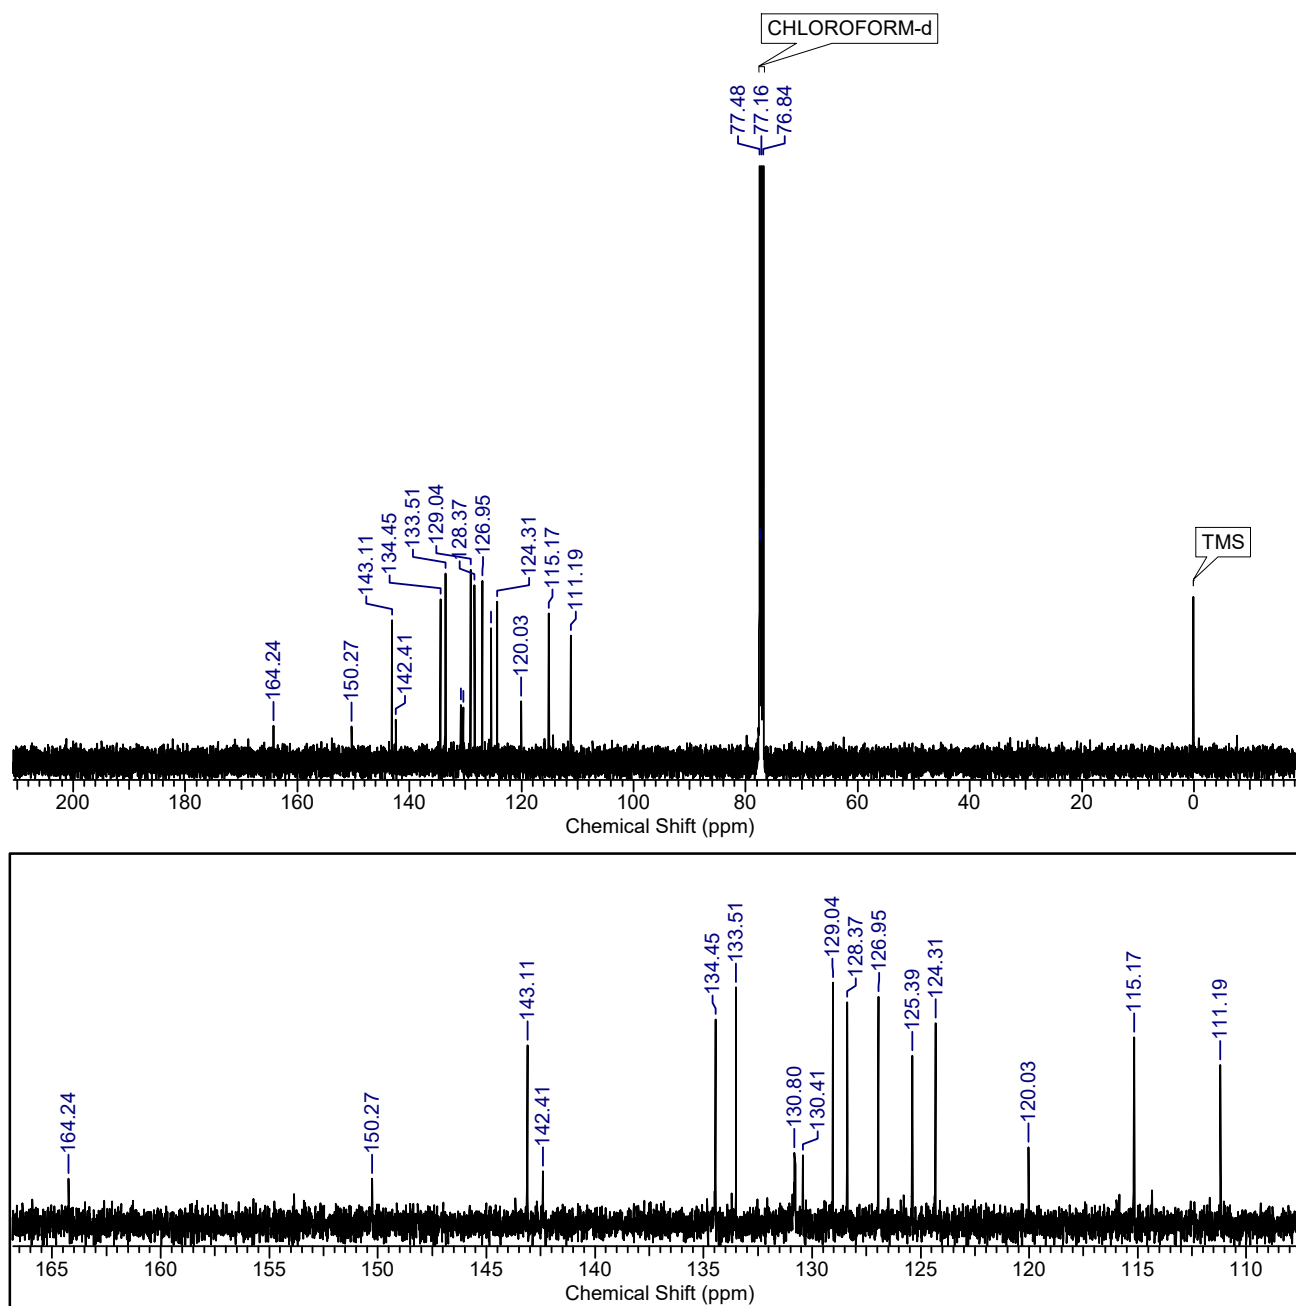

**Figure S4-2.**  $^{13}\text{C}$  NMR spectrum of compound **2b** in  $\text{CDCl}_3$  at room temperature.



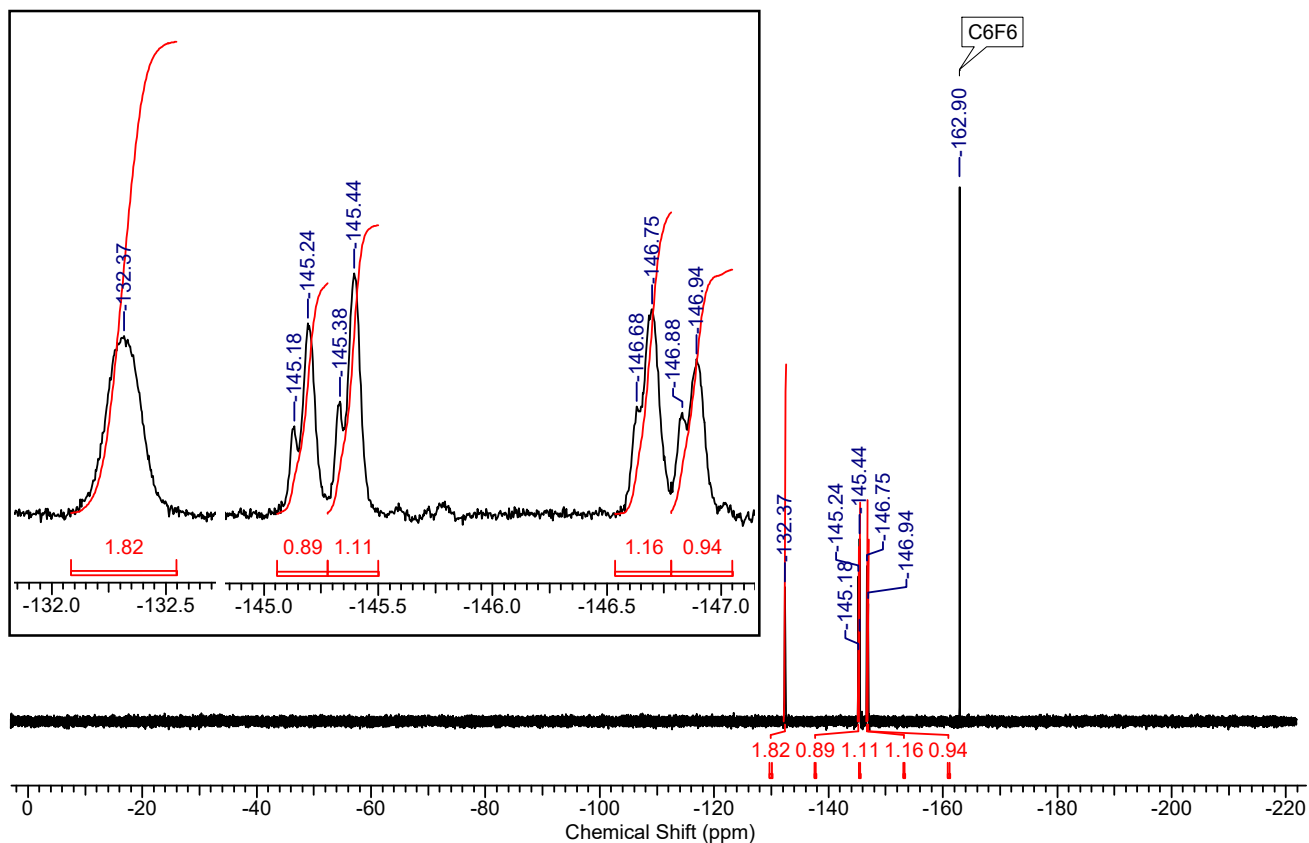

Figure S4-3.  $^{19}\text{F}$  NMR spectrum of compound **2b** in  $\text{CDCl}_3$  at room temperature.

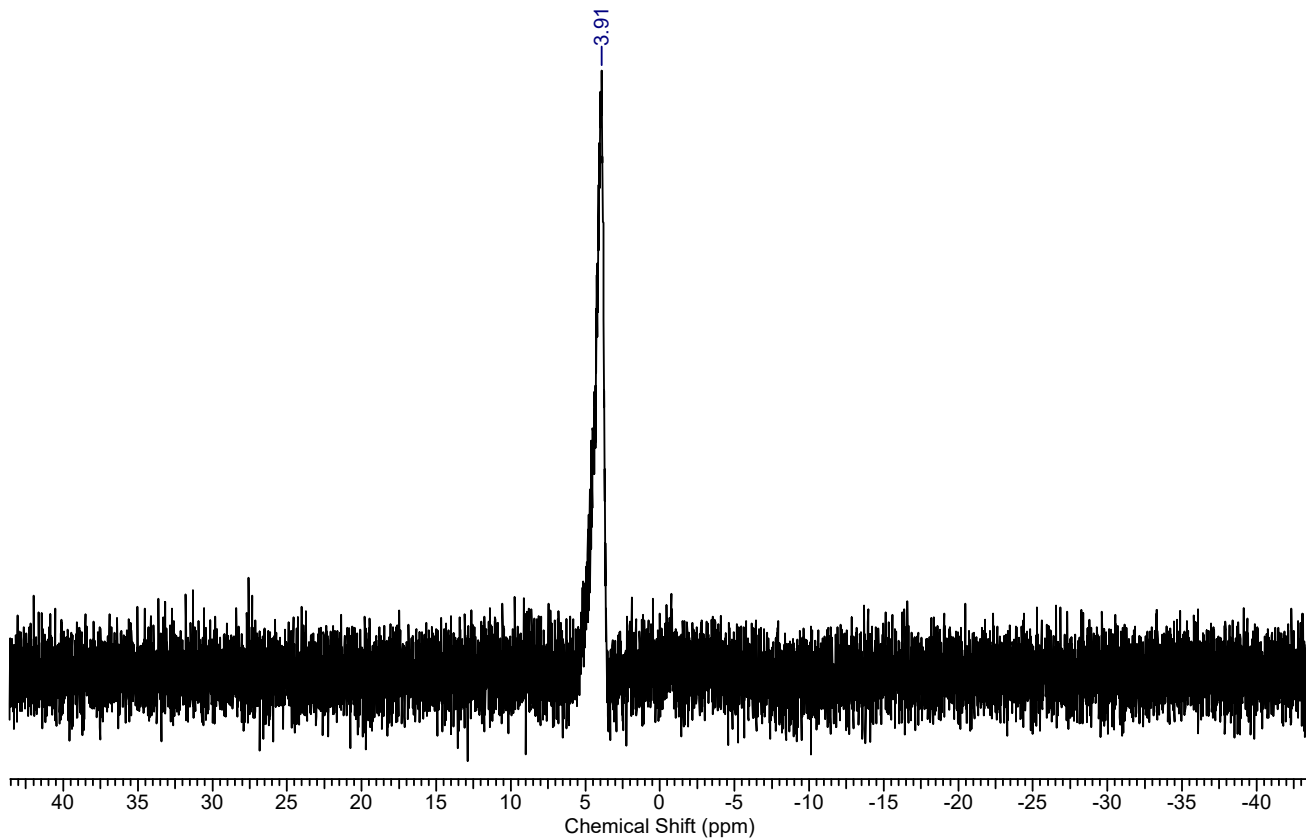

Figure S4-4.  $^{11}\text{B}$  NMR spectrum of compound **2b** in  $\text{CDCl}_3$  at room temperature.

## Synthesis of compounds **1c** and **2c**

**Note:** 4-(dimethylamino)benzoyl chloride was synthesized according to the reported method.<sup>2</sup>

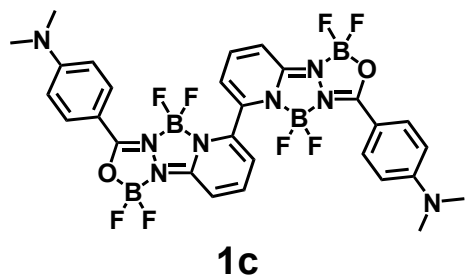

The reaction was performed following the general procedure starting with 6,6'-dihydrazineyl-2,2'-bipyridine (108 mg, 0.5 mmol) and 4-(dimethylamino)benzoyl chloride (202 mg, 1.1 mmol). Compound **1c** was obtained as a yellow solid (121 mg, 35 %).

m.p. > 300°C.

<sup>1</sup>H NMR (400 MHz, CDCl<sub>3</sub>):  $\delta$  = 7.96-7.95 (m, 2H), 7.93-7.92 (m, 2H), 7.83 (m, 2H), 7.14 (d,  $J$  = 9.0 Hz, 2H), 6.96 (d,  $J$  = 7.0 Hz, 2H), 6.67-6.65 (m, 2H), 6.64-6.63 (m, 2H), 3.07 (s, 12H).

<sup>13</sup>C NMR (101 MHz, CDCl<sub>3</sub>): 159.2, 157.1, 154.6, 141.9, 140.4, 131.8, 111.3, 110.8, 110.3, 110.1, 108.4, 53.6, 40.1.

<sup>19</sup>F NMR (377 MHz, CDCl<sub>3</sub>):  $\delta$  = (-131.52)-(-131.68) (m, 2F), (-143.45)-(-143.61) (m, 2F), (-147.69)-(-147.90) (m, 2F), (-149.06)-(-149.25) (m, 2F).

<sup>11</sup>B NMR (128 MHz, CDCl<sub>3</sub>):  $\delta$  = 3.38-2.99 (m).

HRMS (FAB, positive):  $m/z$  calcd. for C<sub>28</sub>H<sub>26</sub>B<sub>4</sub>F<sub>8</sub>N<sub>8</sub>O<sub>2</sub> [M]<sup>+</sup> 702.2423; found: 702.2422.

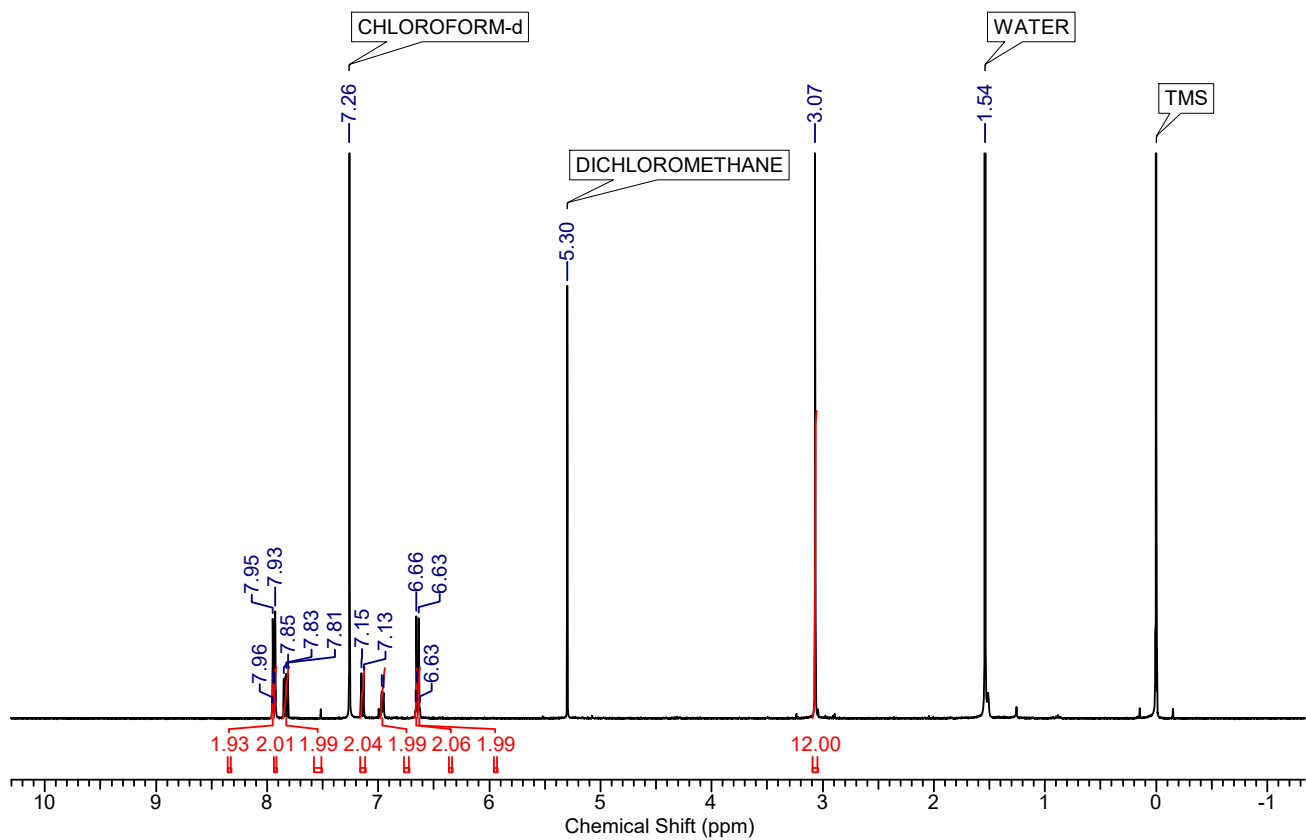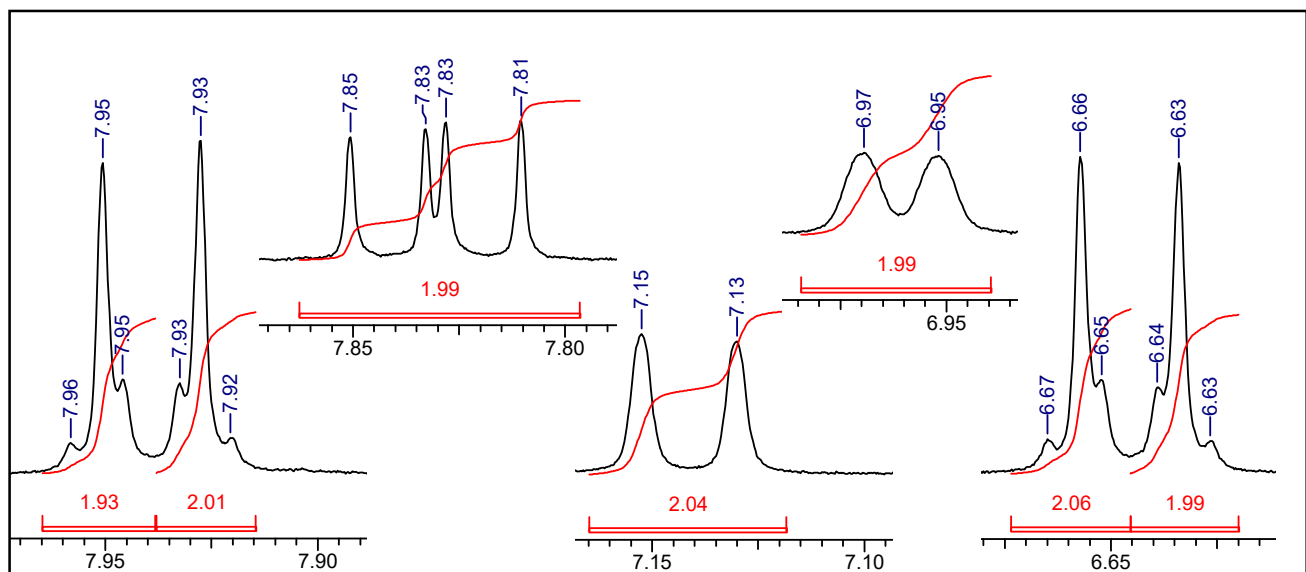

Figure S5-1.  $^1\text{H}$  NMR spectrum of compound **1c** in  $\text{CDCl}_3$  at room temperature.

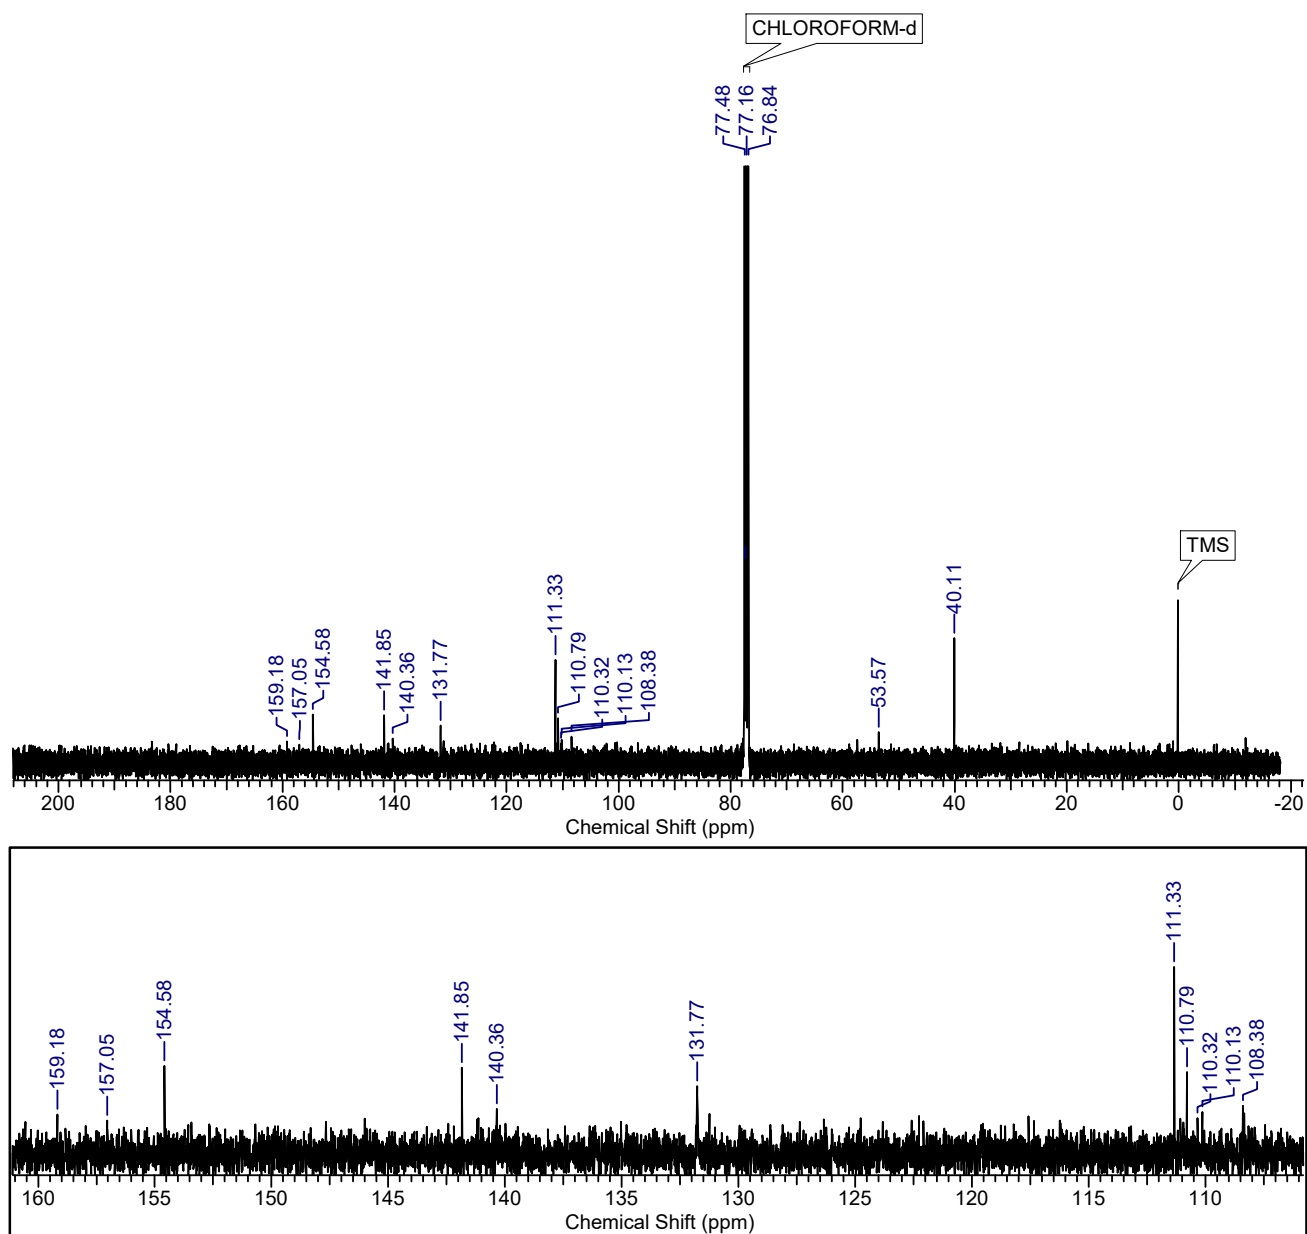

**Figure S5-2.**  $^{13}\text{C}$  NMR spectrum of compound **1c** in  $\text{CDCl}_3$  at room temperature.

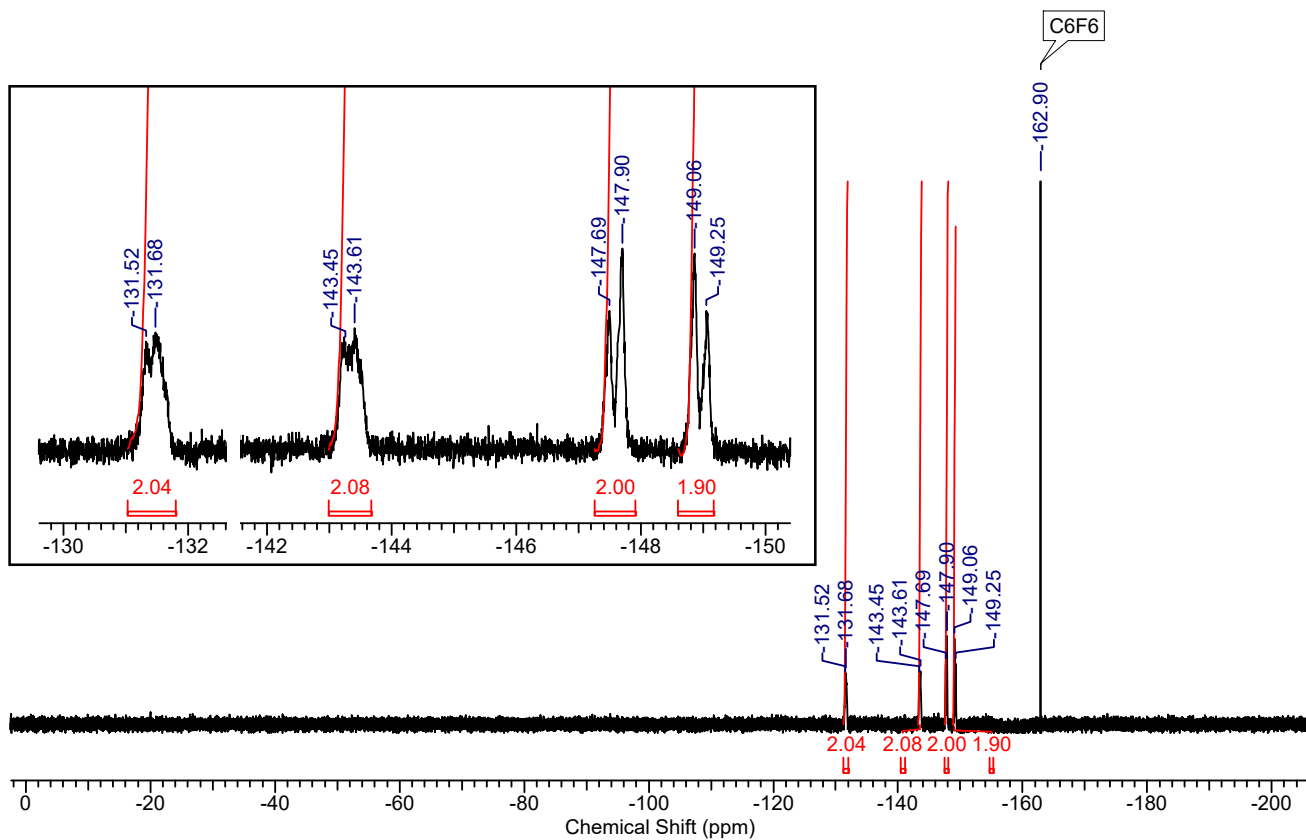

**Figure S5-3.**  $^{19}\text{F}$  NMR spectrum of compound **1c** in  $\text{CDCl}_3$  at room temperature.

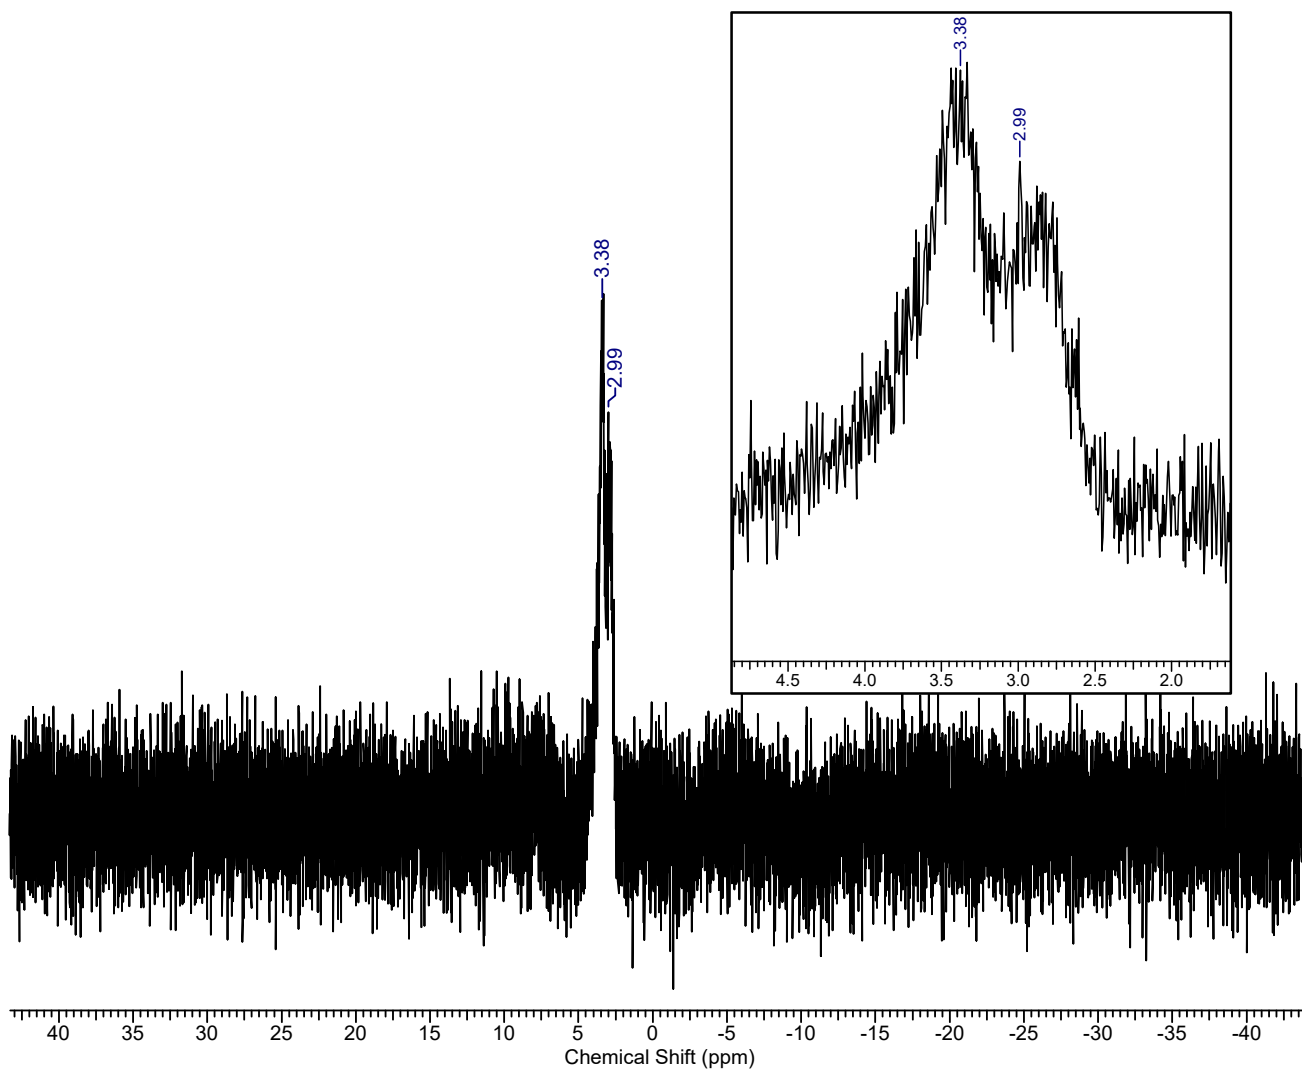

**Figure S5-4.**  $^{11}\text{B}$  NMR spectrum of compound **1c** in  $\text{CDCl}_3$  at room temperature.

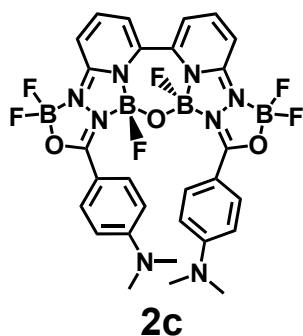

Following the synthesis procedure of compound **1c**, compound **2c** was simultaneously obtained as a red solid (23 mg, 7 %).

m.p.: ~ 280°C.

$^1\text{H}$  NMR (400 MHz,  $\text{CD}_2\text{Cl}_2$ ):  $\delta$  = 7.99-7.98 (m, 2H), 7.96-7.95 (m, 2H), 7.85 (m, 2H), 7.11 (s, 1H), 7.09 (d,  $J$  = 3.1 Hz, 2H), 7.06 (s, 1H), 6.40-6.39 (m, 2H), 6.37-6.36 (m, 2H), 2.94 (s, 12H)

$^{13}\text{C}$  NMR (101 MHz,  $\text{CD}_2\text{Cl}_2$ ):  $\delta$  = 162.4, 154.4, 149.8, 142.8, 142.6, 131.9, 129.2, 114.9, 111.2, 111.0, 108.8, 40.1.

$^{19}\text{F}$  NMR (377 MHz,  $\text{CD}_2\text{Cl}_2$ ):  $\delta$  = -135.50 (s, 2F), -147.62 (m, 1F), -147.83 (m, 1F), -149.87 (m, 1F), -150.07 (m, 1F).

$^{11}\text{B}$  NMR (128 MHz,  $\text{CD}_2\text{Cl}_2$ ):  $\delta$  = 3.43 (s).

HRMS (FAB, positive):  $m/z$  calcd. for  $\text{C}_{28}\text{H}_{26}\text{B}_4\text{F}_6\text{N}_8\text{O}_3$   $[\text{M}]^+$  680.2404; found: 680.2407.

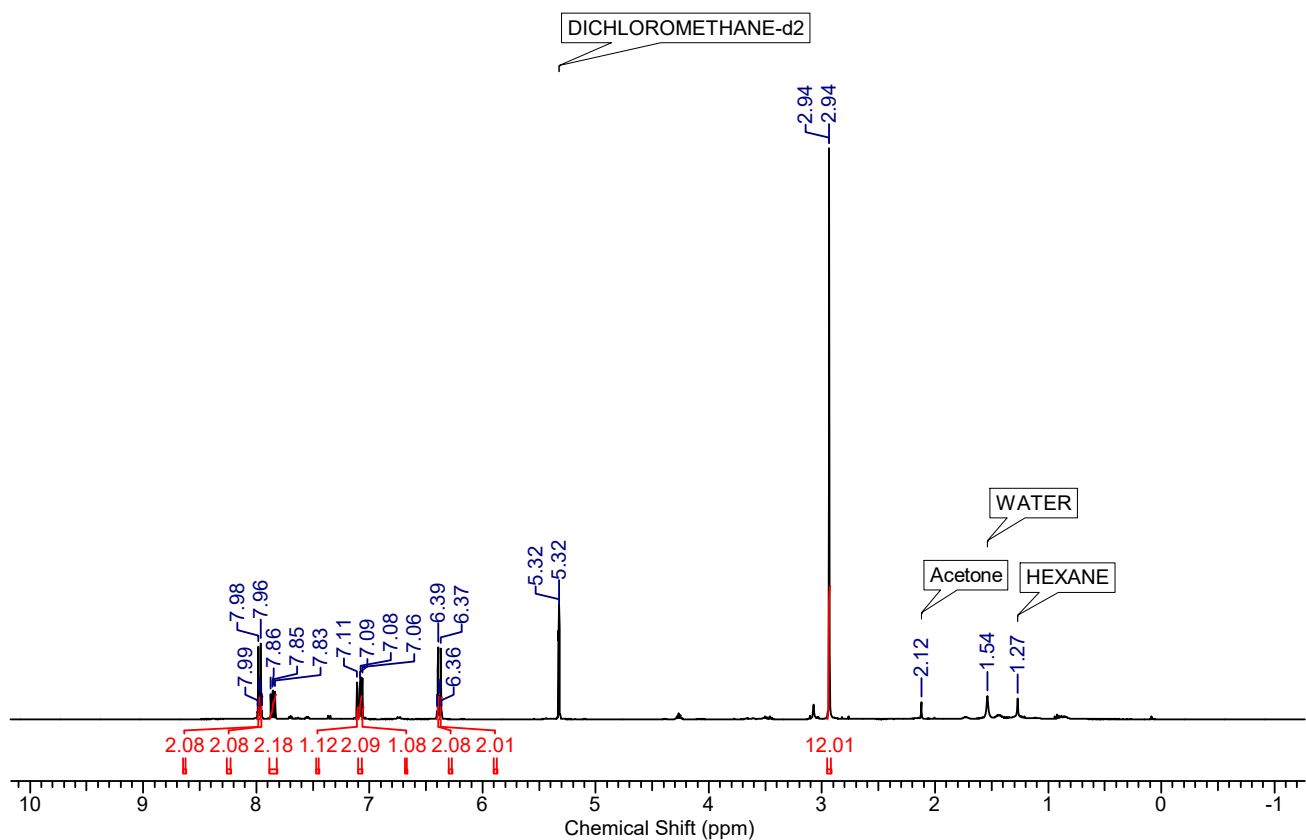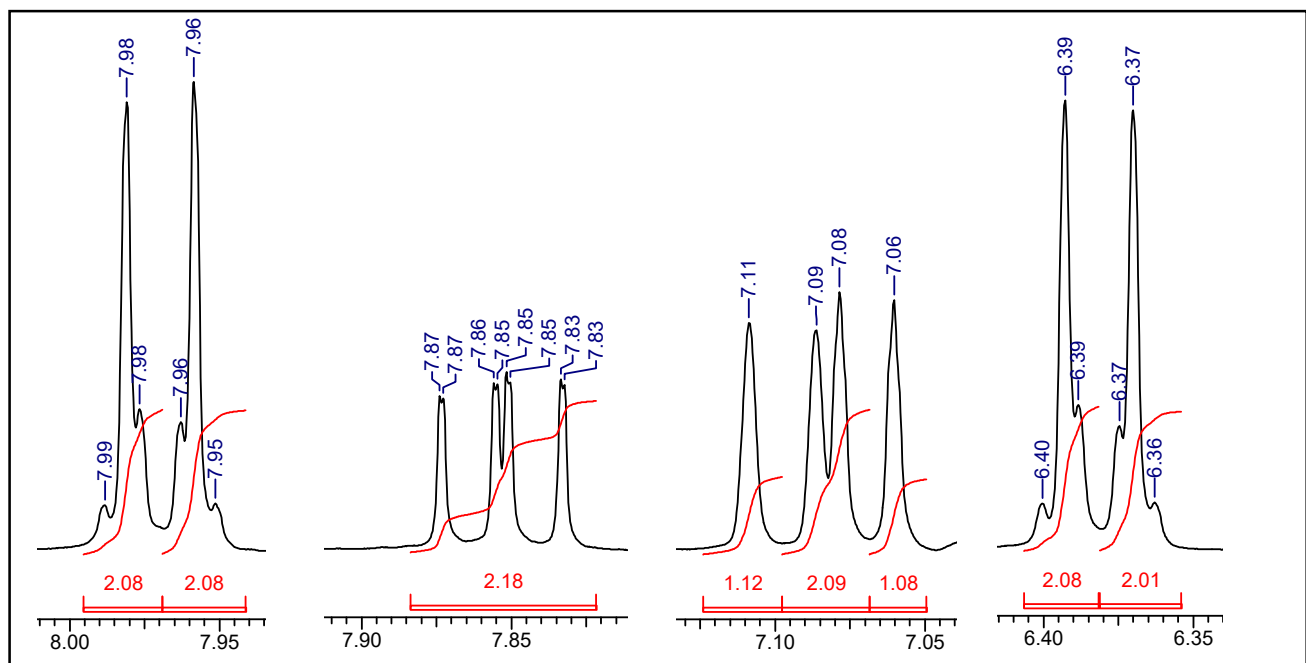

**Figure S6-1.** <sup>1</sup>H NMR spectrum of compound **2c** in CD<sub>2</sub>Cl<sub>2</sub> at room temperature.



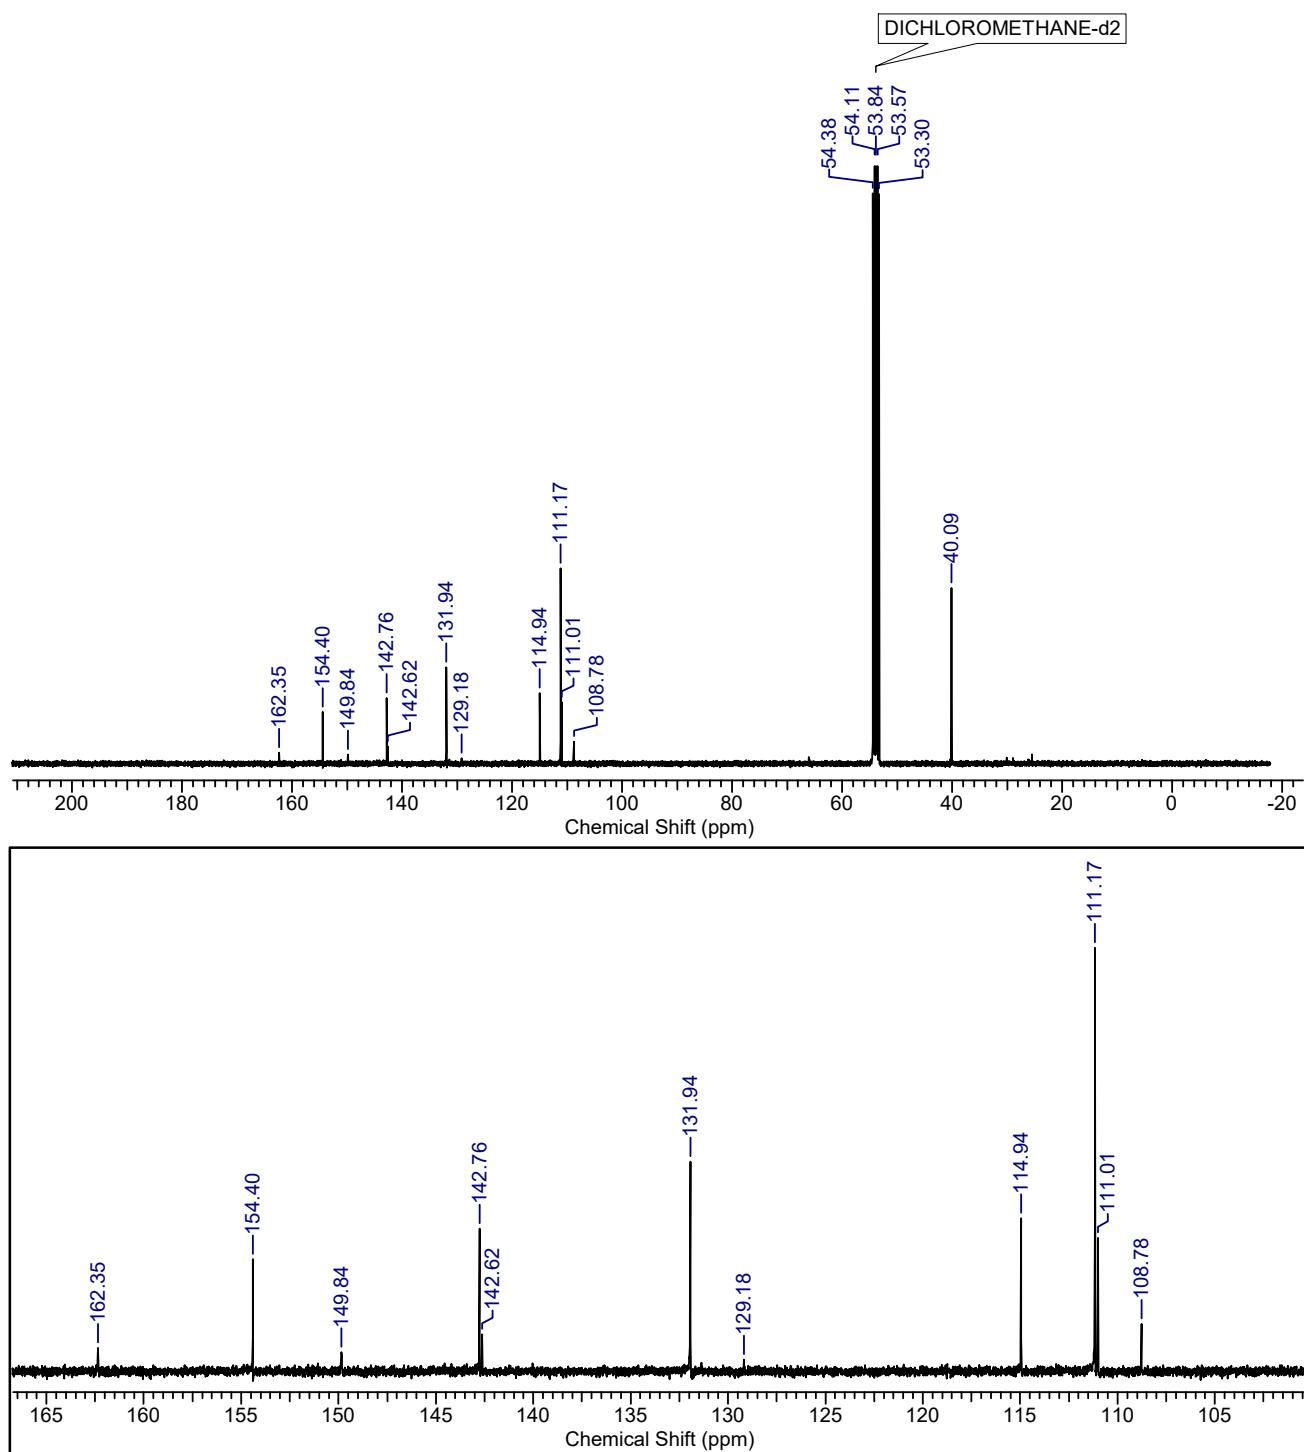

**Figure S6-2.** <sup>13</sup>C NMR spectrum of compound **2c** in CD<sub>2</sub>Cl<sub>2</sub> at room temperature.

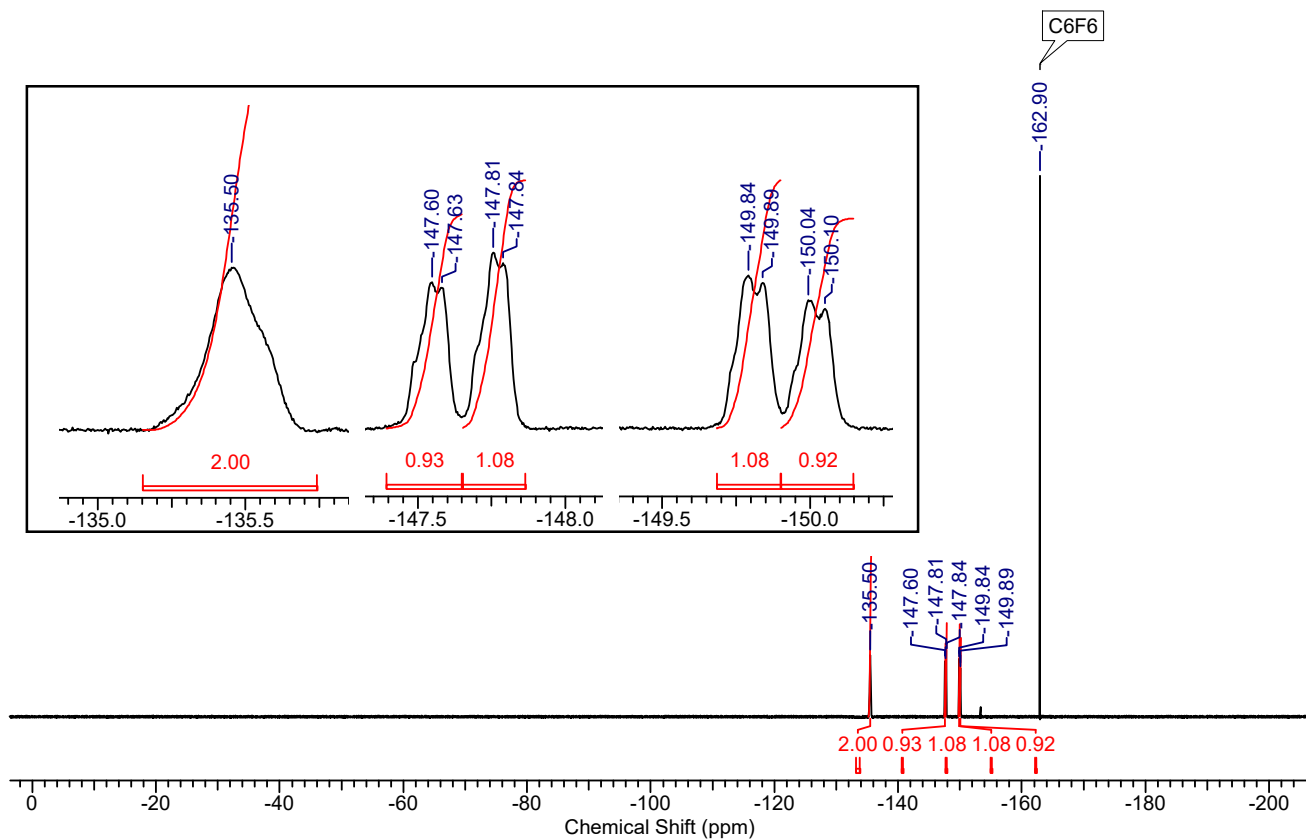

**Figure S6-3.**  $^{19}\text{F}$  NMR spectrum of compound **2c** in  $\text{CD}_2\text{Cl}_2$  at room temperature.

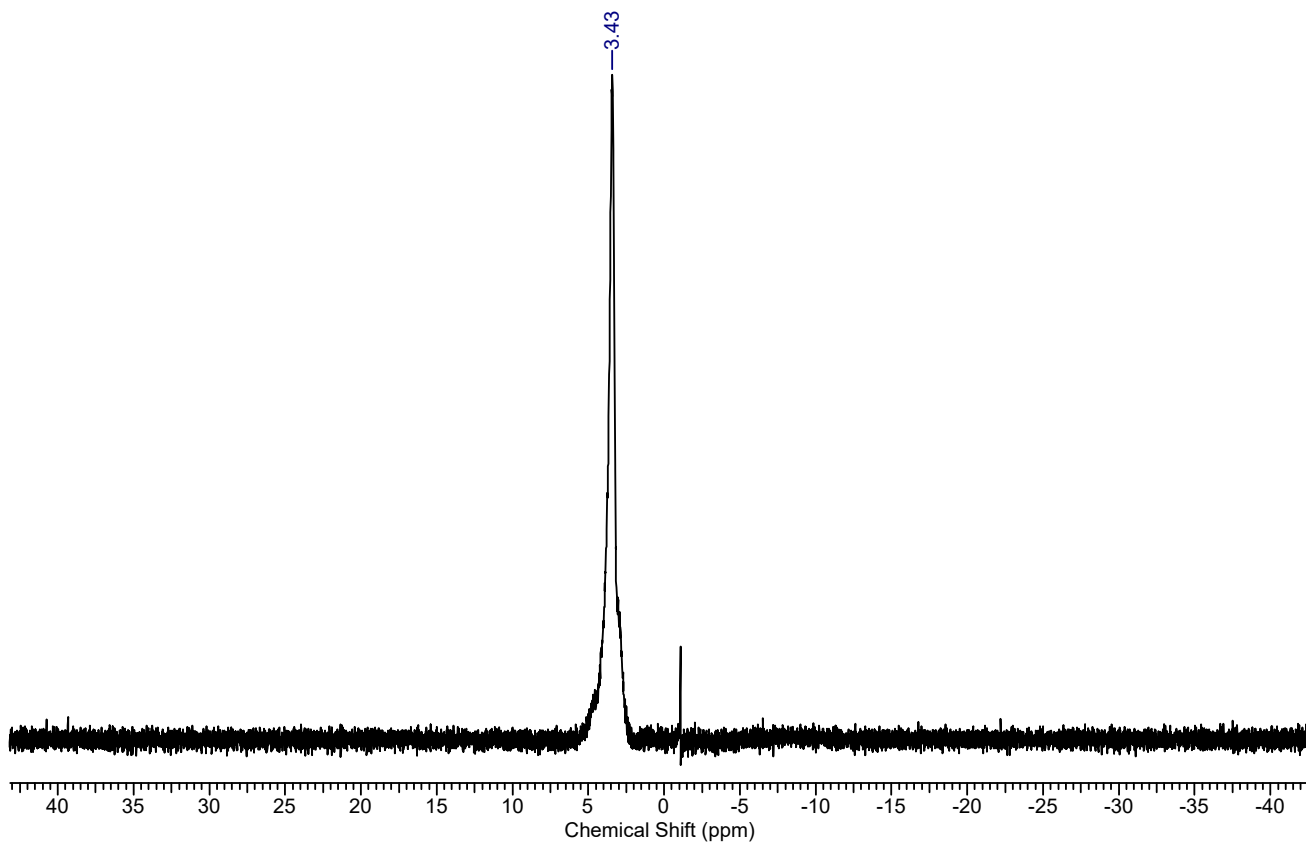

**Figure S6-4.**  $^{11}\text{B}$  NMR spectrum of compound **2c** in  $\text{CD}_2\text{Cl}_2$  at room temperature.

## Synthesis of compounds **1d** and **2d**

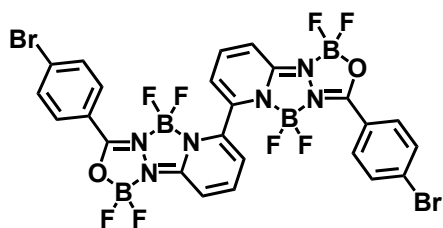

**1d**

The reaction was performed following the general procedure starting with 6,6'-dihydrazoneyl-2,2'-bipyridine (216 mg, 1.0 mmol) and 4-bromobenzoyl chloride (483 mg, 2.2 mmol). Compound **1d** was obtained as a yellow solid (70 mg, 9 %).

m.p. > 300 °C.

$^1\text{H}$  NMR (400 MHz,  $\text{CDCl}_3$ ):  $\delta$  = 7.99 (d,  $J$  = 7.1 Hz, 1H), 7.97 (d,  $J$  = 7.3 Hz, 1H), 7.95-7.94 (m, 2H), 7.93-7.92 (m, 2H), 7.67-7.66 (m, 2H), 7.64-7.63 (m, 2H), 7.24 (d,  $J$  = 9.3 Hz, 2H), 7.07 (d,  $J$  = 7.4 Hz, 2H).

$^{13}\text{C}$  NMR (101 MHz,  $\text{CDCl}_3$ ):  $\delta$  = 162.7, 150.5, 143.2, 140.1, 132.9, 130.8, 121.7, 117.3, 111.2.

$^{19}\text{F}$  NMR (377 MHz,  $\text{CDCl}_3$ ):  $\delta$  = (-128.25)-(-128.34) (m, 2F), (-140.06)-(-140.25) (m, 2F), (-142.41)-(-142.60) (m, 2F), (-143.86)-(-144.04) (m, 2F).

$^{11}\text{B}$  NMR (128 MHz,  $\text{CDCl}_3$ ):  $\delta$  = 3.47 (brs, 2B), 2.66 (brs, 2B).

HRMS (FAB, positive):  $m/z$  calcd. for  $\text{C}_{24}\text{H}_{14}\text{B}_4\text{Br}_2\text{F}_8\text{N}_6\text{O}_2$   $[\text{M}]^+$  771.9789; found: 771.9791.

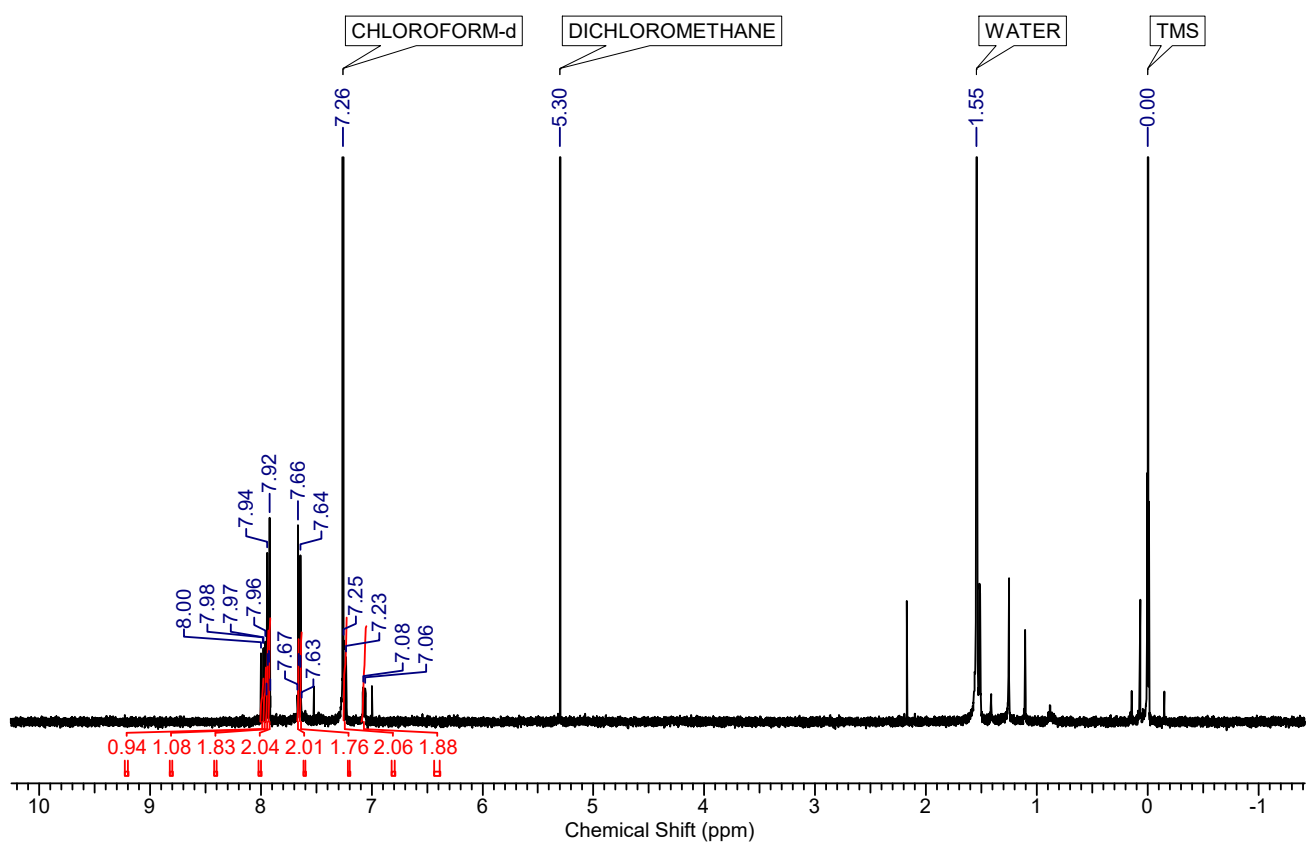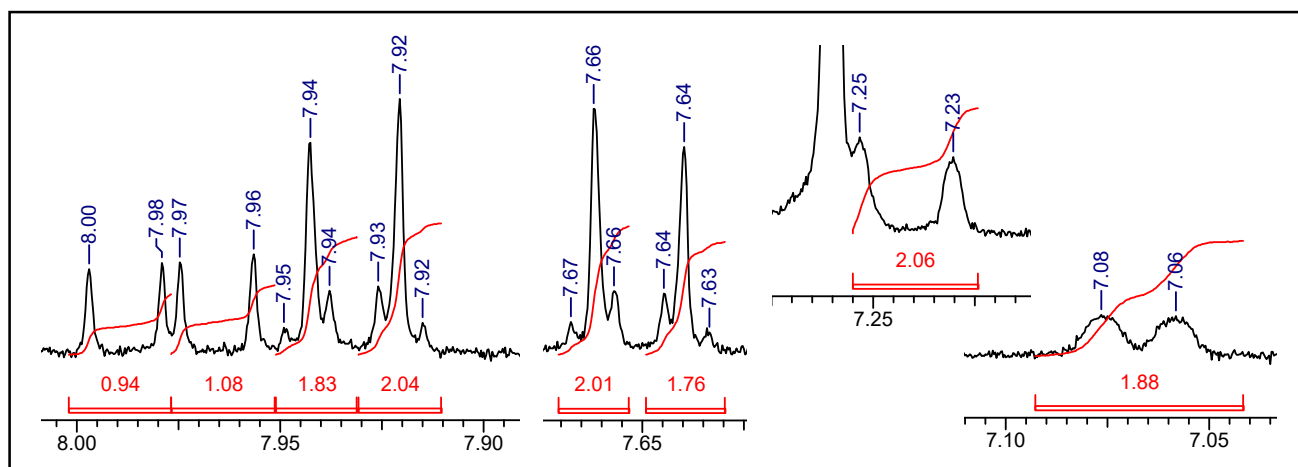

Figure S7-1.  $^1\text{H}$  NMR spectrum of compound **1d** in  $\text{CDCl}_3$  at room temperature.

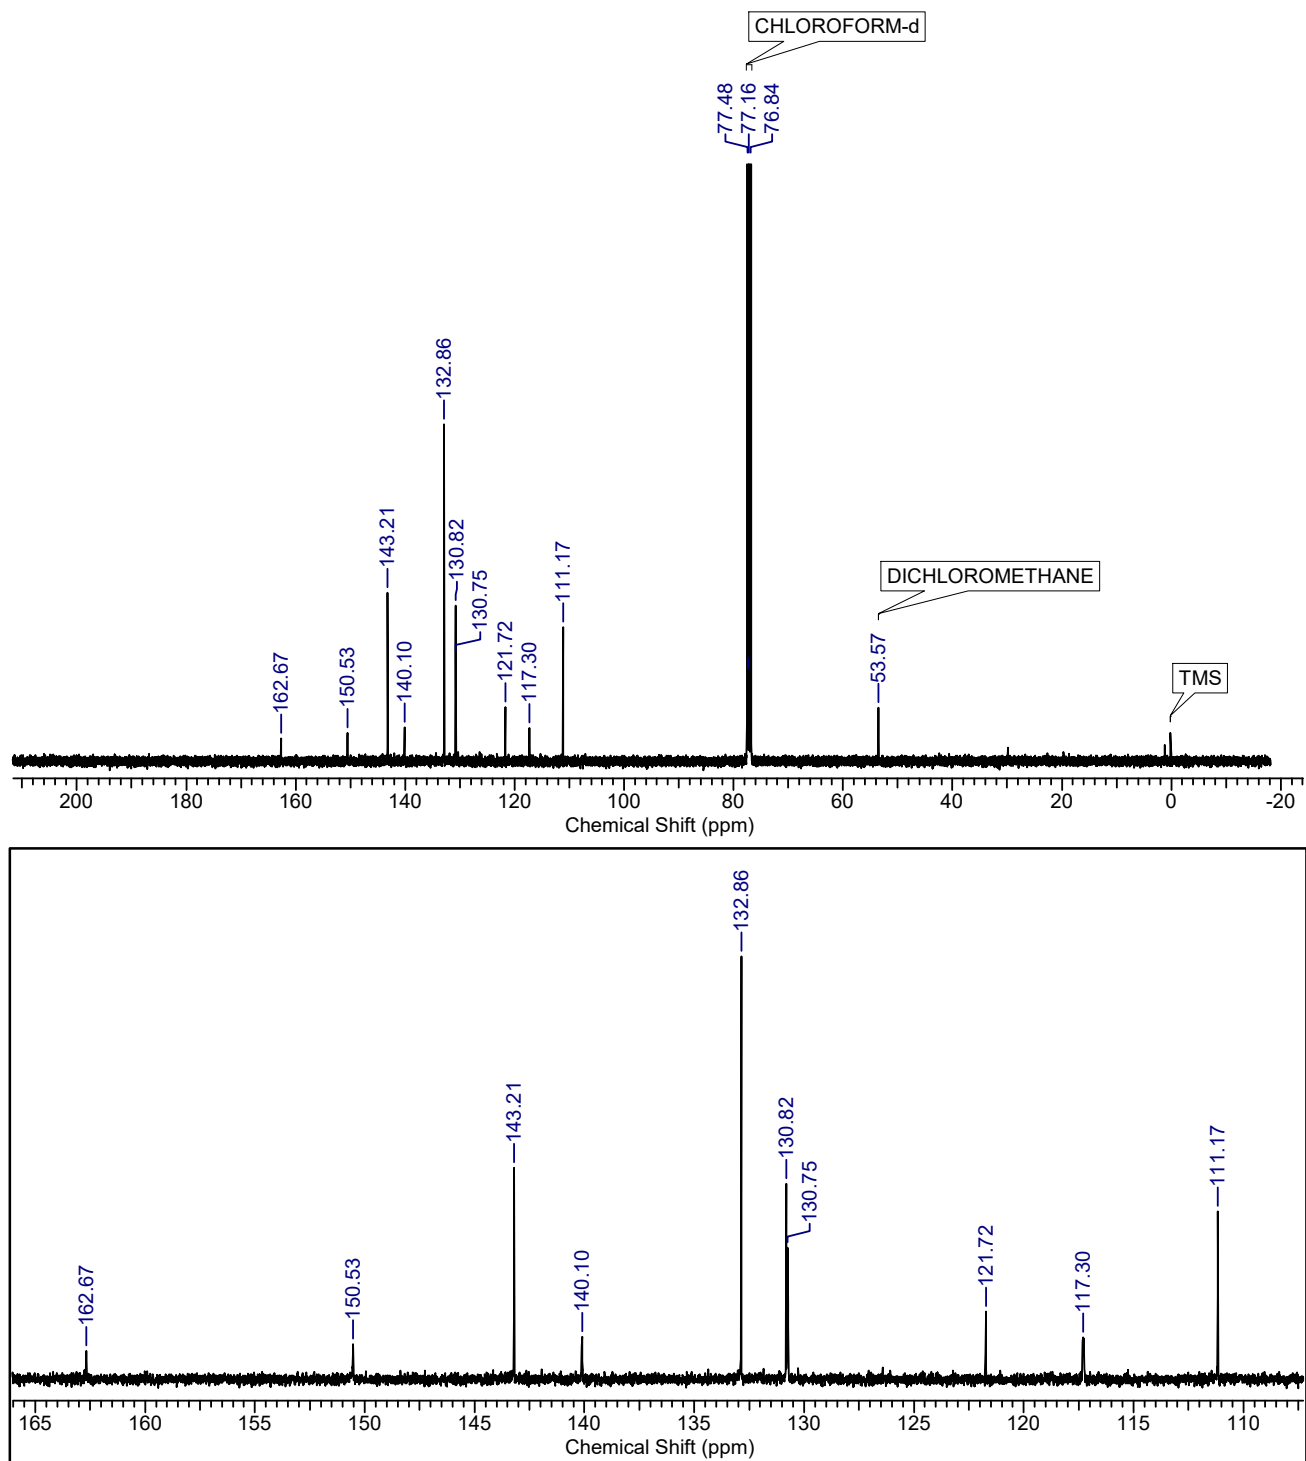

**Figure S7-2.**  $^{13}\text{C}$  NMR spectrum of compound **1d** in  $\text{CDCl}_3$  at room temperature.

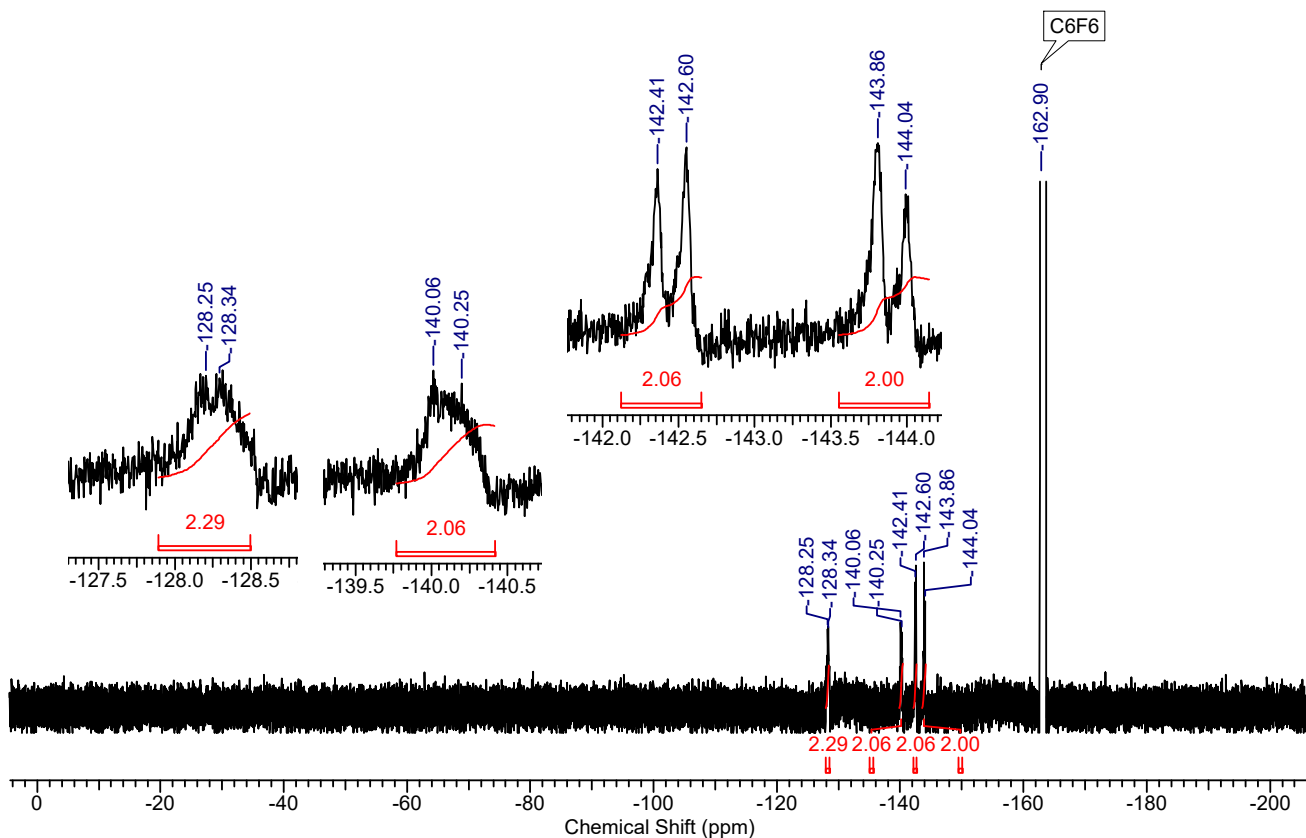

Figure S7-3.  $^{19}\text{F}$  NMR spectrum of compound **1d** in  $\text{CDCl}_3$  at room temperature.

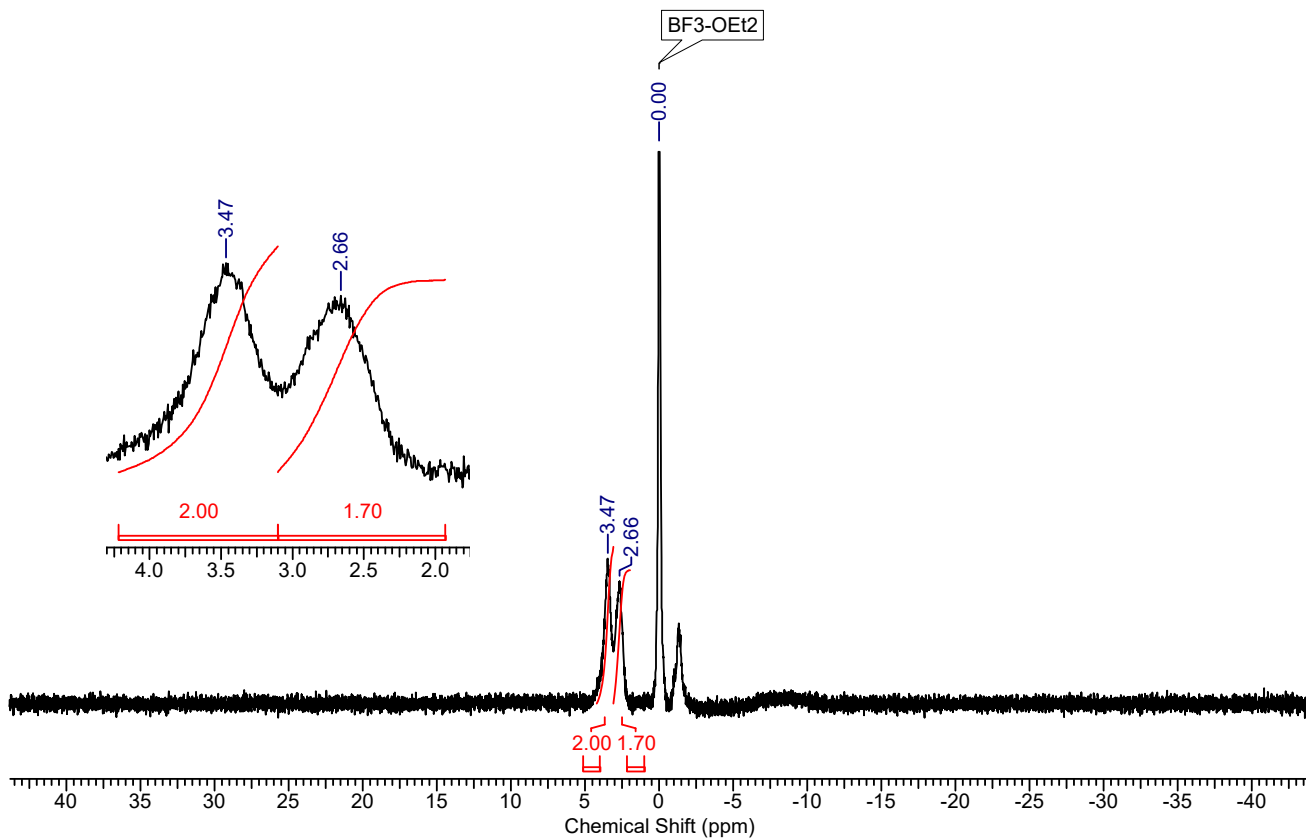

Figure S7-4.  $^{11}\text{B}$  NMR spectrum of compound **1d** in  $\text{CDCl}_3$  at room temperature.

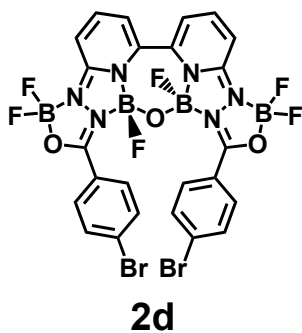

Following the synthesis procedure of compound **1d**, compound **2d** was simultaneously obtained as a yellow solid (30 mg, 4 %).

m.p. > 300 °C.

$^1\text{H}$  NMR (400 MHz,  $\text{CDCl}_3$ ):  $\delta$  = 7.95 (d,  $J$  = 7.3 Hz, 1H), 7.93 (d,  $J$  = 7.3 Hz, 1H), 7.88-7.87 (m, 2H), 7.86-7.85 (m, 2H), 7.39-7.38 (m, 2H), 7.36-7.35 (m, 2H), 7.21 (d,  $J$  = 9.0 Hz, 2H), 7.13 (dd,  $J$  = 7.3, 0.9 Hz, 2H).

$^{13}\text{C}$  NMR (101 MHz,  $\text{CDCl}_3$ ): No analyzable  $^{13}\text{C}$  spectrum could be recorded due to the low solubility.

$^{19}\text{F}$  NMR (377 MHz,  $\text{CDCl}_3$ ):  $\delta$  = -134.29 (s, 2F), -145.12 (s, 1F), -145.32 (s, 1F), -147.86 (s, 1F), -148.06 (s, 1F).

$^{11}\text{B}$  NMR (128 MHz,  $\text{CDCl}_3$ ): No analyzable  $^{11}\text{B}$  spectrum could be recorded due to the low solubility.

HRMS (FAB, positive):  $m/z$  calcd. for  $\text{C}_{24}\text{H}_{14}\text{B}_4\text{Br}_2\text{F}_6\text{N}_6\text{O}_3$   $[\text{M}]^+$  749.9771; found: 749.9775.

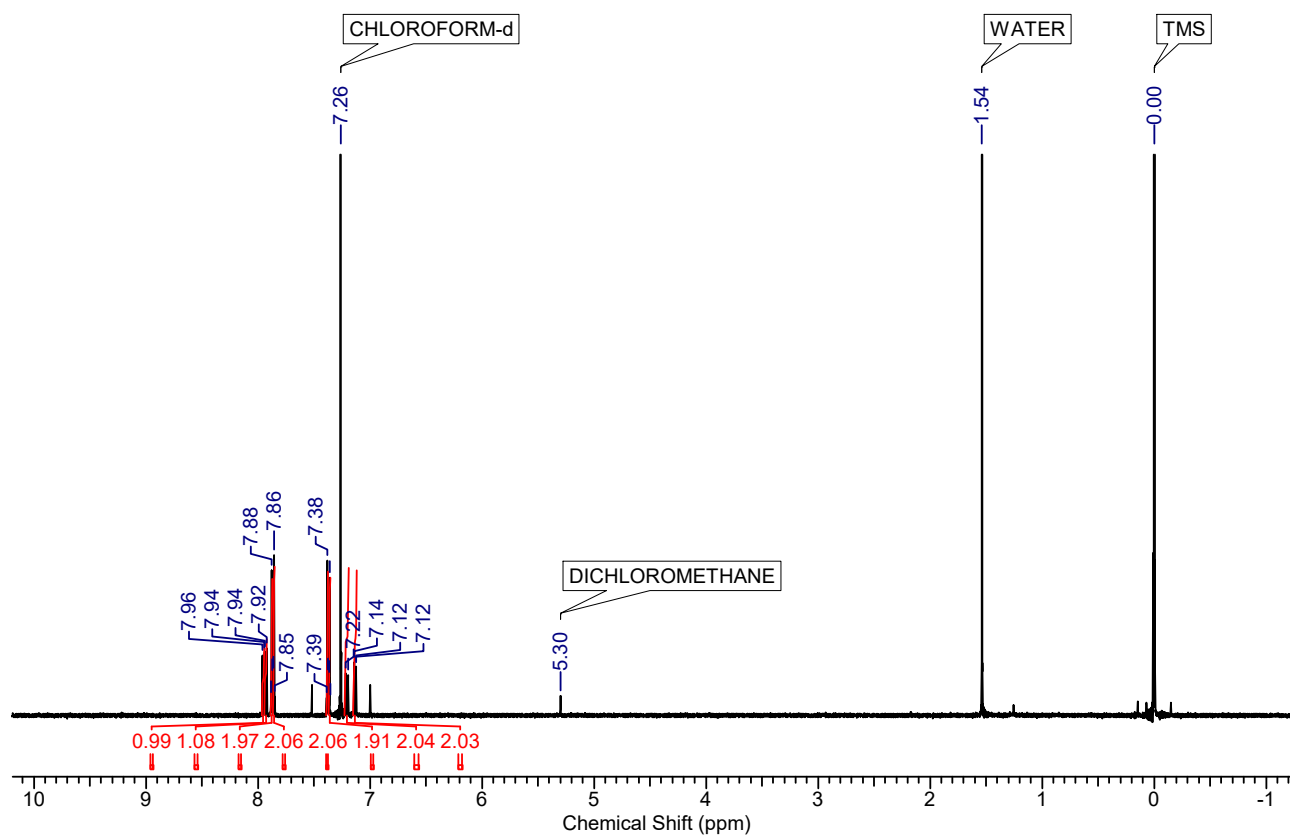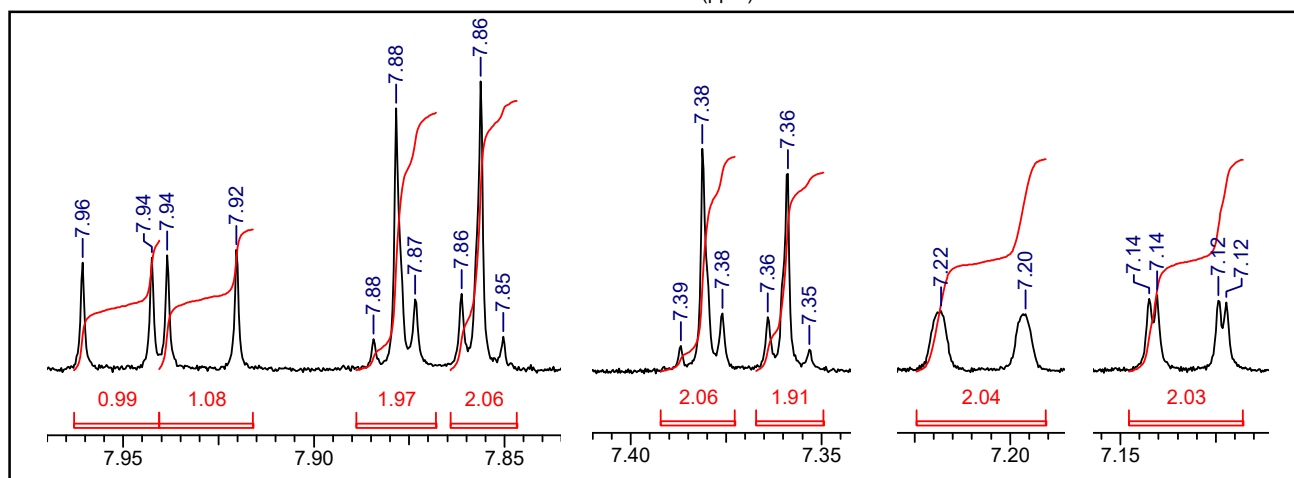

**Figure S8-1.** <sup>1</sup>H NMR spectrum of compound **2d** in CDCl<sub>3</sub> at room temperature.



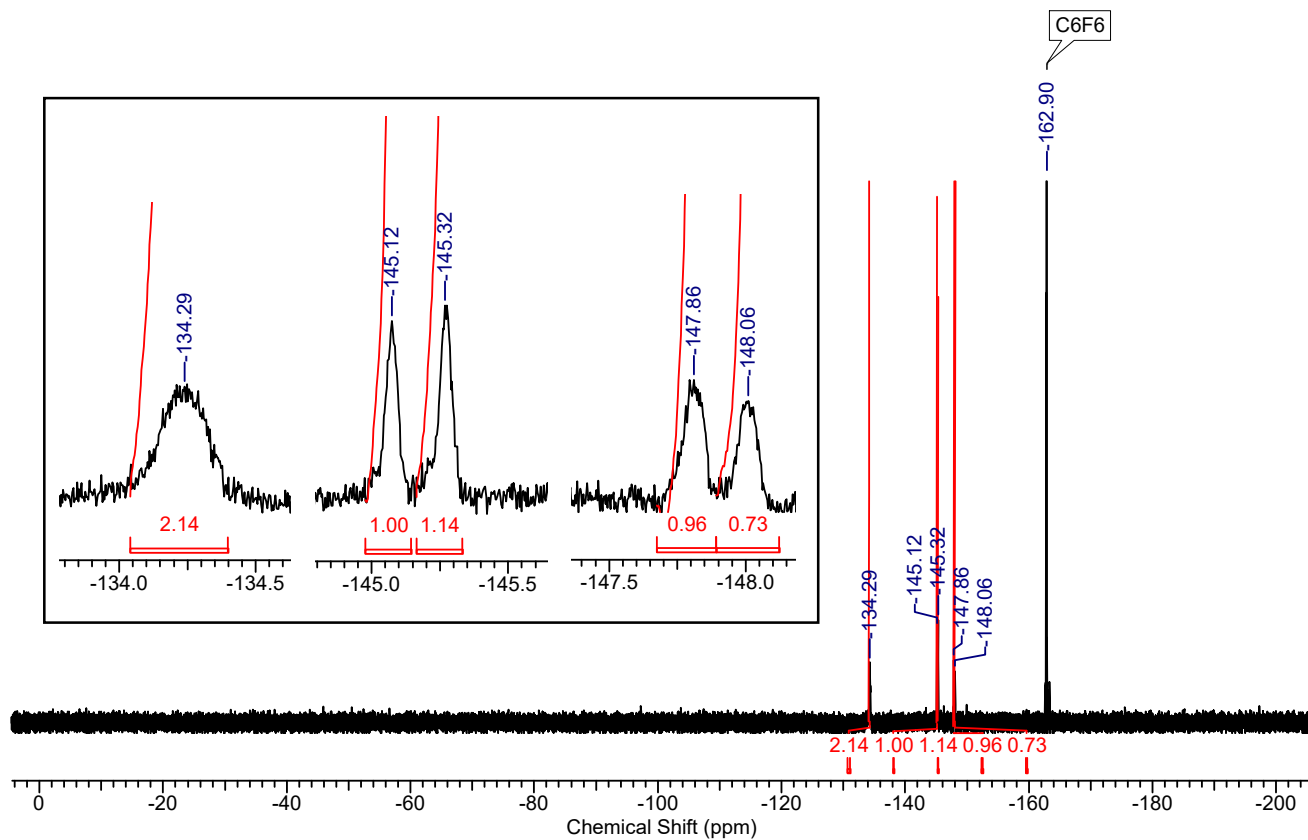

**Figure S8-2.**  $^{19}\text{F}$  NMR spectrum of compound **2d** in  $\text{CDCl}_3$  at room temperature.

## X-ray crystallographic analysis

The crystals were mounted on a loop. Diffraction data of crystal samples were collected using a Rigaku XtaLABmini CCD diffractometer equipped with graphite-monochromated Mo K $\alpha$  radiation ( $\lambda = 0.71073 \text{ \AA}$ ) or XtaLAB Synergy R/DW system, HyPix diffractometer using Cu K $\alpha$  radiation ( $\lambda = 1.54184 \text{ \AA}$ ). Collected data were integrated, corrected, and scaled using CrysAlisPro.<sup>3</sup> The structures were refined using SHELXT (Sheldrick, 2015)<sup>4</sup> Intrinsic phasing and SHELXL (Sheldrick, 2015).<sup>5</sup> All nonhydrogen atoms were refined anisotropically. Hydrogen atoms were located at calculated positions and included in the structure factor calculation but were not refined. The program Olex 2 was used as a graphical interface.<sup>6</sup> Crystallographic data have been deposited with the joint Cambridge Crystallographic Data Centre and Fachinformationszentrum Karlsruhe Access Structures service. The data can be obtained free of charge on application to CCDC, 12 Union Road, Cambridge CB21EZ, UK (fax: (+44) 1223-336-033; email: [deposit@ccdc.cam.ac.uk](mailto:deposit@ccdc.cam.ac.uk)). The CCDC numbers for crystal structures of **1a**, **2a**, **1c**, **1d**, and **2d** are 2322217, 2322218, 2322219, 2322220, and 2322221, respectively.

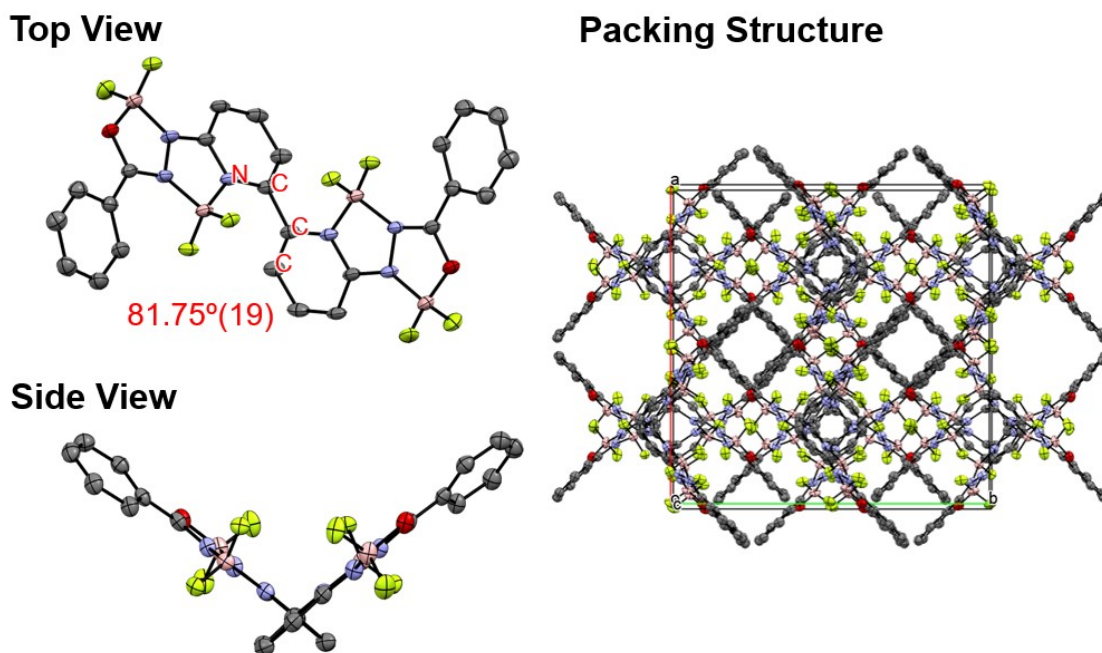

**Figure S9.** Crystal structure and packing mode of **1a** at 123 K determined by X-ray diffraction. Ellipsoids are plotted at the 50% probability level. Hydrogen atoms are omitted for clarity. Color code: C, gray; N, blue; O, red; B, pink; F, yellow-green. The dihedral angle (N–C–C–C) is  $81.75^\circ(19)$ .

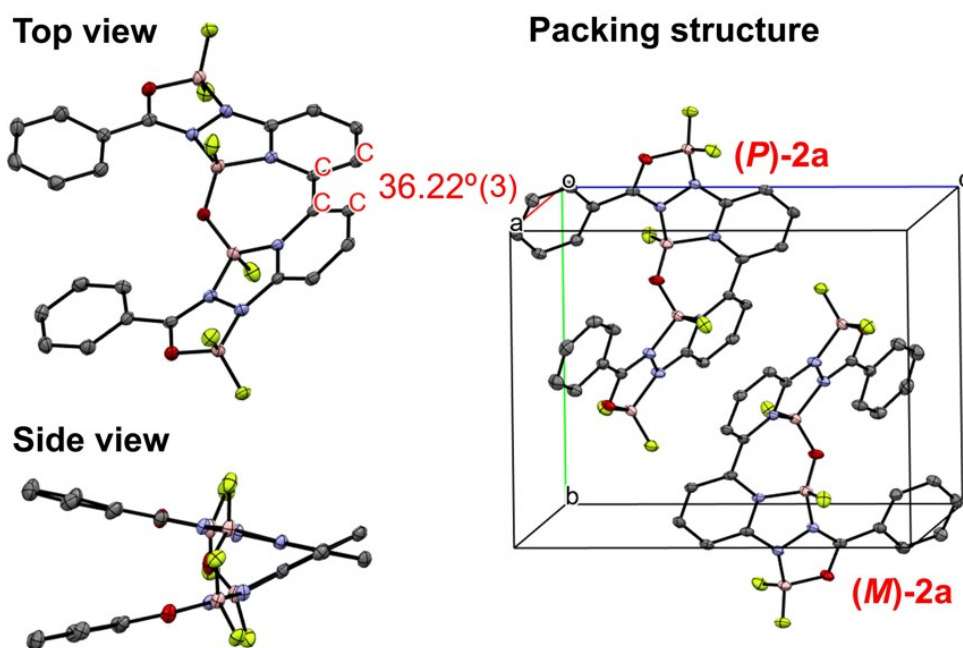

**Figure S10.** Crystal structure and packing mode of **2a** at 100 K determined by X-ray diffraction. Ellipsoids are plotted at the 50% probability level. Hydrogen atoms are omitted for clarity. Color code: C, gray; N, blue; O, red; B, pink; F, yellow-green. The dihedral angle (C–C–C–C) is  $36.22^\circ(3)$ .

**Top view**

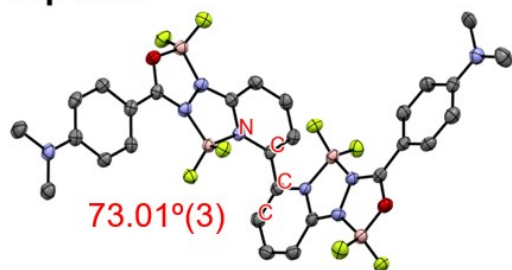

**Side view**

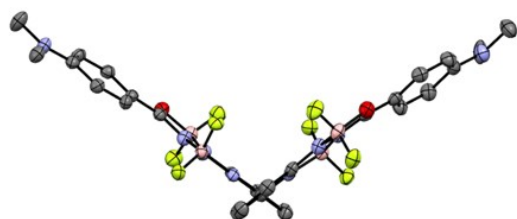

**Packing structure**

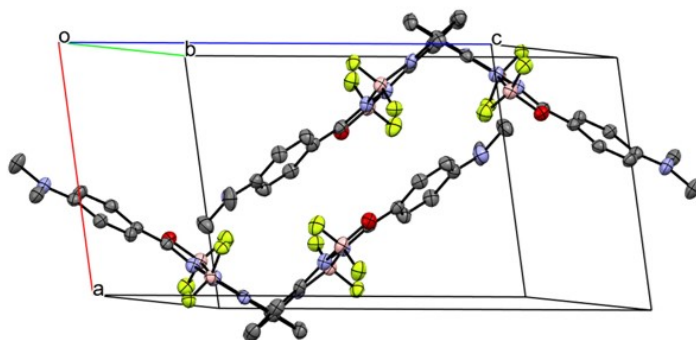

**Figure S11.** Crystal structure and packing mode of **1c** at 123 K determined by X-ray diffraction. Ellipsoids are plotted at the 50% probability level. Hydrogen atoms are omitted for clarity. Color code: C, gray; N, blue; O, red; B, pink; F, yellow-green. The dihedral angle (N–C–C–C) is  $73.01^\circ(3)$ .

**Top View**

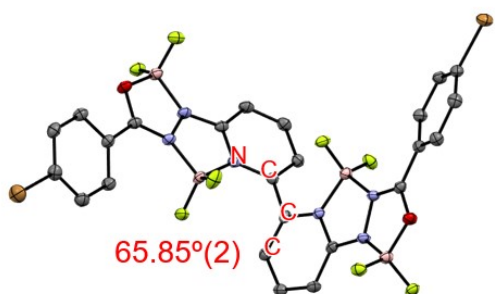

**Side View**

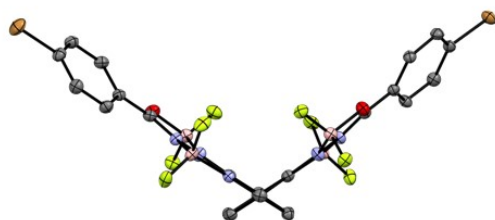

**Packing Structure**

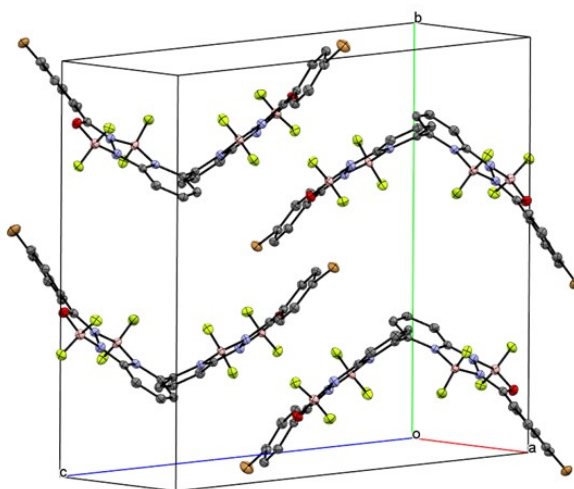

**Figure S12.** Crystal structure and packing mode of **1d** at 123 K determined by X-ray diffraction. Ellipsoids are plotted at the 50% probability level. Hydrogen atoms and solvent molecules ( $\text{CH}_2\text{Cl}_2$ ) are omitted for clarity. Color code: C, gray; N, blue; O, red; Br, brown; B, pink; F, yellow-green. The

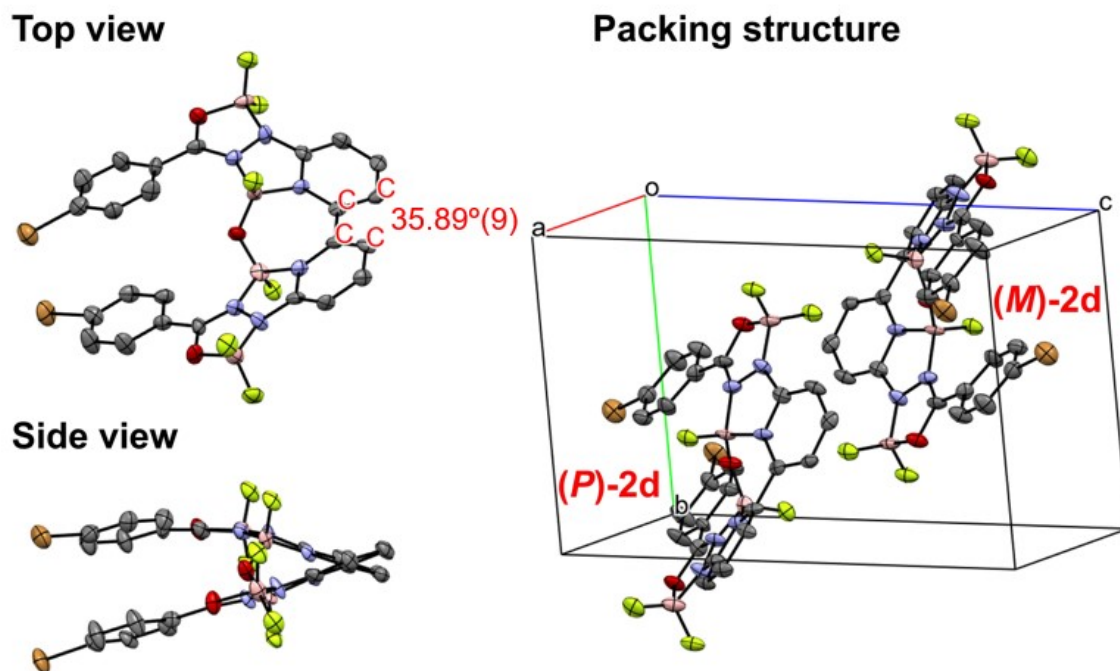

dihedral angle (N-C-C-C) is  $65.85^\circ(2)$ .

**Figure S13.** Crystal structure and packing mode of **2d** at 123 K determined by X-ray diffraction. Ellipsoids are plotted at the 50% probability level. Hydrogen atoms are omitted for clarity. Color code: C, gray; N, blue; O, red; Br, brown; B, pink; F, yellow-green. The dihedral angle (C-C-C-C) is  $35.89^\circ(9)$ .

**Table S1.** Crystallographic data for **1a** at 100 K determined by X-ray diffraction.

| Compound                                         | <b>1a</b>                                                                                   |
|--------------------------------------------------|---------------------------------------------------------------------------------------------|
| CCDC No.                                         | 2322217                                                                                     |
| empirical formula                                | C <sub>24</sub> H <sub>16</sub> B <sub>4</sub> F <sub>8</sub> N <sub>6</sub> O <sub>2</sub> |
| formula weight                                   | 615.67                                                                                      |
| temperature [K]                                  | 100                                                                                         |
| wavelength [Å]                                   | 1.54184                                                                                     |
| crystal system                                   | tetragonal                                                                                  |
| space group                                      | I4 <sub>1</sub> /acd                                                                        |
| <i>a</i> [Å]                                     | 18.9140(2)                                                                                  |
| <i>b</i> [Å]                                     | 18.9140(2)                                                                                  |
| <i>c</i> [Å]                                     | 27.7587(4)                                                                                  |
| $\alpha$ [°]                                     | 90                                                                                          |
| $\beta$ [°]                                      | 90                                                                                          |
| $\gamma$ [°]                                     | 90                                                                                          |
| Volume [Å <sup>3</sup> ]                         | 9930.4(3)                                                                                   |
| <i>Z</i>                                         | 16                                                                                          |
| Density (calculated) [g/cm <sup>3</sup> ]        | 1.647                                                                                       |
| Absorption coefficient [mm <sup>-1</sup> ]       | 1.283                                                                                       |
| <i>F</i> (000)                                   | 4960.0                                                                                      |
| $\theta$ [°]                                     | 4.091 to 75.976                                                                             |
| Reflections collected                            | 16042                                                                                       |
| Independent reflections                          | 2542 [ <i>R</i> <sub>int</sub> = 0.0276, <i>R</i> <sub>sigma</sub> = 0.0185]                |
| Data/restraints/parameters                       | 2542/0/199                                                                                  |
| Goodness-of-fit on <i>F</i> <sup>2</sup>         | 1.081                                                                                       |
| <i>R</i> 1 [ <i>I</i> > 2σ( <i>I</i> )]          | 0.0418                                                                                      |
| <i>wR</i> 2 (all data)                           | 0.1270                                                                                      |
| Largest diff. peak and hole [e.Å <sup>-3</sup> ] | 0.44/-0.24                                                                                  |

**Table S2.** Crystallographic data for **2a** at 100 K determined by X-ray diffraction.

| Compound                                         | <b>2a</b>                                                                                   |
|--------------------------------------------------|---------------------------------------------------------------------------------------------|
| CCDC No.                                         | 2322218                                                                                     |
| empirical formula                                | C <sub>24</sub> H <sub>16</sub> B <sub>4</sub> F <sub>6</sub> N <sub>6</sub> O <sub>3</sub> |
| formula weight                                   | 593.67                                                                                      |
| temperature [K]                                  | 100                                                                                         |
| wavelength [Å]                                   | 0.71073                                                                                     |
| crystal system                                   | triclinic                                                                                   |
| space group                                      | P-1                                                                                         |
| <i>a</i> [Å]                                     | 8.4265(4)                                                                                   |
| <i>b</i> [Å]                                     | 10.5693(4)                                                                                  |
| <i>c</i> [Å]                                     | 13.8392(6)                                                                                  |
| $\alpha$ [°]                                     | 89.215(3)                                                                                   |
| $\beta$ [°]                                      | 85.014(4)                                                                                   |
| $\gamma$ [°]                                     | 79.567(3)                                                                                   |
| Volume [Å <sup>3</sup> ]                         | 1207.58(9)                                                                                  |
| <i>Z</i>                                         | 2                                                                                           |
| Density (calculated) [g/cm <sup>3</sup> ]        | 1.633                                                                                       |
| Absorption coefficient [mm <sup>-1</sup> ]       | 0.139                                                                                       |
| <i>F</i> (000)                                   | 600.0                                                                                       |
| $\theta$ [°]                                     | 2.451 to 27.499                                                                             |
| Reflections collected                            | 7777                                                                                        |
| Independent reflections                          | 7777 [R <sub>int</sub> = ?, R <sub>sigma</sub> = 0.0366]                                    |
| Data/restraints/parameters                       | 7777/0/389                                                                                  |
| Goodness-of-fit on <i>F</i> <sup>2</sup>         | 1.039                                                                                       |
| <i>R</i> 1 [ <i>I</i> > 2σ( <i>I</i> )]          | 0.0443                                                                                      |
| <i>wR</i> 2 (all data)                           | 0.1183                                                                                      |
| Largest diff. peak and hole [e.Å <sup>-3</sup> ] | 0.27/-0.30                                                                                  |

**Table S3.** Crystallographic data for **1c** at 123 K determined by X-ray diffraction.

| Compound                                         | <b>1c</b>                                                                                   |
|--------------------------------------------------|---------------------------------------------------------------------------------------------|
| CCDC No.                                         | 2322219                                                                                     |
| empirical formula                                | C <sub>28</sub> H <sub>26</sub> B <sub>4</sub> F <sub>8</sub> N <sub>8</sub> O <sub>2</sub> |
| formula weight                                   | 701.81                                                                                      |
| temperature [K]                                  | 123                                                                                         |
| wavelength [Å]                                   | 0.71073                                                                                     |
| crystal system                                   | triclinic                                                                                   |
| space group                                      | P-1                                                                                         |
| <i>a</i> [Å]                                     | 9.2962(7)                                                                                   |
| <i>b</i> [Å]                                     | 9.8661(7)                                                                                   |
| <i>c</i> [Å]                                     | 17.0113(12)                                                                                 |
| $\alpha$ [°]                                     | 84.337(6)                                                                                   |
| $\beta$ [°]                                      | 83.855(6)                                                                                   |
| $\gamma$ [°]                                     | 80.627(6)                                                                                   |
| Volume [Å <sup>3</sup> ]                         | 1525.30(19)                                                                                 |
| <i>Z</i>                                         | 2                                                                                           |
| Density (calculated) [g/cm <sup>3</sup> ]        | 1.528                                                                                       |
| Absorption coefficient [mm <sup>-1</sup> ]       | 0.131                                                                                       |
| <i>F</i> (000)                                   | 716.0                                                                                       |
| $\theta$ [°]                                     | 2.508 to 26.368                                                                             |
| Reflections collected                            | 16242                                                                                       |
| Independent reflections                          | 6239 [ <i>R</i> <sub>int</sub> = 0.0496, <i>R</i> <sub>sigma</sub> = 0.0658]                |
| Data/restraints/parameters                       | 6239/0/455                                                                                  |
| Goodness-of-fit on <i>F</i> <sup>2</sup>         | 1.019                                                                                       |
| <i>R</i> 1 [ <i>I</i> > 2σ( <i>I</i> )]          | 0.0546                                                                                      |
| <i>wR</i> 2 (all data)                           | 0.1479                                                                                      |
| Largest diff. peak and hole [e.Å <sup>-3</sup> ] | 0.51/-0.27                                                                                  |



**Table S4.** Crystallographic data for **1d** at 100 K determined by X-ray diffraction.

| Compound                                         | <b>1d</b>                                                                                                                   |
|--------------------------------------------------|-----------------------------------------------------------------------------------------------------------------------------|
| CCDC No.                                         | 2322220                                                                                                                     |
| empirical formula                                | C <sub>25</sub> H <sub>16</sub> B <sub>4</sub> Br <sub>2</sub> Cl <sub>2</sub> F <sub>8</sub> N <sub>6</sub> O <sub>2</sub> |
| formula weight                                   | 858.40                                                                                                                      |
| temperature [K]                                  | 100                                                                                                                         |
| wavelength [Å]                                   | 1.54184                                                                                                                     |
| crystal system                                   | monoclinic                                                                                                                  |
| space group                                      | P2 <sub>1</sub> /n                                                                                                          |
| <i>a</i> [Å]                                     | 7.36860(10)                                                                                                                 |
| <i>b</i> [Å]                                     | 18.9186(4)                                                                                                                  |
| <i>c</i> [Å]                                     | 21.9266(4)                                                                                                                  |
| $\alpha$ [°]                                     | 90                                                                                                                          |
| $\beta$ [°]                                      | 91.991(2)                                                                                                                   |
| $\gamma$ [°]                                     | 90                                                                                                                          |
| Volume [Å <sup>3</sup> ]                         | 3054.80(9)                                                                                                                  |
| <i>Z</i>                                         | 4                                                                                                                           |
| Density (calculated) [g/cm <sup>3</sup> ]        | 1.866                                                                                                                       |
| Absorption coefficient [mm <sup>-1</sup> ]       | 5.779                                                                                                                       |
| <i>F</i> (000)                                   | 1680.0                                                                                                                      |
| $\theta$ [°]                                     | 3.086 to 76.273                                                                                                             |
| Reflections collected                            | 20800                                                                                                                       |
| Independent reflections                          | 6127 [R <sub>int</sub> = 0.0335, R <sub>sigma</sub> = 0.0343]                                                               |
| Data/restraints/parameters                       | 6127/0/442                                                                                                                  |
| Goodness-of-fit on <i>F</i> <sup>2</sup>         | 1.043                                                                                                                       |
| <i>R</i> 1 [ <i>I</i> > 2σ( <i>I</i> )]          | 0.0301                                                                                                                      |
| <i>wR</i> 2 (all data)                           | 0.0830                                                                                                                      |
| Largest diff. peak and hole [e.Å <sup>-3</sup> ] | 0.56/-0.50                                                                                                                  |

**Table S5.** Crystallographic data for **2d** at 123 K determined by X-ray diffraction.

| Compound                                         | <b>2d</b>                                                                                                   |
|--------------------------------------------------|-------------------------------------------------------------------------------------------------------------|
| CCDC No.                                         | 2322221                                                                                                     |
| empirical formula                                | C <sub>24</sub> H <sub>14</sub> B <sub>4</sub> Br <sub>2</sub> F <sub>6</sub> N <sub>6</sub> O <sub>3</sub> |
| formula weight                                   | 751.47                                                                                                      |
| temperature [K]                                  | 123                                                                                                         |
| wavelength [Å]                                   | 0.71073                                                                                                     |
| crystal system                                   | triclinic                                                                                                   |
| space group                                      | P-1                                                                                                         |
| <i>a</i> [Å]                                     | 8.1074(11)                                                                                                  |
| <i>b</i> [Å]                                     | 10.5772(17)                                                                                                 |
| <i>c</i> [Å]                                     | 15.807(3)                                                                                                   |
| $\alpha$ [°]                                     | 91.309(14)                                                                                                  |
| $\beta$ [°]                                      | 91.058(14)                                                                                                  |
| $\gamma$ [°]                                     | 99.216(13)                                                                                                  |
| Volume [Å <sup>3</sup> ]                         | 1337.3(4)                                                                                                   |
| <i>Z</i>                                         | 2                                                                                                           |
| Density (calculated) [g/cm <sup>3</sup> ]        | 1.866                                                                                                       |
| Absorption coefficient [mm <sup>-1</sup> ]       | 3.116                                                                                                       |
| <i>F</i> (000)                                   | 736.0                                                                                                       |
| $\theta$ [°]                                     | 2.578 to 26.37                                                                                              |
| Reflections collected                            | 12044                                                                                                       |
| Independent reflections                          | 5464 [R <sub>int</sub> = 0.1101, R <sub>sigma</sub> = 0.1811]                                               |
| Data/restraints/parameters                       | 5464/0/406                                                                                                  |
| Goodness-of-fit on <i>F</i> <sup>2</sup>         | 0.987                                                                                                       |
| <i>R</i> 1 [ <i>I</i> > 2σ( <i>I</i> )]          | 0.0756                                                                                                      |
| <i>wR</i> 2 (all data)                           | 0.1877                                                                                                      |
| Largest diff. peak and hole [e.Å <sup>-3</sup> ] | 1.42/-0.70                                                                                                  |

## Optical properties in various solvents

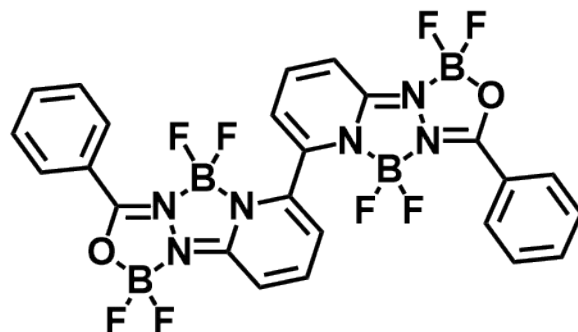

**1a**

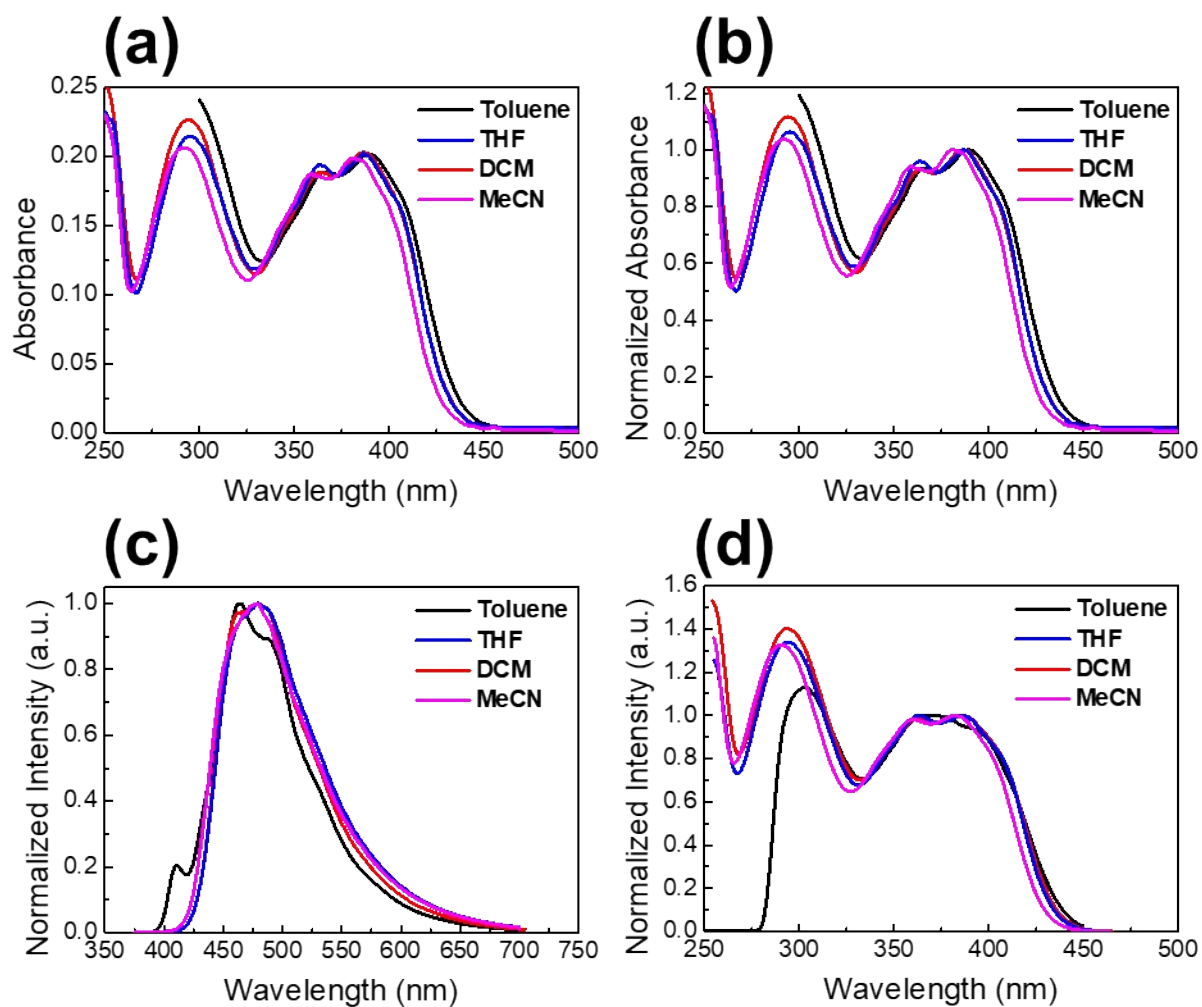

**Figure S14.** (a) UV-vis absorption spectra of **1a** in various solvents ( $c = 10^{-6}$  M). Normalized (b) UV-vis absorption spectra, (c) emission spectra (excited at  $\lambda_{\text{abs}}^{\text{max}}$ ), and (d) excitation spectra (emission wavelength at  $\lambda_{\text{em}}^{\text{max}}$ ) of **1a** in various solvents ( $c = 10^{-6}$  M).

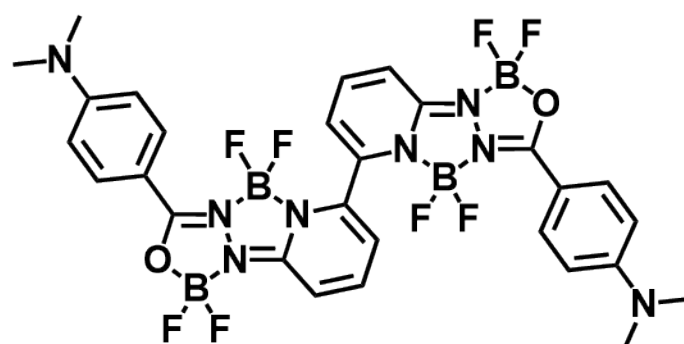

**1c**

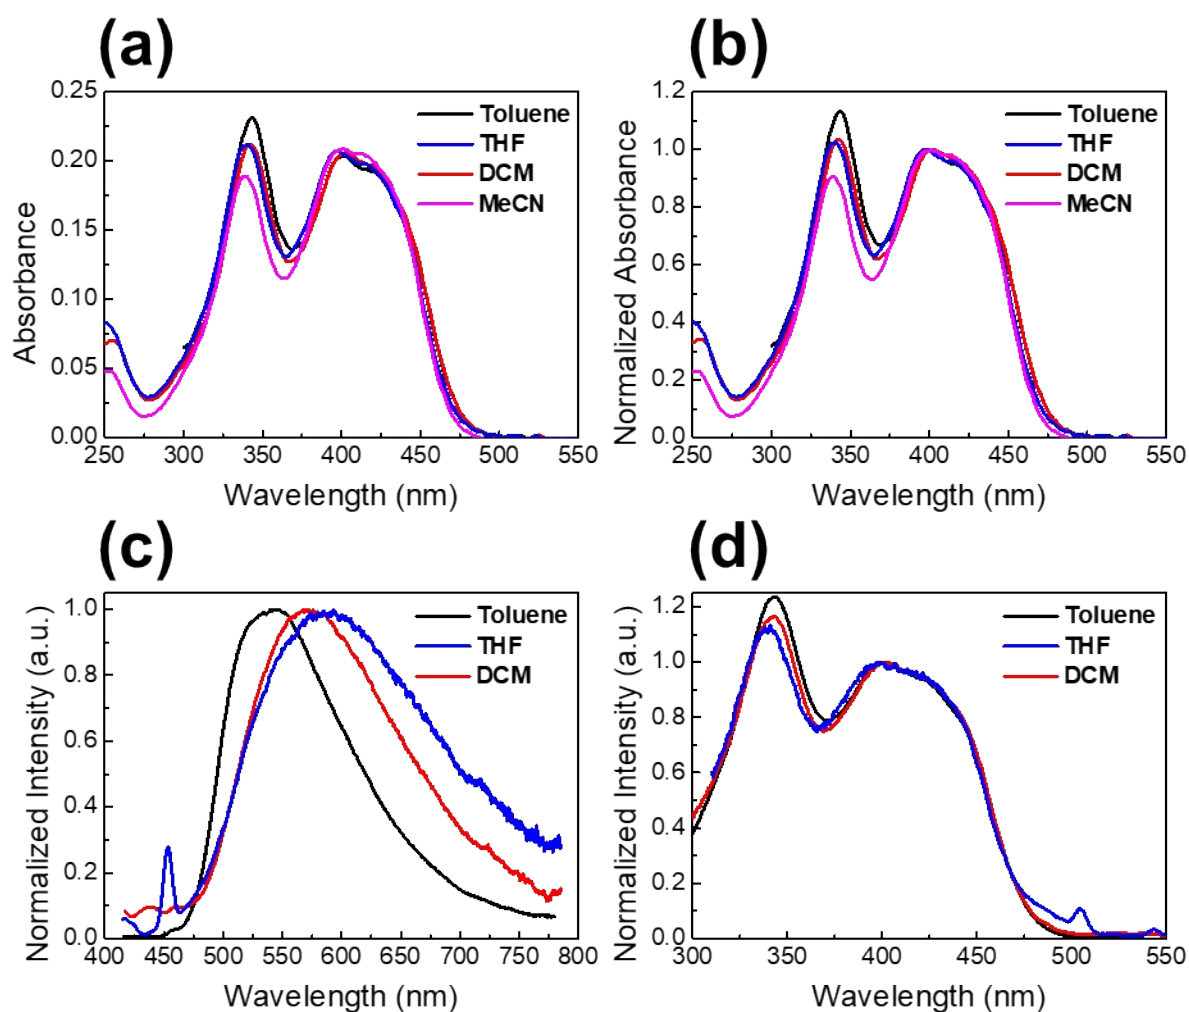

**Figure S15.** (a) UV-vis absorption spectra of **1c** in various solvents ( $c = 10^{-6}$  M). Normalized (b) UV-vis absorption spectra, (c) emission spectra (excited at  $\lambda_{\text{abs}}^{\text{max}}$ ), and (d) excitation spectra (emission wavelength at  $\lambda_{\text{em}}^{\text{max}}$ ) of **1c** in various solvents ( $c = 10^{-6}$  M).

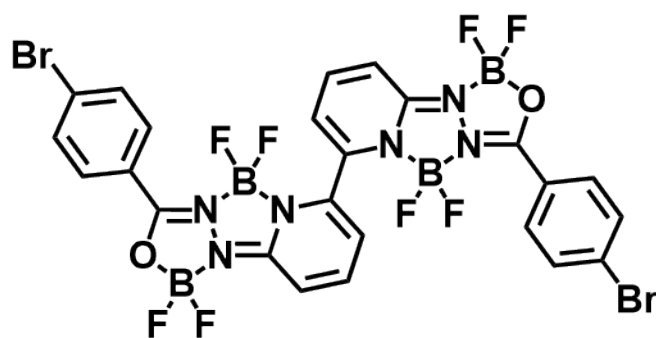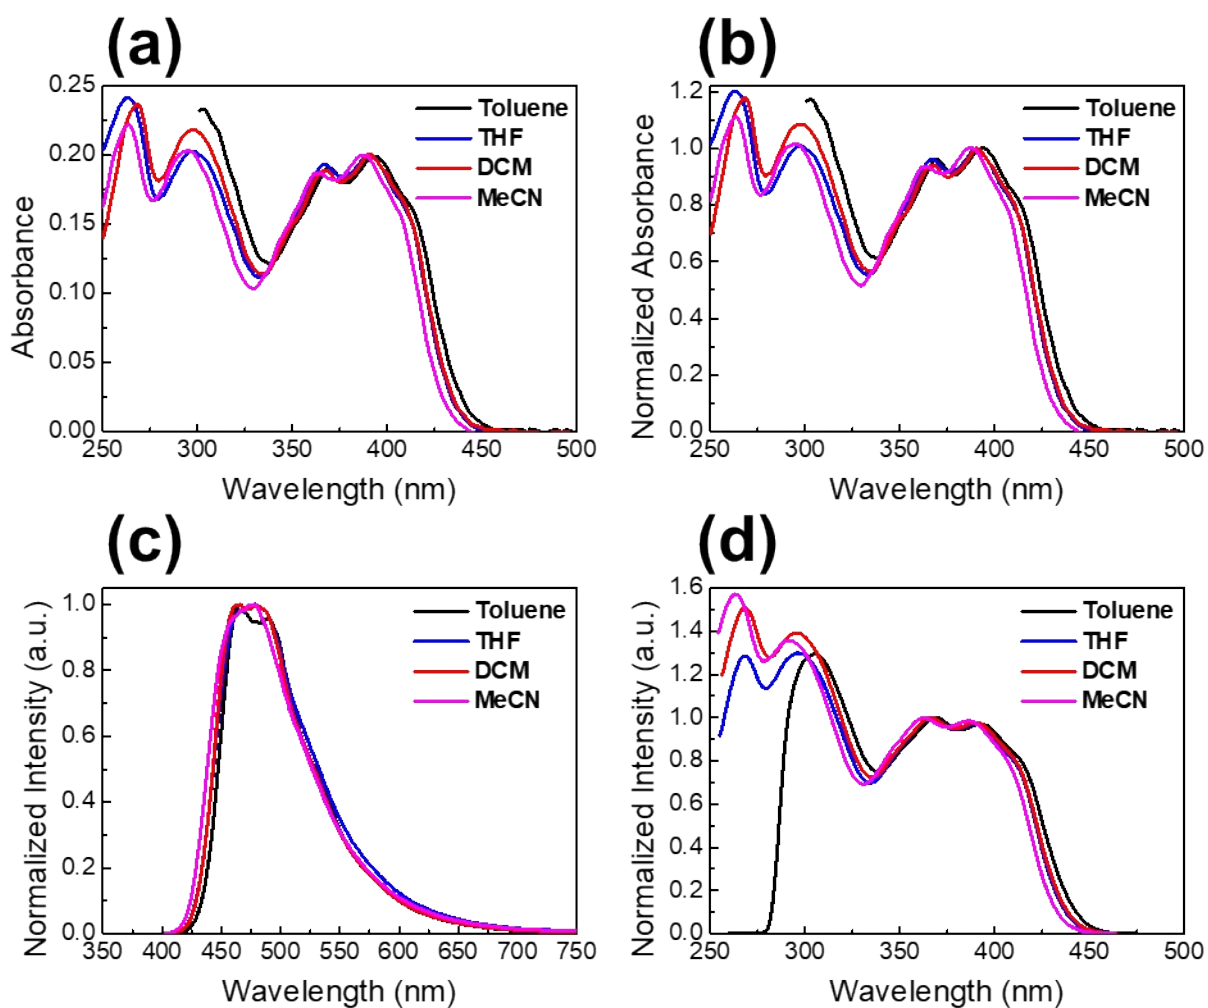

**Figure S16.** (a) UV-vis absorption spectra of **1d** in various solvents ( $c = 10^{-6}$  M). Normalized (b) UV-vis absorption spectra, (c) emission spectra (excited at  $\lambda_{\text{abs}}^{\text{max}}$ ), and (d) excitation spectra (emission wavelength at  $\lambda_{\text{em}}^{\text{max}}$ ) of **1d** in various solvents ( $c = 10^{-6}$  M).

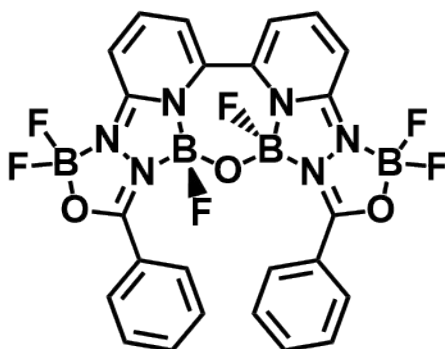

**2a**

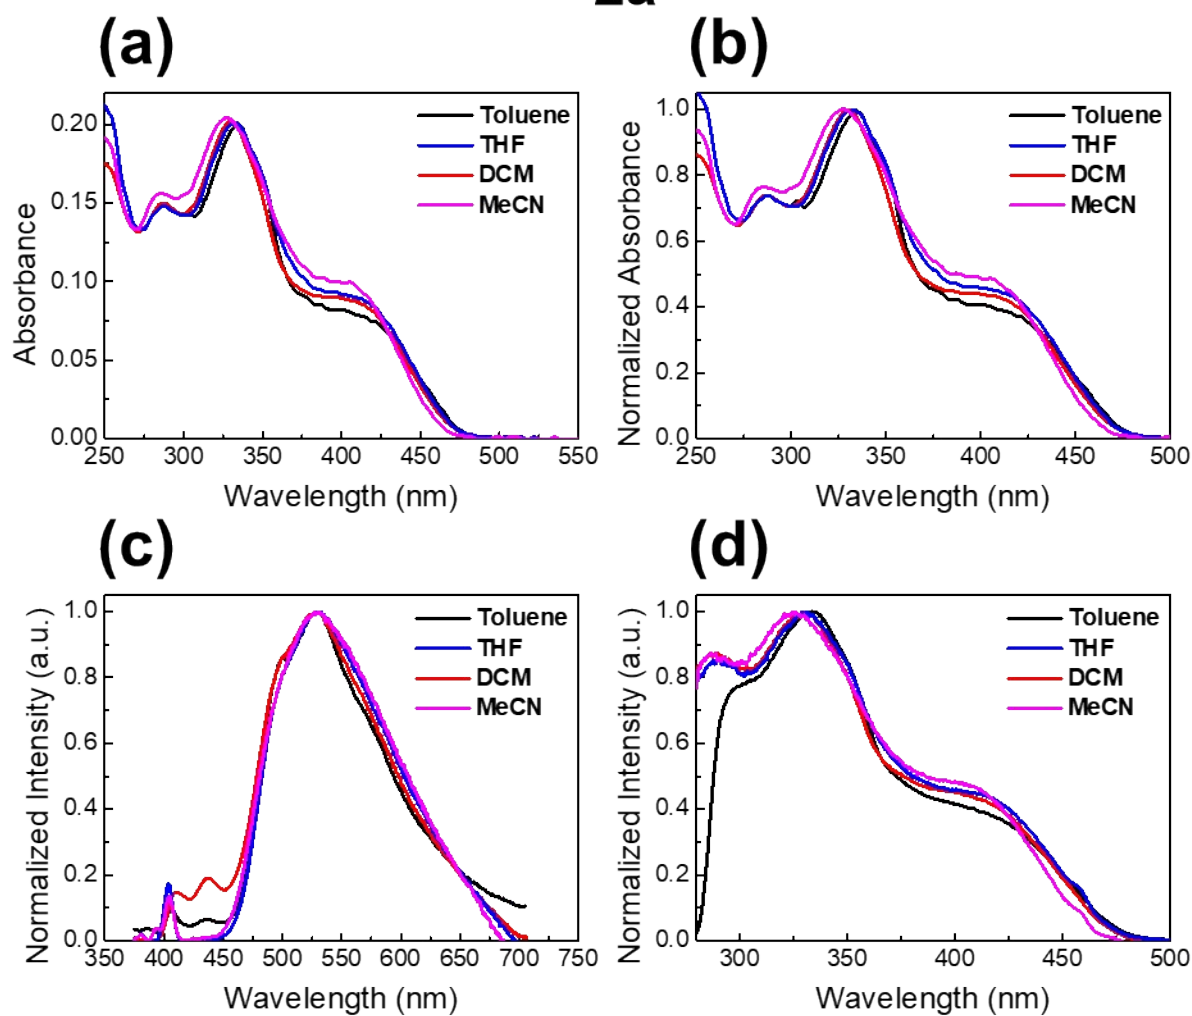

**Figure S17.** (a) UV-vis absorption spectra of **2a** in various solvents ( $c = 10^{-6}$  M). Normalized (b) UV-vis absorption spectra, (c) emission spectra (excited at  $\lambda_{\text{abs}}^{\text{max}}$ ), and (d) excitation spectra (emission wavelength at  $\lambda_{\text{em}}^{\text{max}}$ ) of **2a** in various solvents ( $c = 10^{-6}$  M).

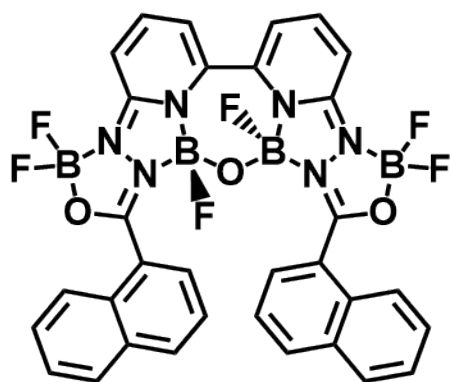

**2b**

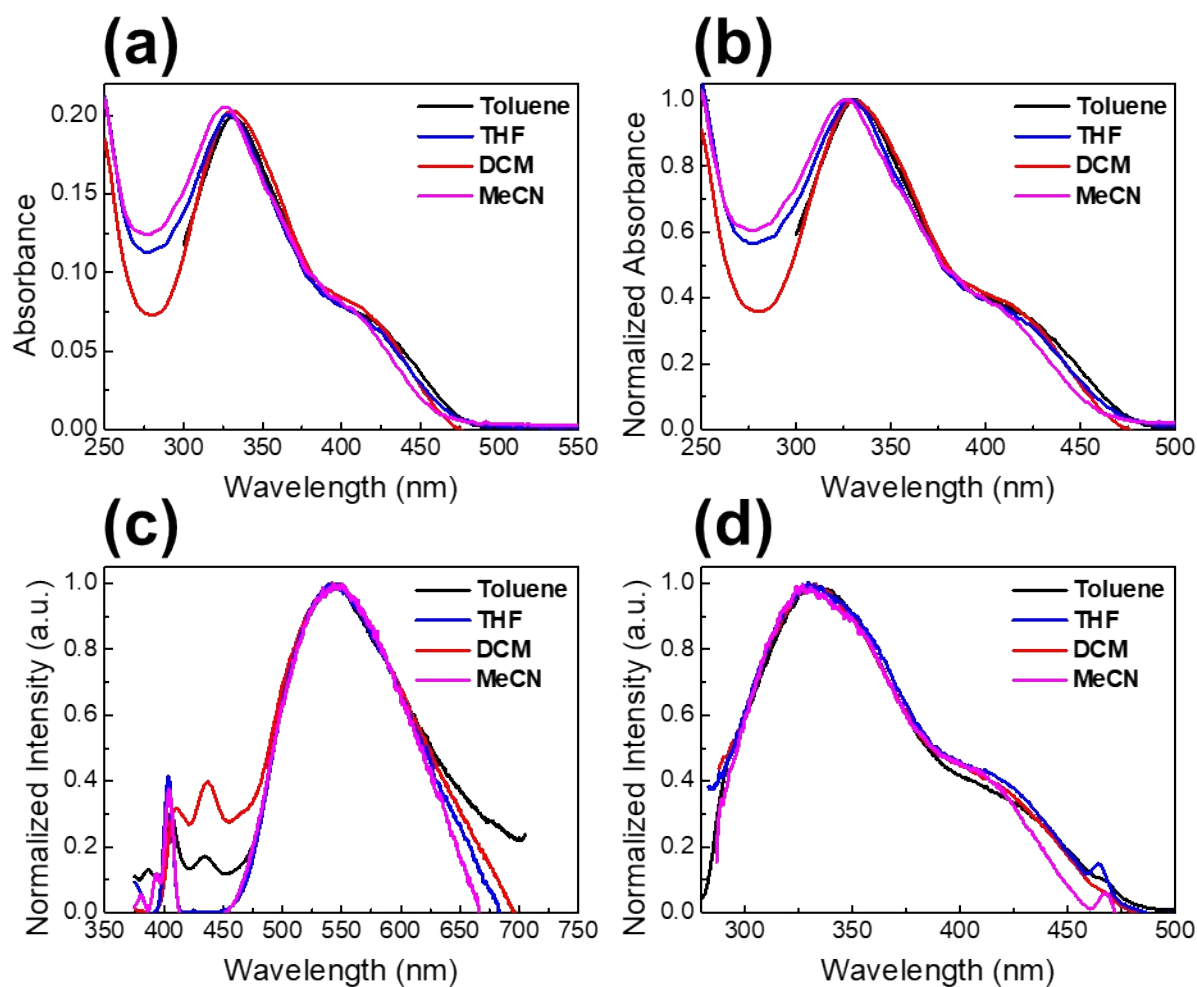

**Figure S18.** (a) UV-vis absorption spectra of **2b** in various solvents ( $c = 10^{-6}$  M). Normalized (b) UV-vis absorption spectra, (c) emission spectra (excited at  $\lambda_{\text{abs}}^{\text{max}}$ ), and (d) excitation spectra (emission wavelength at  $\lambda_{\text{em}}^{\text{max}}$ ) of **2b** in various solvents ( $c = 10^{-6}$  M).

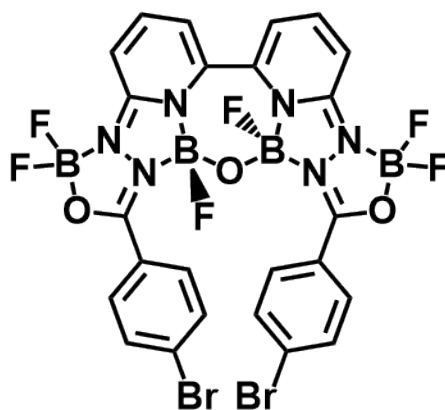

**2d**

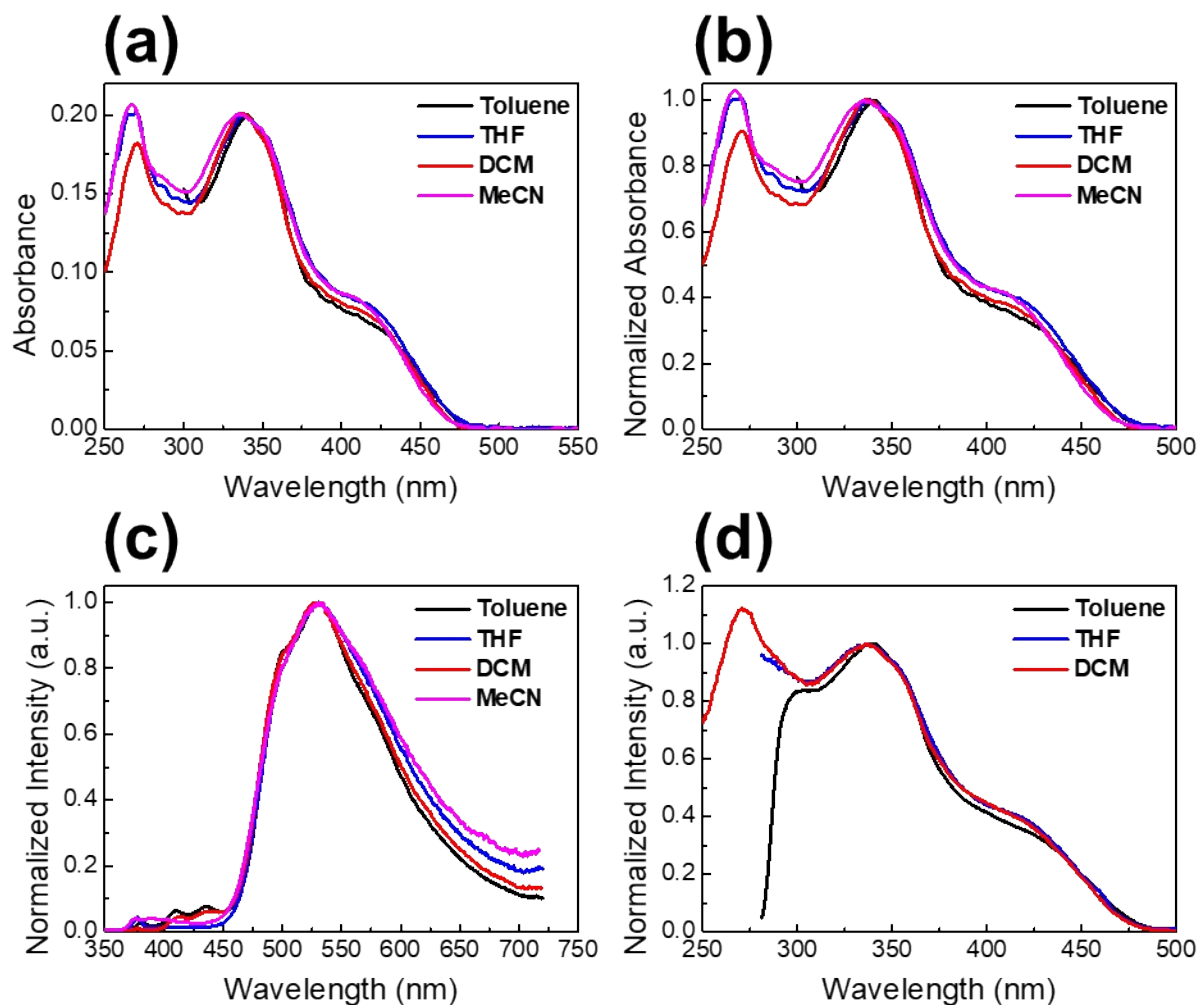

**Figure S19.** (a) UV-vis absorption spectra of **2d** in various solvents ( $c = 10^{-6}$  M). Normalized (b) UV-vis absorption spectra, (c) emission spectra (excited at  $\lambda_{\text{abs}}^{\text{max}}$ ), and (d) excitation spectra (emission wavelength at  $\lambda_{\text{em}}^{\text{max}}$ ) of **2d** in various solvents ( $c = 10^{-6}$  M).



**Table S6.** Photophysical properties of all compounds in various solvents.

| Compd. <sup>[a]</sup> | Solvent | $\lambda_{\text{abs}}^{\text{max}} / \text{nm}^{\text{[b]}}$ | $\lambda_{\text{em}}^{\text{max}} / \text{nm}^{\text{[c]}}$ | $\Phi_{\text{PL}}^{\text{[d]}}$ | $\tau_{\text{av}} / \text{ns}$ | Stokes shift / $\text{cm}^{-1}$ |
|-----------------------|---------|--------------------------------------------------------------|-------------------------------------------------------------|---------------------------------|--------------------------------|---------------------------------|
| <b>1a</b>             | Toluene | 390                                                          | 465, 487                                                    | 0.23                            | 1.64                           | 4100                            |
|                       | THF     | 295, 363, 387                                                | 479                                                         | 0.088                           | 1.18                           | 5000                            |
|                       | DCM     | 294, 364, 386                                                | 466, 480                                                    | 0.20                            | 1.66                           | 4400                            |
|                       | MeCN    | 292, 359, 384                                                | 478                                                         | 0.088                           | 1.14                           | 5100                            |
| <b>1c</b>             | Toluene | 344, 401                                                     | 545                                                         | 0.040                           | 0.36                           | 6600                            |
|                       | THF     | 341, 399                                                     | 585, 593                                                    | 0.007                           | 0.16                           | 8000, 8200                      |
|                       | DCM     | 342, 402                                                     | 570                                                         | 0.012                           | 0.13                           | 7300                            |
|                       | MeCN    | 339, 401                                                     | —                                                           | —                               | —                              | —                               |
| <b>1d</b>             | Toluene | 393                                                          | 466, 489                                                    | 0.27                            | 2.12                           | 4000, 5000                      |
|                       | THF     | 391                                                          | 467, 479                                                    | 0.13                            | 1.53                           | 4200, 4700                      |
|                       | DCM     | 391                                                          | 466, 479                                                    | 0.24                            | 2.06                           | 4100, 4700                      |
|                       | MeCN    | 388                                                          | 478                                                         | 0.15                            | 1.57                           | 4900                            |
| <b>2a</b>             | Toluene | 334                                                          | 530                                                         | 0.039                           | 0.50                           | 11100                           |
|                       | THF     | 286, 333                                                     | 530                                                         | 0.013                           | 0.078                          | 11200                           |
|                       | DCM     | 286, 330                                                     | 531                                                         | 0.018                           | 0.25                           | 11500                           |
|                       | MeCN    | 285, 328                                                     | 531                                                         | 0.010                           | 0.12                           | 11700                           |
| <b>2b</b>             | Toluene | 332                                                          | 545                                                         | 0.017                           | 0.24                           | 11800                           |
|                       | THF     | 328                                                          | 539                                                         | 0.010                           | 0.094                          | 11900                           |
|                       | DCM     | 330                                                          | 545                                                         | 0.011                           | 0.065                          | 12000                           |
|                       | MeCN    | 327                                                          | 543                                                         | 0.009                           | 0.11                           | 12200                           |
| <b>2d</b>             | Toluene | 340                                                          | 531                                                         | 0.078                           | 0.59                           | 10600                           |
|                       | THF     | 338                                                          | 534                                                         | 0.031                           | 0.21                           | 10900                           |
|                       | DCM     | 336                                                          | 532                                                         | 0.018                           | 0.38                           | 11000                           |
|                       | MeCN    | 335                                                          | 534                                                         | 0.013                           | 0.15                           | 11000                           |

[a]  $c = 10^{-6}$  M in solutions. [b] Absorption maxima. [c] Emission maxima, excited at  $\lambda_{\text{abs}}^{\text{max}}$ . [d] Absolute photoluminescence quantum yields, excited at  $\lambda_{\text{abs}}^{\text{max}}$ .



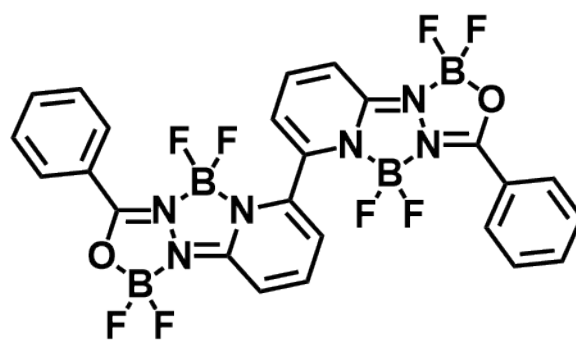

**1a**

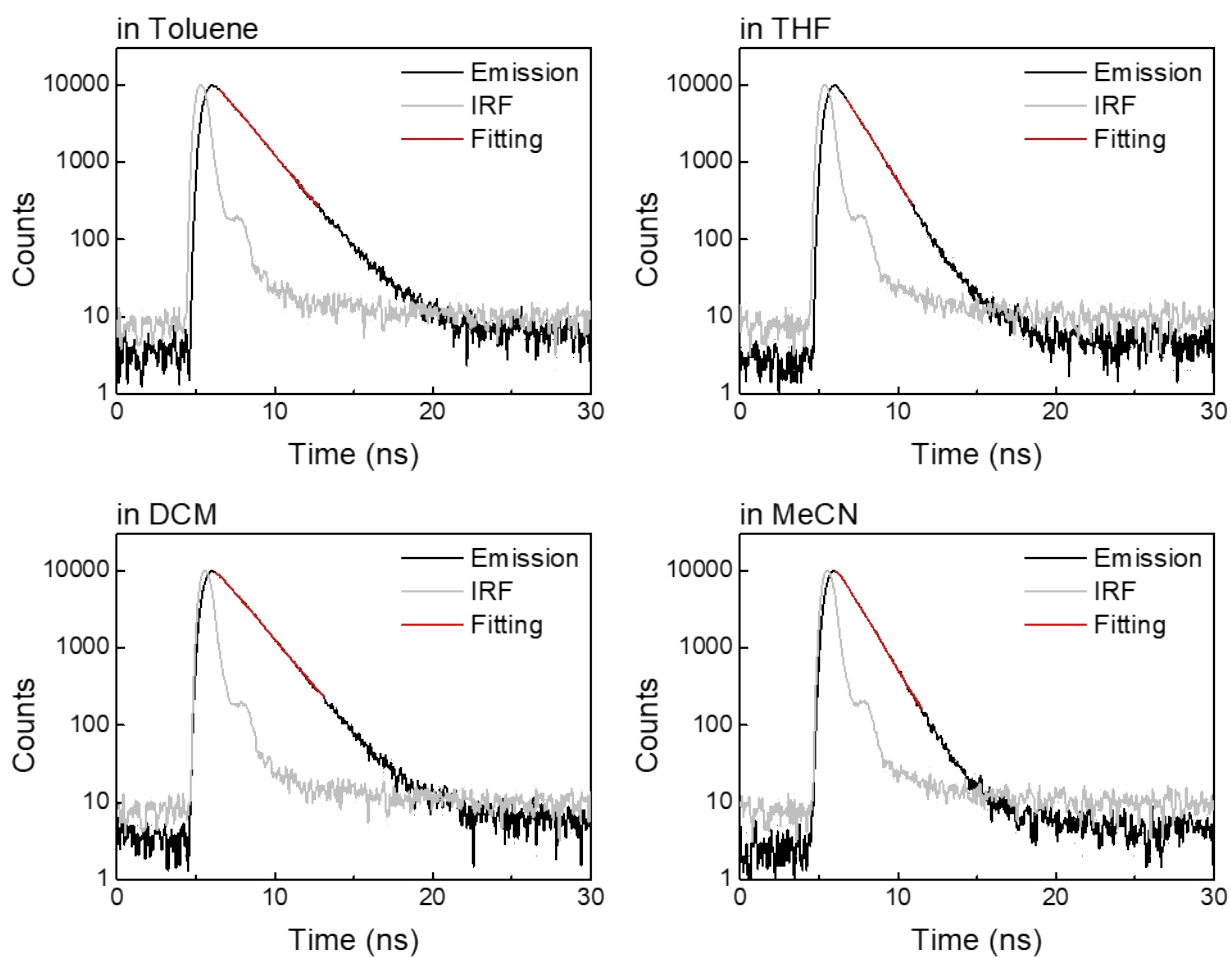

**Figure S20.** Emission decay curves (black line), fits (red line), and instrument response function (IRF) (gray line) of **1a** in various solvents. Excited at 365 nm and emission wavelength at  $\lambda_{\text{em}}^{\text{max}}$ .

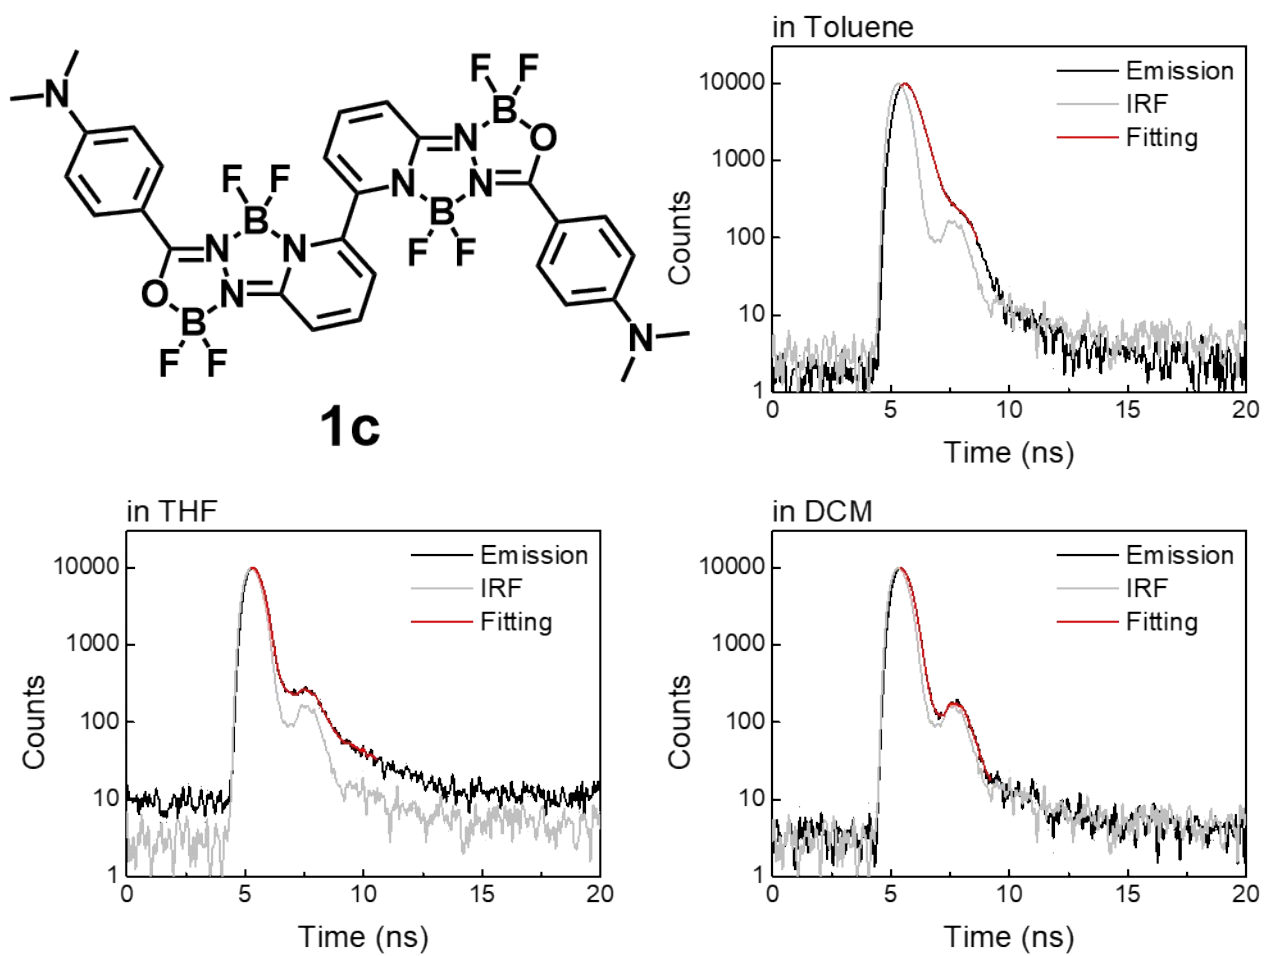

**Figure S21.** Emission decay curves (black line), fits (red line), and instrument response function (IRF) (gray line) of **1c** in various solvents. Excited at 405 nm and emission wavelength at  $\lambda_{em}^{max}$ .

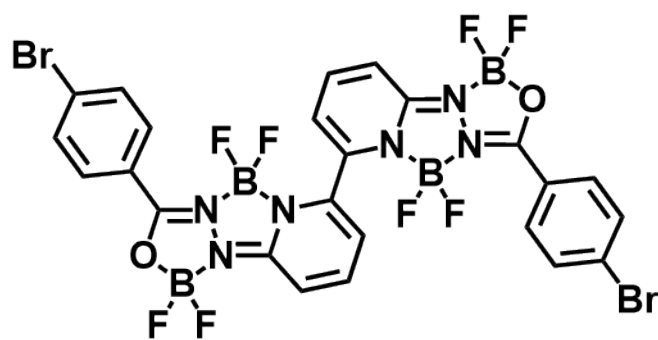

**1d**

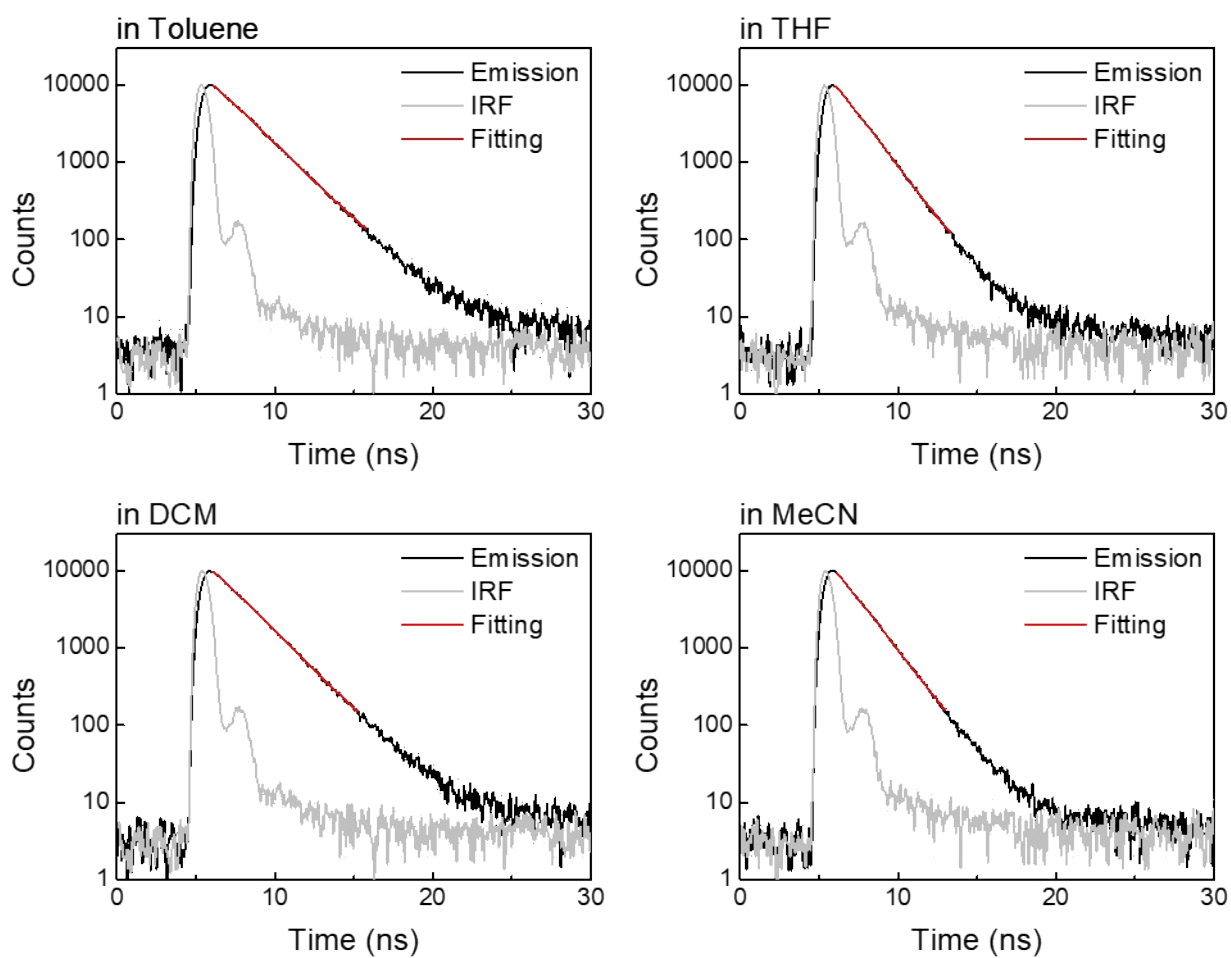

**Figure S22.** Emission decay curves (black line), fits (red line), and instrument response function (IRF) (gray line) of **1d** in various solvents. Excited at 405 nm and emission wavelength at  $\lambda_{em}^{max}$ .

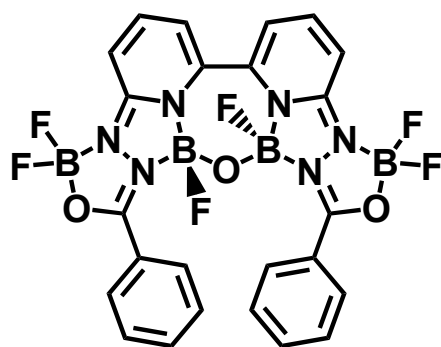

**2a**

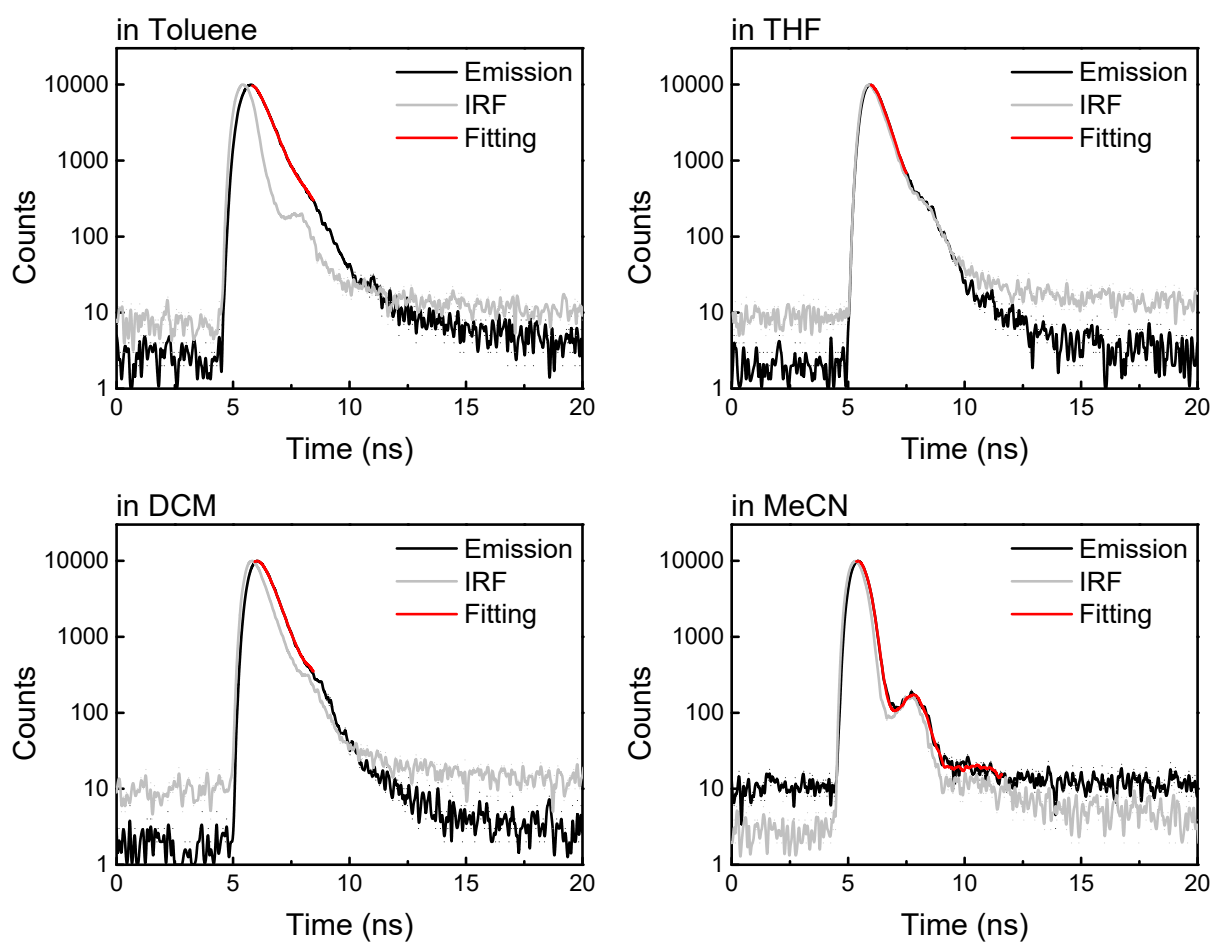

**Figure S23.** Emission decay curves (black line), fits (red line), and instrument response function (IRF) (gray line) of **2a** in various solvents.

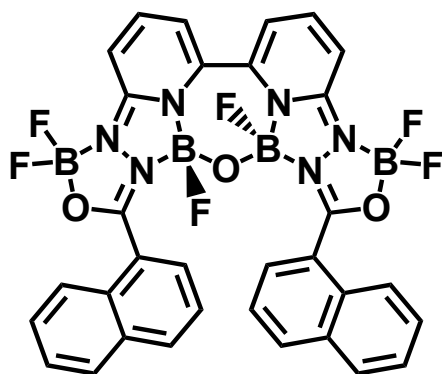

**2b**

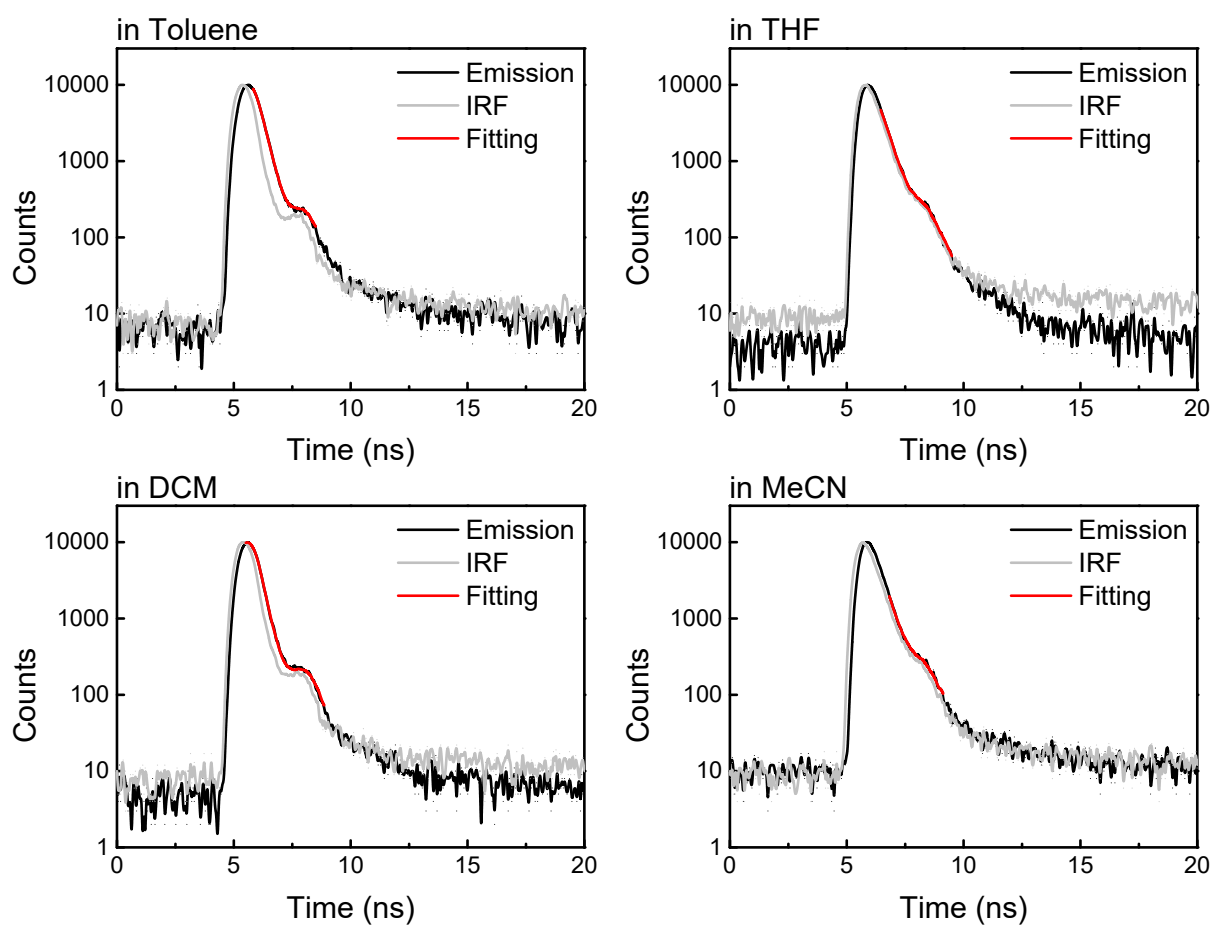

**Figure S24.** Emission decay curves (black line), fits (red line), and instrument response function (IRF) (gray line) of **2b** in various solvents. Excited at 340 or 365 nm and emission wavelength at  $\lambda_{em}^{max}$ .

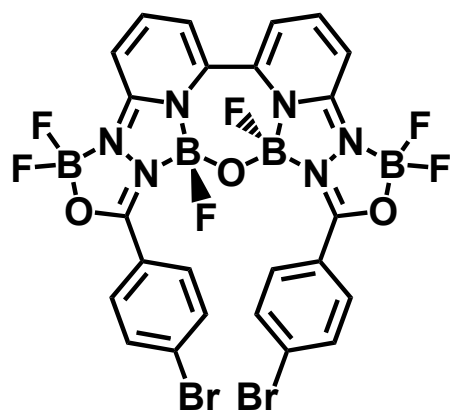

**2d**

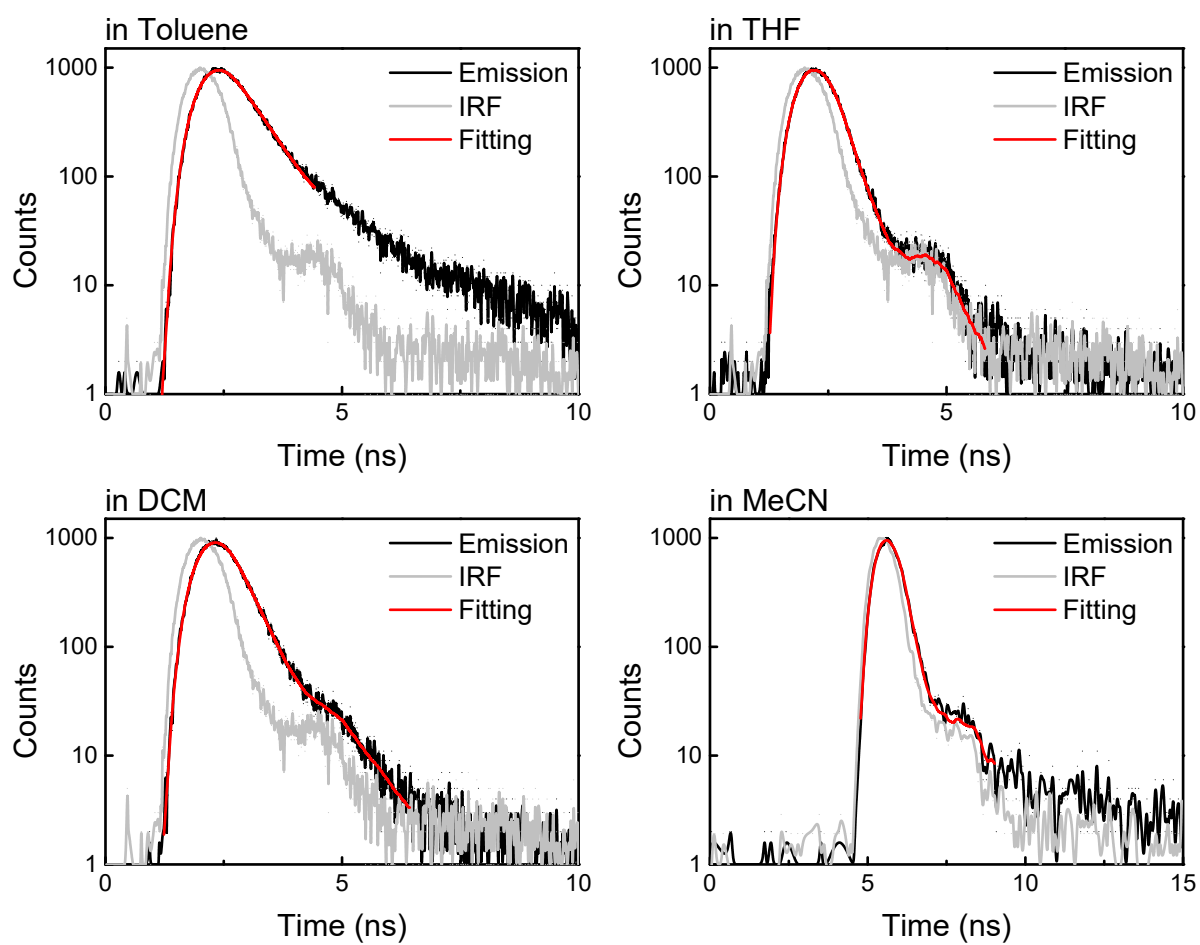

**Figure S25.** Emission decay curves (black line), fits (red line), and instrument response function (IRF) (gray line) of **2d** in various solvents. Excited at 365 nm and emission wavelength at  $\lambda_{em}^{max}$ .



**Table S7.** Summary of lifetime analyses for all compounds in various solvents. Emission lifetimes ( $\tau$ ), pre-exponential factor (A) and intensity average lifetime ( $\tau_{av}$ ).

| Compd.    | Solvent | $\lambda_{ex} / \text{nm}^{[a]}$ | $\lambda_{em} / \text{nm}^{[b]}$ | CHI  | $\tau_{av} / \text{ns}$ | $\tau_1 / \text{ns}$ | $\tau_2 / \text{ns}$ | $A_1$   | $A_2$ |
|-----------|---------|----------------------------------|----------------------------------|------|-------------------------|----------------------|----------------------|---------|-------|
| <b>1a</b> | Toluene | 365                              | 465                              | 1.09 | 1.64                    | 1.64                 | —                    | 960.01  | —     |
|           | THF     | 365                              | 479                              | 1.13 | 1.18                    | 1.18                 | —                    | 1068.65 | —     |
|           | DCM     | 365                              | 466                              | 1.12 | 1.66                    | 1.66                 | —                    | 827.87  | —     |
|           | MeCN    | 365                              | 478                              | 1.09 | 1.14                    | 1.14                 | —                    | 976.95  | —     |
| <b>1c</b> | Toluene | 405                              | 545                              | 1.00 | 0.36                    | 0.36                 | —                    | 1869.93 | —     |
|           | THF     | 405                              | 585                              | 1.14 | 0.16                    | 0.072                | 1.52                 | 7081.42 | 22.64 |
|           | DCM     | 405                              | 570                              | 1.10 | 0.13                    | 0.12                 | 0.79                 | 4474.58 | 10.94 |
| <b>1d</b> | Toluene | 405                              | 466                              | 1.16 | 2.12                    | 2.12                 | —                    | 853.17  | —     |
|           | THF     | 405                              | 467                              | 1.02 | 1.53                    | 1.53                 | —                    | 934.44  | —     |
|           | DCM     | 405                              | 479                              | 1.07 | 2.06                    | 2.06                 | —                    | 828.32  | —     |
|           | MeCN    | 405                              | 478                              | 1.13 | 1.57                    | 1.57                 | —                    | 898.91  | —     |
| <b>2a</b> | Toluene | 365                              | 530                              | 1.12 | 0.50                    | 0.50                 | —                    | 1475.52 | —     |
|           | THF     | 340                              | 530                              | 1.09 | 0.078                   | 0.078                | —                    | 6553.13 | —     |
|           | DCM     | 340                              | 531                              | 1.10 | 0.23                    | 0.23                 | —                    | 2521.77 | —     |
|           | MeCN    | 405                              | 531                              | 1.08 | 0.12                    | 0.12                 | —                    | 4405.53 | —     |
| <b>2b</b> | Toluene | 365                              | 545                              | 1.03 | 0.24                    | 0.24                 | —                    | 2571.82 | —     |
|           | THF     | 340                              | 539                              | 1.05 | 0.094                   | 0.094                | —                    | 5481.76 | —     |
|           | DCM     | 365                              | 545                              | 1.08 | 0.17                    | 0.17                 | —                    | 3230.74 | —     |
|           | MeCN    | 340                              | 543                              | 1.02 | 0.11                    | 0.11                 | —                    | 4783.96 | —     |
| <b>2d</b> | Toluene | 365                              | 531                              | 1.02 | 0.59                    | 0.59                 | —                    | 28.49   | —     |
|           | THF     | 365                              | 534                              | 1.00 | 0.21                    | 0.21                 | —                    | 59.81   | —     |
|           | DCM     | 365                              | 532                              | 1.04 | 0.38                    | 0.38                 | —                    | 35.84   | —     |
|           | MeCN    | 365                              | 532                              | 1.12 | 0.15                    | 0.15                 | —                    | 349.71  | —     |

[a] Excitation wavelength. [b] Emission wavelength.

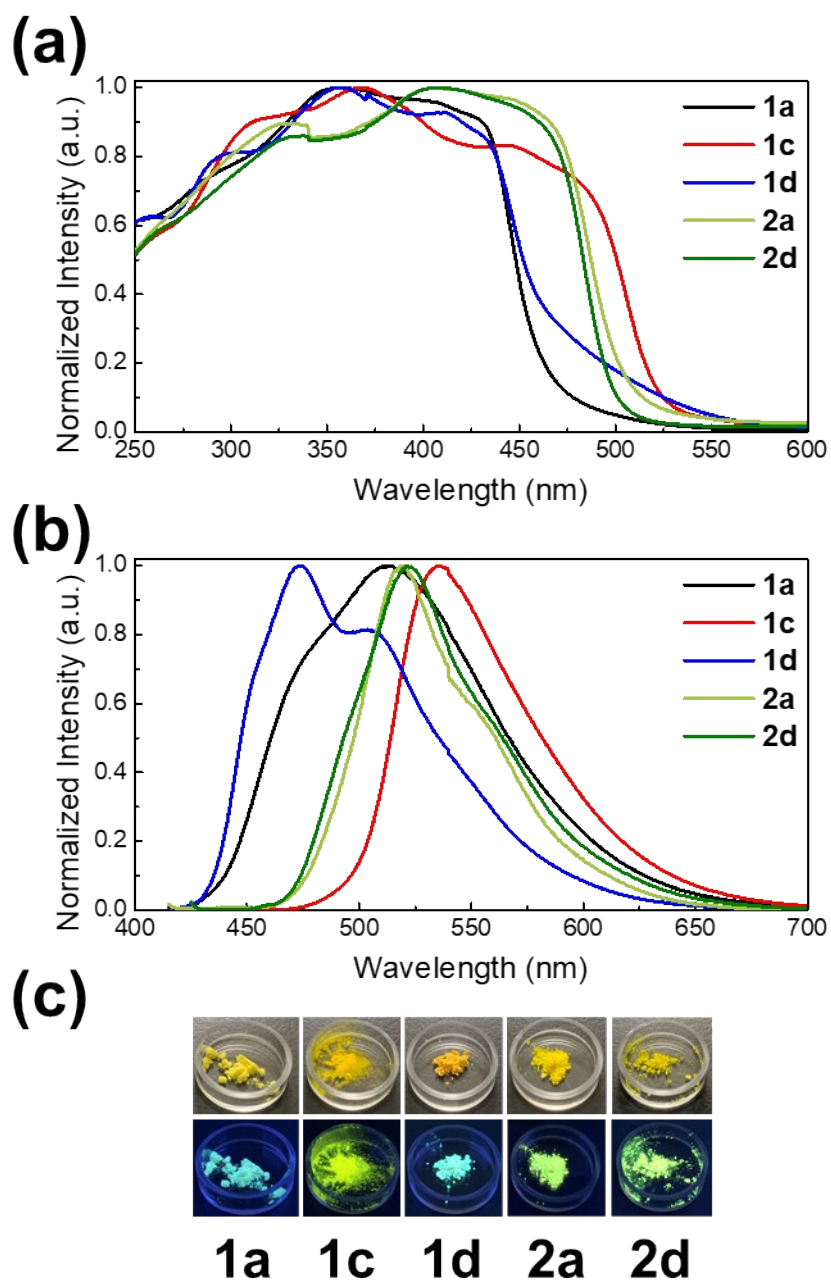

**Figure S26-1.** Normalized (a) UV-vis diffuse reflectance spectra, (b) emission spectra and (c) photographs under daylight (upper row) and 365 nm UV light irradiation of **1a**, **1c**, **1d**, **2a**, and **2d** in the solid powders.

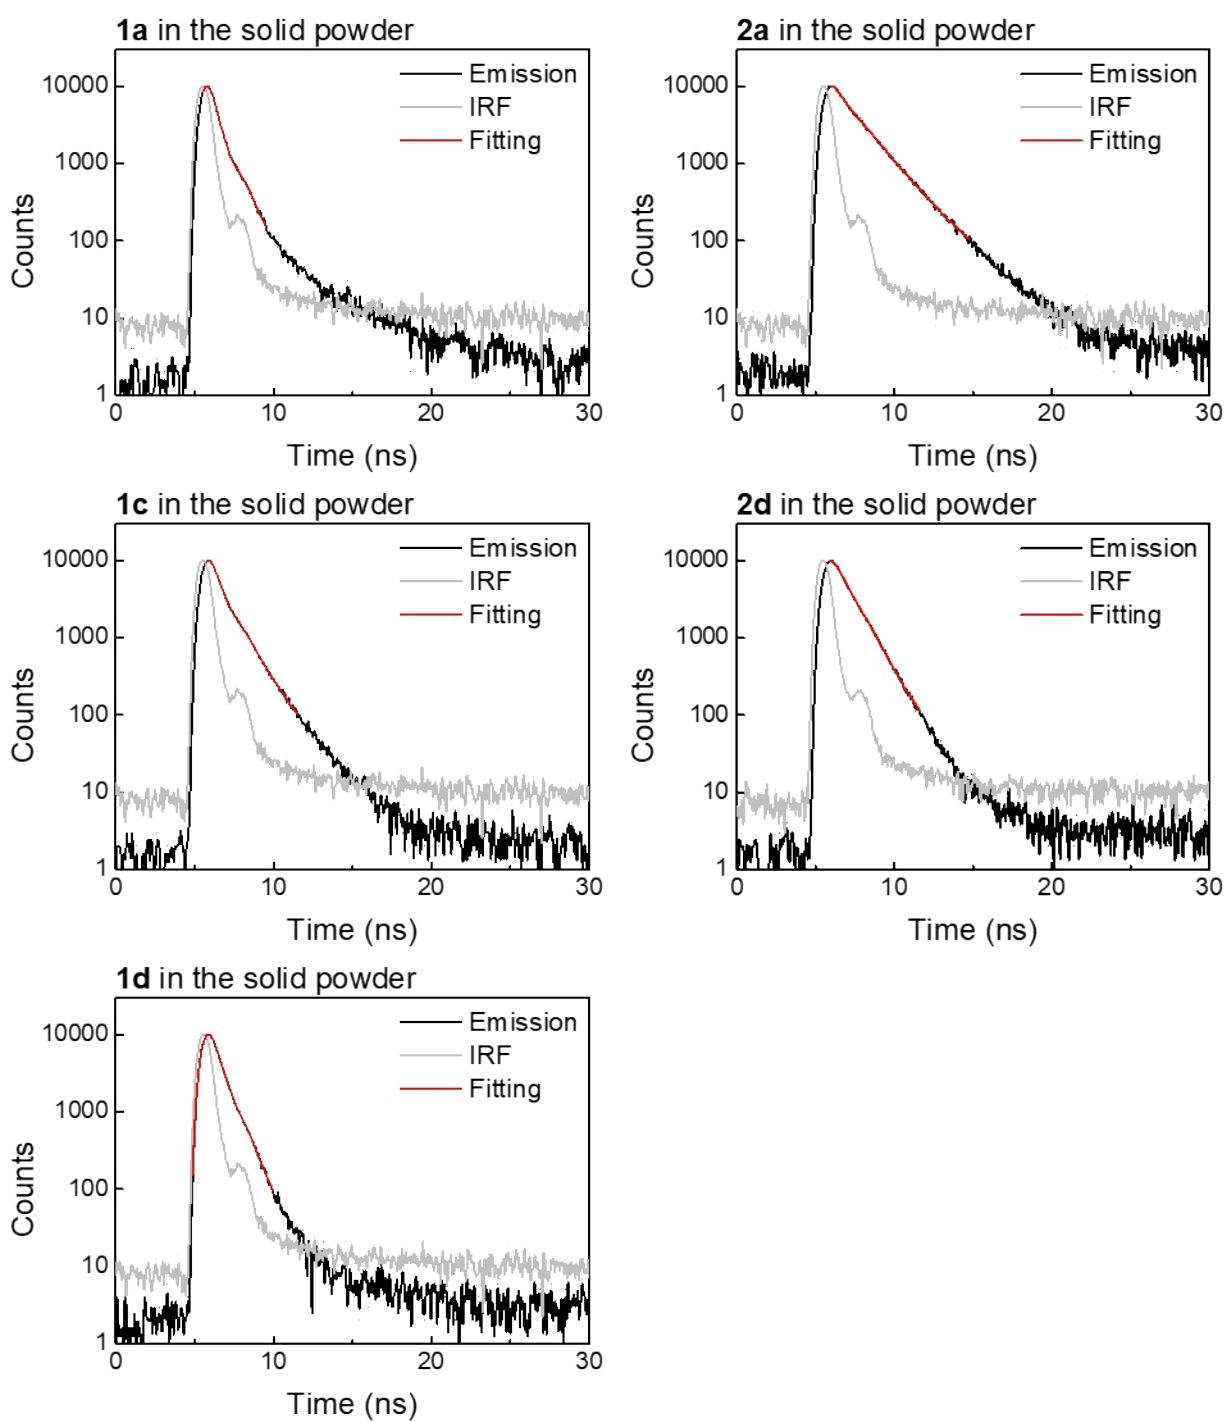

**Figure S26-2.** Emission decay curves (black line), fits (red line), and instrument response function (IRF) (gray line) of **1a**, **1c**, **1d**, **2a**, and **2d** in the solid powders. Excited at 365 nm and emission wavelength at  $\lambda_{em}^{max}$ .

**Table S8.** Summary of lifetime analyses for **1a**, **1c**, **1d**, **2a**, and **2d** in the solid powders. Emission lifetimes ( $\tau$ ), pre-exponential factor (A) and intensity average lifetime ( $\tau_{av}$ ).

| <b>Compd.</b> | $\lambda_{ex} / \text{nm}^{[a]}$ | $\lambda_{em} / \text{nm}^{[b]}$ | <b>CHI</b> | $\tau_{av} / \text{ns}$ | $\tau_1 / \text{ns}$ | $\tau_2 / \text{ns}$ | <b>A<sub>1</sub></b> | <b>A<sub>2</sub></b> |
|---------------|----------------------------------|----------------------------------|------------|-------------------------|----------------------|----------------------|----------------------|----------------------|
| <b>1a</b>     | 365                              | 513                              | 1.00       | 0.50                    | 0.25                 | 0.91                 | 1773.52              | 307.57               |
| <b>1c</b>     | 365                              | 535                              | 1.02       | 0.84                    | 0.36                 | 1.21                 | 1094.28              | 418.75               |
| <b>1d</b>     | 365                              | 474                              | 1.02       | 0.57                    | 0.22                 | 0.70                 | 988.43               | 813.22               |
| <b>2a</b>     | 365                              | 519                              | 1.14       | 1.56                    | 0.51                 | 1.75                 | 404.78               | 637.74               |
| <b>2d</b>     | 365                              | 521                              | 1.03       | 1.04                    | 1.04                 | —                    | 1038.79              | —                    |

[a] Excitation wavelength. [b] Emission wavelength.

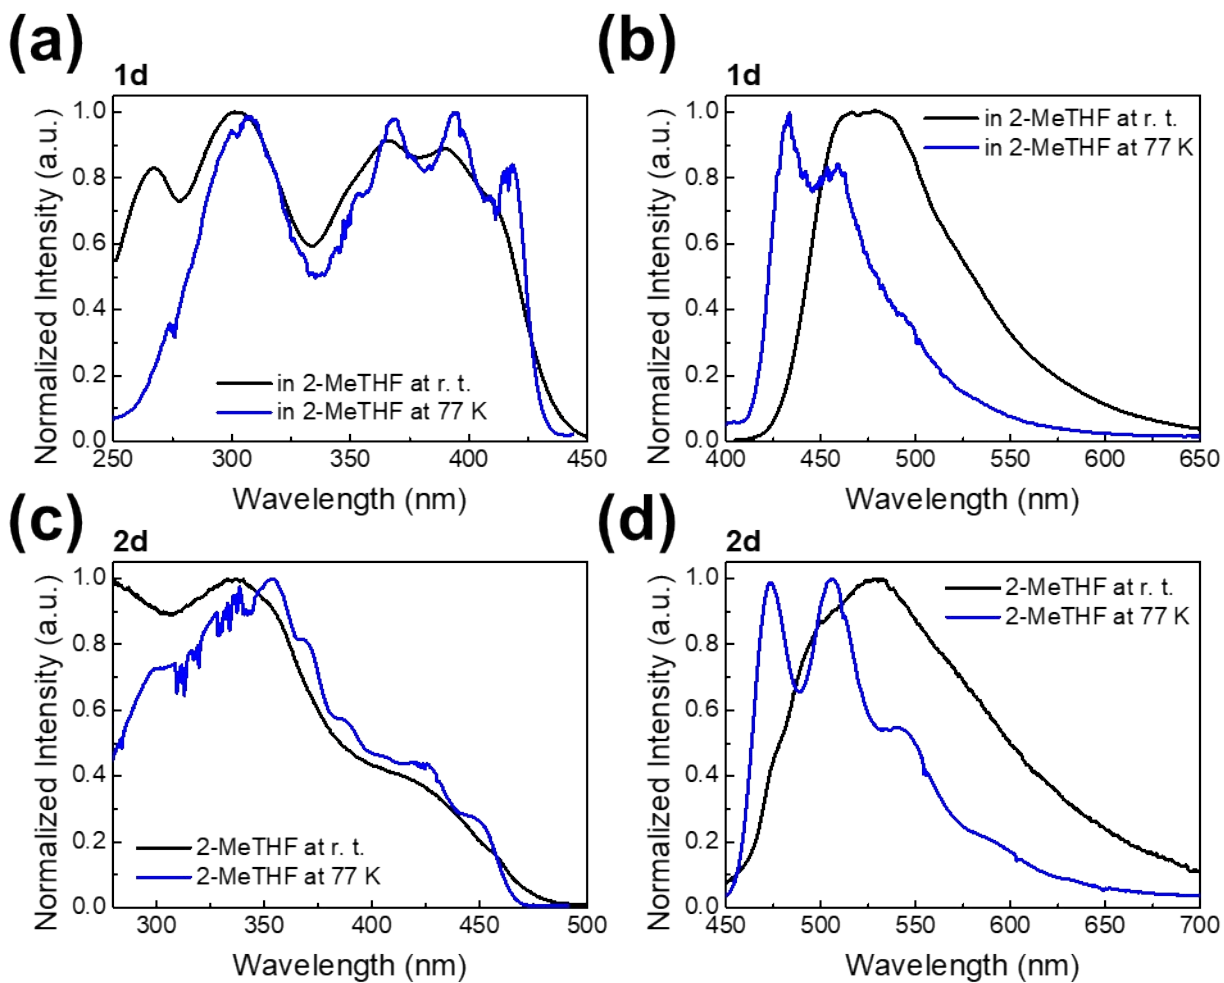

**Figure S27-1.** Normalized (a, c) excitation spectra and (b, d) emission spectra of **1d** and **2d** in 2-MeTHF ( $c = 10^{-6}$  M) at room temperature (r.t.) and 77 K.

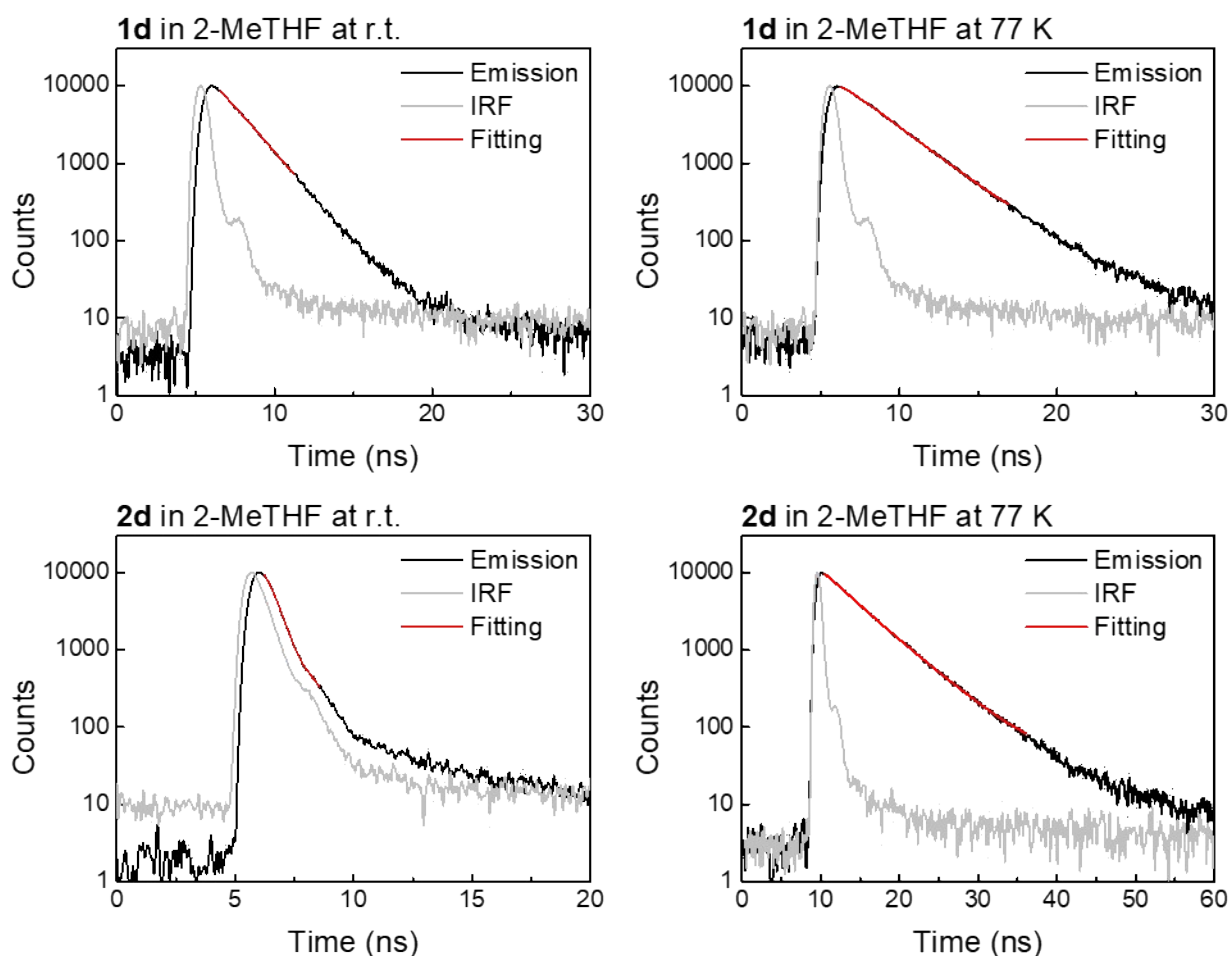

**Figure S27-2.** Emission decay curves (black line), fits (red line), and instrument response function (IRF) (gray line) of **1d** and **2d** in 2-MeTHF at room temperature (r.t.) and 77 K.

**Table S9.** Summary of lifetime analyses for **1d** and **2d** in 2-MeTHF at room temperature (r.t.) and 77 K. Emission lifetimes ( $\tau$ ), pre-exponential factor ( $A$ ) and intensity average lifetime ( $\tau_{av}$ ).

| Compd.    | Solvent         | $\lambda_{ex} / \text{nm}^{[a]}$ | $\lambda_{em} / \text{nm}^{[b]}$ | CHI  | $\tau_{av} / \text{ns}$ | $\tau_1 / \text{ns}$ | $\tau_2 / \text{ns}$ | $A_1$   | $A_2$   |
|-----------|-----------------|----------------------------------|----------------------------------|------|-------------------------|----------------------|----------------------|---------|---------|
| <b>1d</b> | 2-MeTHF at r.t. | 365                              | 473                              | 1.16 | 1.74                    | 1.74                 | —                    | 959.67  | —       |
|           | 2-MeTHF at 77 K | 365                              | 459                              | 1.15 | 2.77                    | 2.77                 | —                    | 746.96  | —       |
| <b>2d</b> | 2-MeTHF at r.t. | 340                              | 530                              | 1.03 | 0.28                    | 0.28                 | —                    | 2563.06 | —       |
|           | 2-MeTHF at 77 K | 365                              | 474                              | 1.03 | 4.71                    | 2.16                 | 4.96                 | 241.61  | 1075.68 |

[a] Excitation wavelength. [b] Emission wavelength.

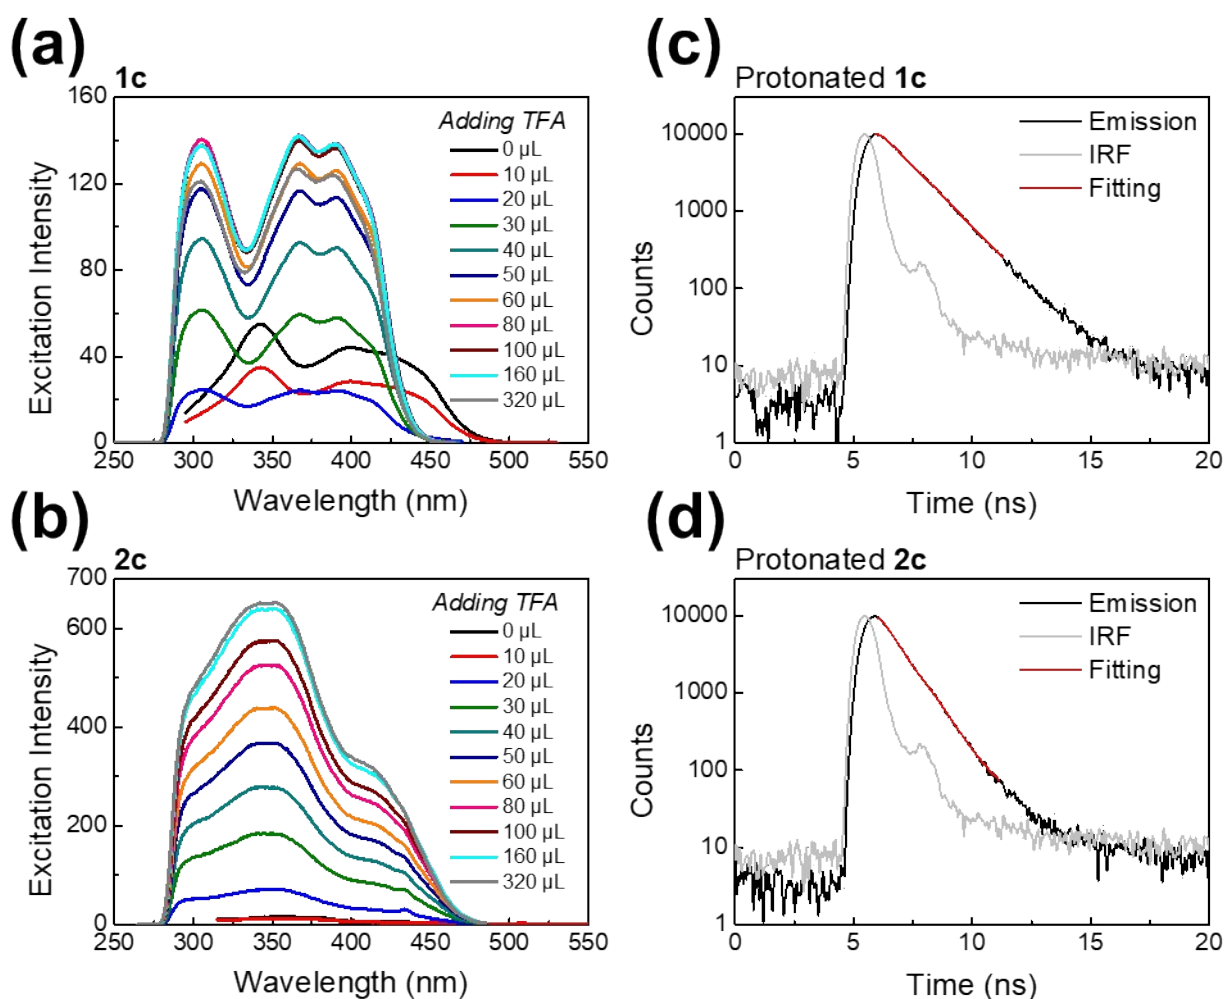

**Figure S28.** (a, b) Excitation spectra of **1c** and **2c** in toluene (3 mL,  $10^{-6}$  M) upon protonation by adding various amounts of TFA, emission wavelength at  $\lambda_{em}^{max}$  for **1c** and 500 nm for **2c**. (c, d) Emission decay curves (black line), fits (red line), and instrument response function (IRF) (gray line) of protonated **1c** and **2c** in toluene. Excited at 365 nm and emission wavelength at  $\lambda_{em}^{max}$ .

**Table S10.** Summary of lifetime analyses for protonated **1c** and **2c** in toluene upon protonation. Emission lifetimes ( $\tau$ ), pre-exponential factor ( $A$ ) and intensity average lifetime ( $\tau_{av}$ ).

| Compd.               | $\lambda_{ex} / nm^{[a]}$ | $\lambda_{em} / nm^{[b]}$ | CHI  | $\tau_{av} / ns$ | $\tau_1 / ns$ | $\tau_2 / ns$ | $A_1$   | $A_2$ |
|----------------------|---------------------------|---------------------------|------|------------------|---------------|---------------|---------|-------|
| protonated <b>1c</b> | 365                       | 457                       | 1.10 | 1.25             | 1.25          | —             | 967.24  | —     |
| protonated <b>2c</b> | 365                       | 515                       | 1.09 | 0.83             | 0.83          | —             | 1123.97 | —     |

[a] Excitation wavelength. [b] Emission wavelength.

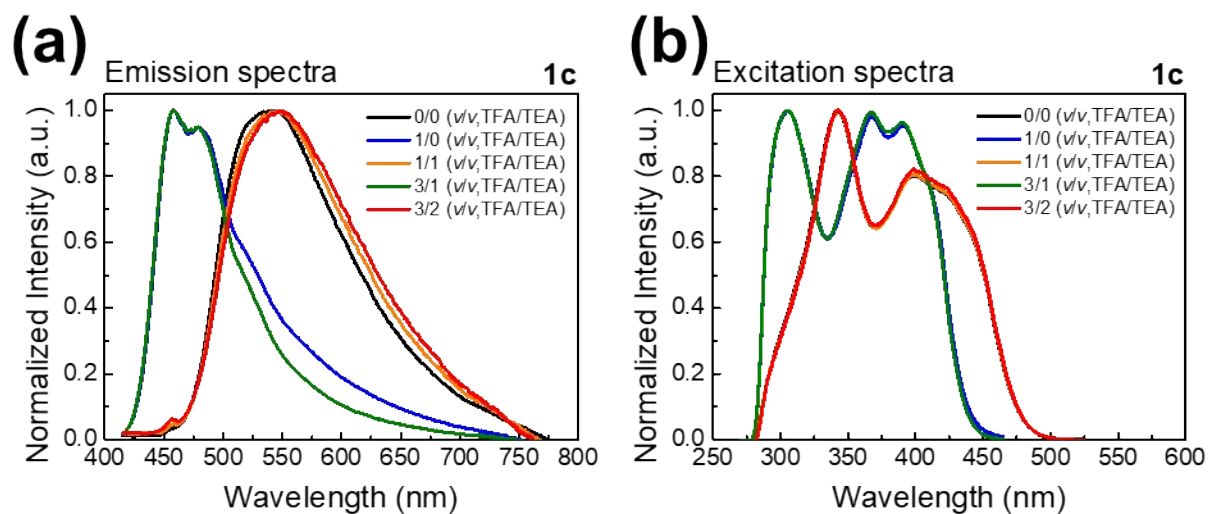

**Figure S29.** Normalized (a) emission spectra (excited at 400 nm) and (b) excitation spectra (emission wavelength at  $\lambda_{\text{em}}^{\text{max}}$ ) of **1c** in toluene (3 mL,  $c = 10^{-6}$  M) upon protonation by TFA and deprotonation by TEA. The added 1/1 (v/v) of TFA/TEA denoted as 20  $\mu\text{L}$ /20  $\mu\text{L}$ .



## Optical resolution by Recycling Preparative Chiral HPLC

Optical resolution was performed using LaboACE LC-5060 instrument with UV detector (UV-4ch 400 LA) by Japan Analytical Industry Co., Ltd. equipped with a CHIRALPAK® ID (Particle Size:

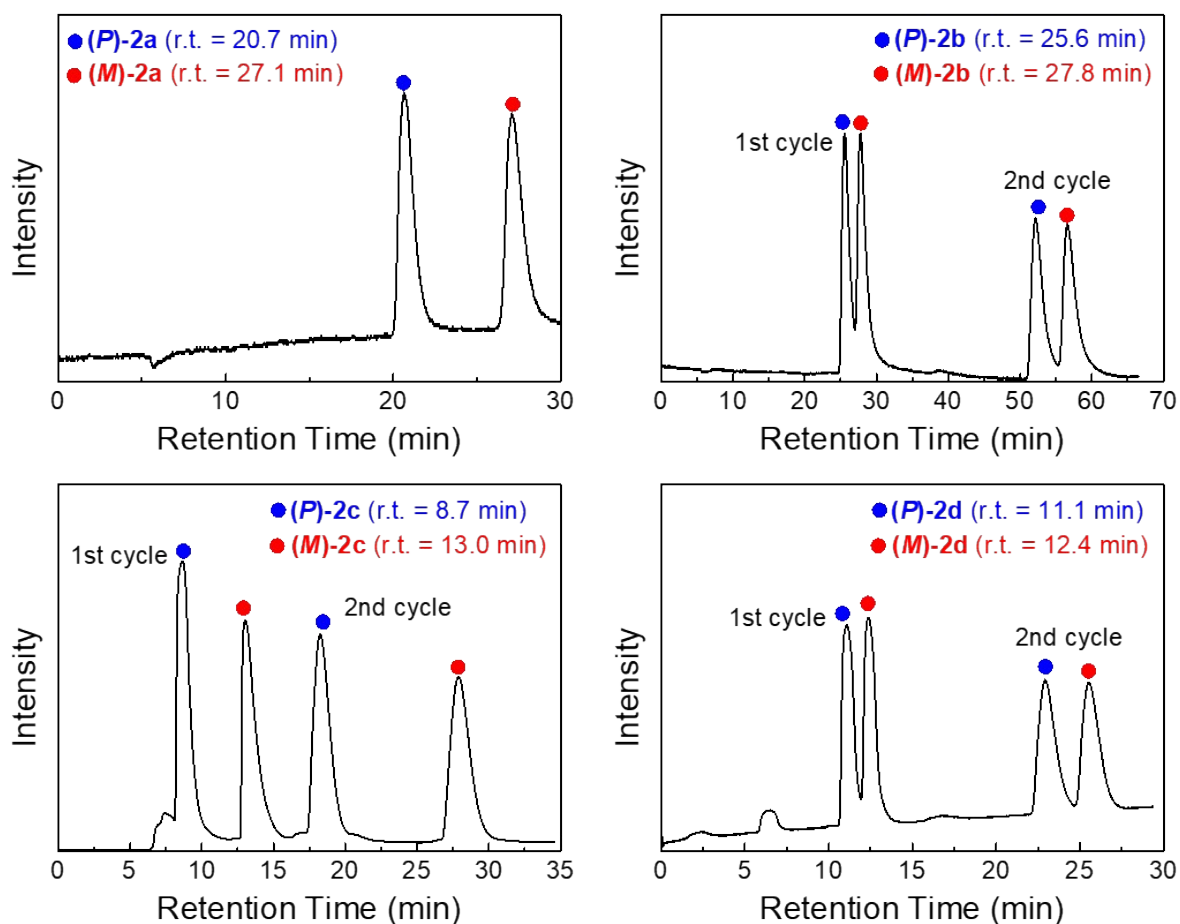

5 $\mu$ m; Dimensions: 20mm  $\varnothing$   $\times$  250mm L).

**Figure S30.** Chiral HPLC profile for the separation of enantiomers of **2a–2d**. Frac.1 (blue) = (*P*)-enantiomer, Frac. 2 (red) = (*P*)-enantiomer.

**Table S11.** Chiral HPLC conditions for the separation of enantiomers of **2a–2d**.

| Compd.    | Chiral column <sup>[a]</sup> | Eluent ( $v/v$ )                                 | Flow rate / mL min <sup>-1</sup> | $\lambda$ / nm of UV detection |
|-----------|------------------------------|--------------------------------------------------|----------------------------------|--------------------------------|
| <b>2a</b> | CHIRALPAK® ID                | ethyl acetate / hexane (3 / 7)                   | 10                               | 400                            |
| <b>2b</b> | CHIRALPAK® ID                | ethyl acetate / hexane (3 / 7)                   | 10                               | 400                            |
| <b>2c</b> | CHIRALPAK® ID                | CH <sub>2</sub> Cl <sub>2</sub> / hexane (9 / 1) | 10                               | 400                            |
| <b>2d</b> | CHIRALPAK® ID                | CH <sub>2</sub> Cl <sub>2</sub> / hexane (8 / 2) | 10                               | 400                            |

[a] For CHIRALPAK® ID: Particle Size: 5 $\mu$ m; Dimensions: 20mm  $\varnothing$   $\times$  250mm L

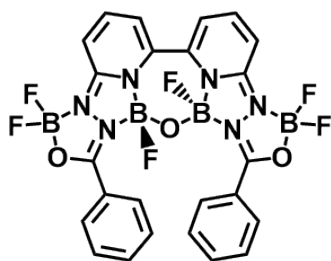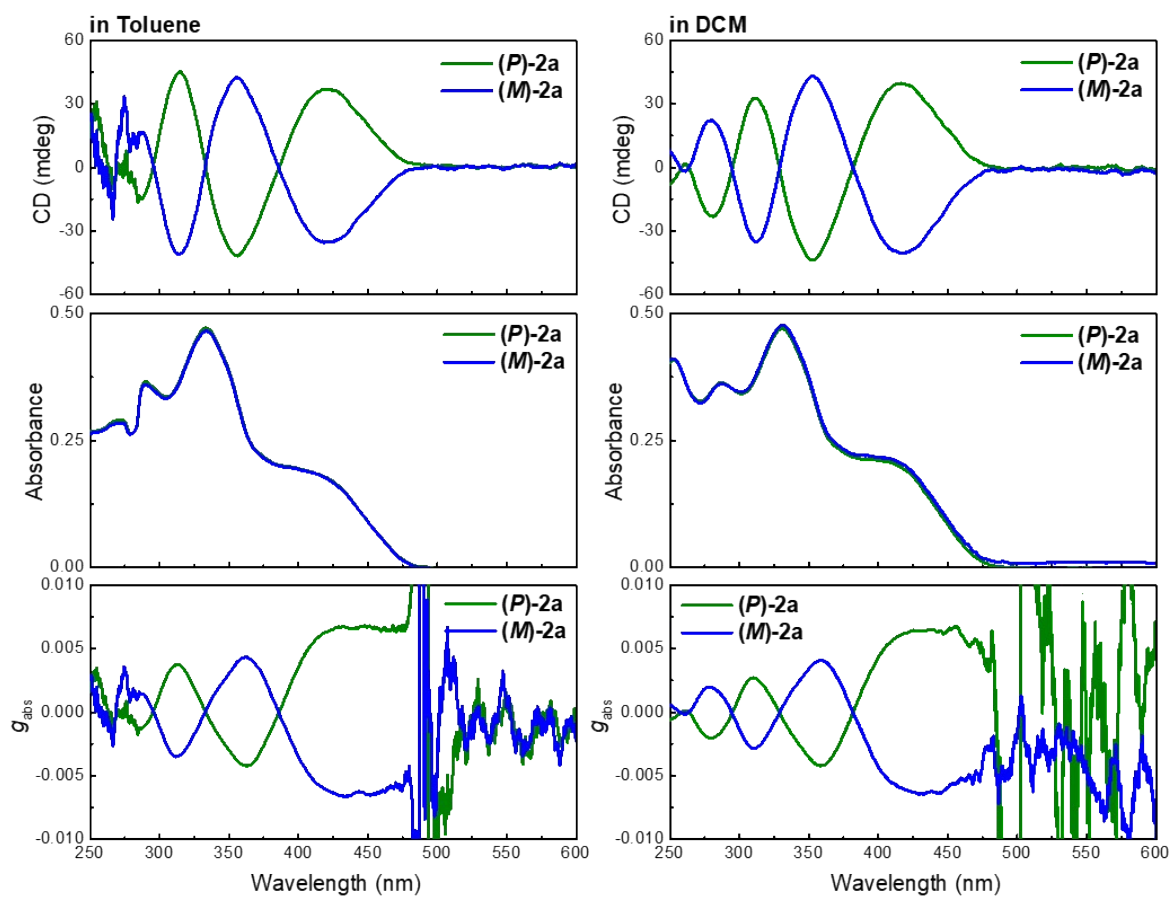

**Figure S31.** CD, absorption, and  $g_{\text{abs}}$  spectra of *(P)*-2a (green) and *(M)*-2a (blue) in toluene (left) and DCM (right) ( $c = 10^{-6}$  M).

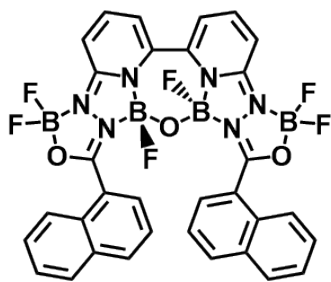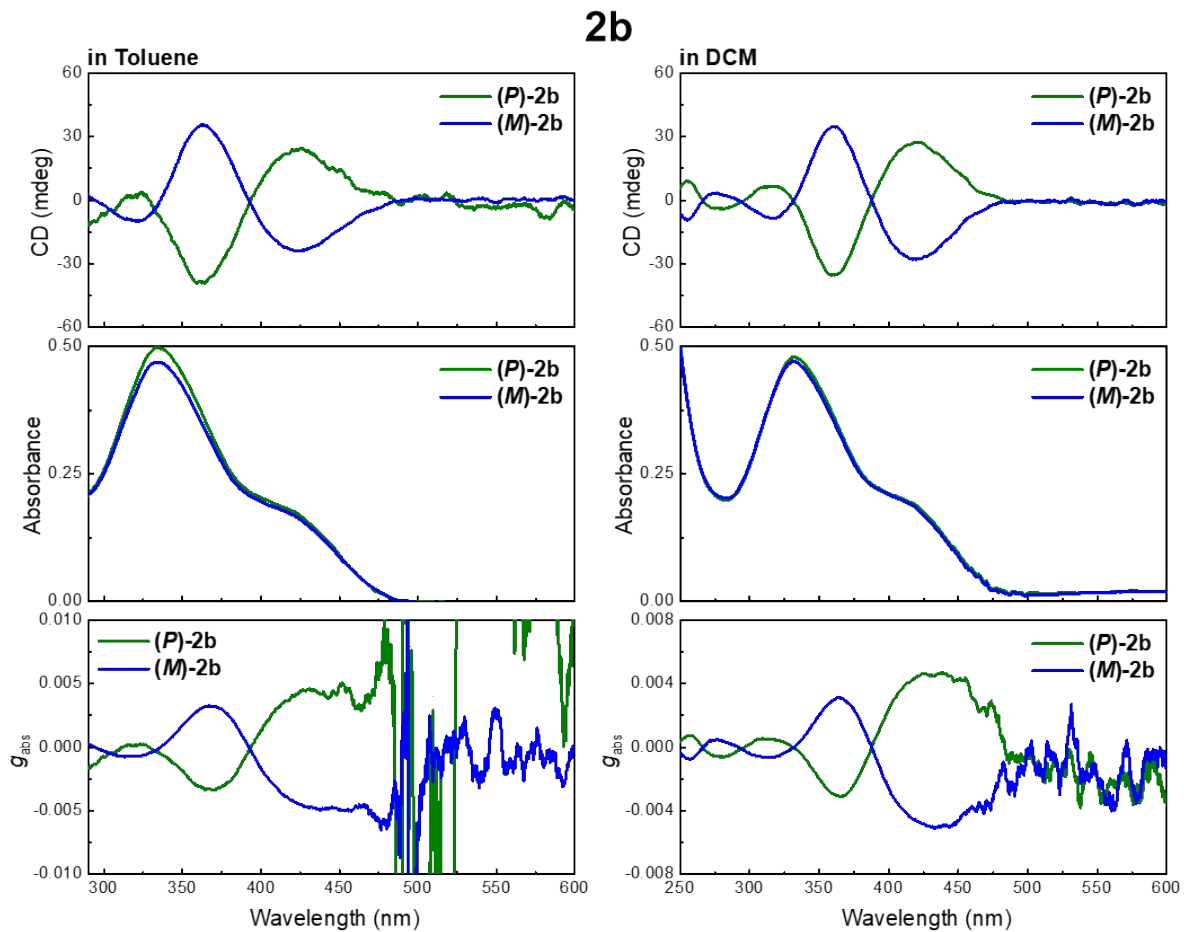

**Figure S32.** CD, absorption, and  $g_{\text{abs}}$  spectra of *(P)*-2b (green) and *(M)*-2b (blue) in toluene (left) and DCM (right) ( $c = 10^{-6}$  M).

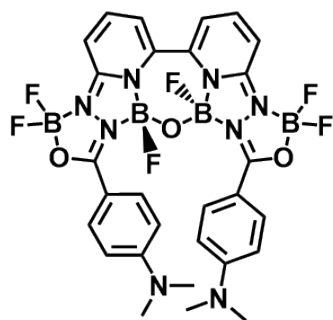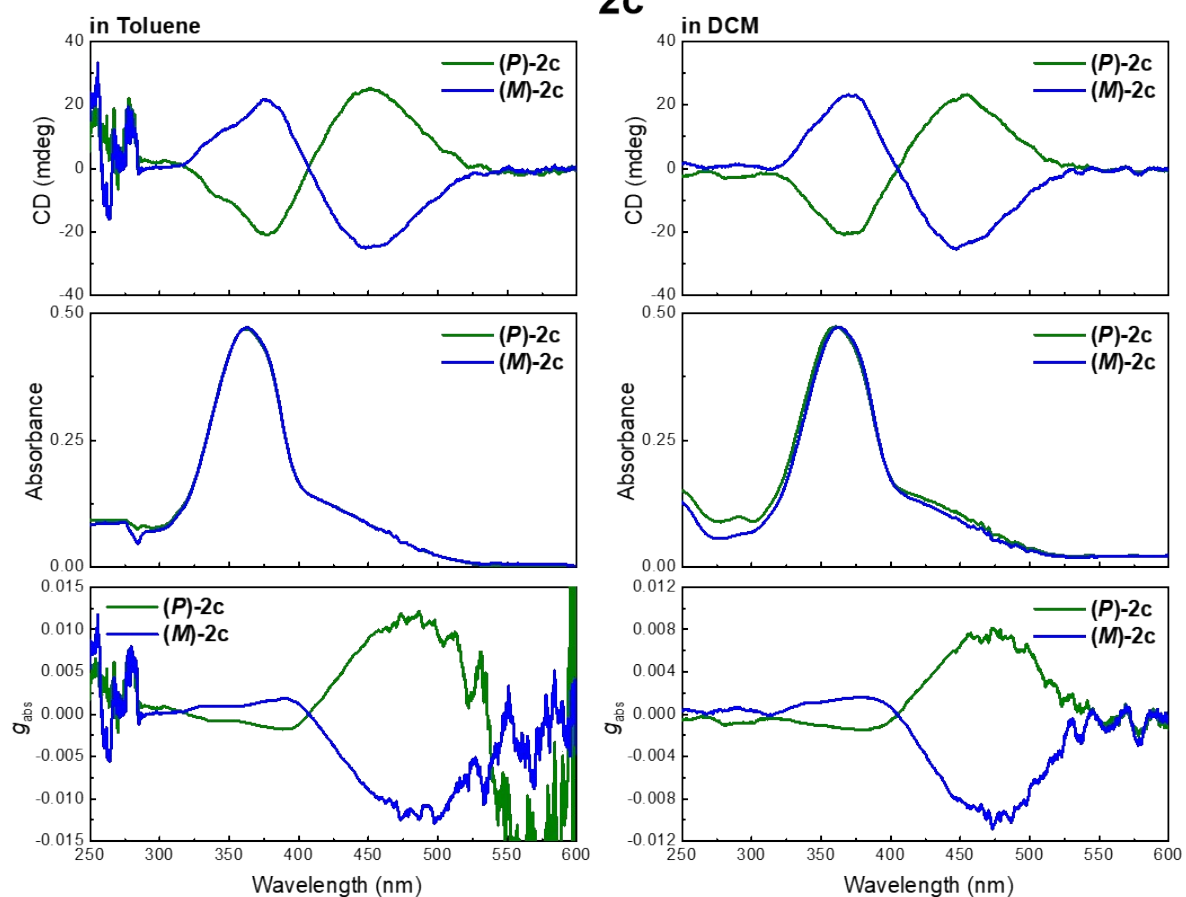

**Figure S33.** CD, absorption, and  $g_{\text{abs}}$  spectra of *(P)*-2c (green) and *(M)*-2c (blue) in toluene (left) and DCM (right) ( $c = 10^{-6}$  M).

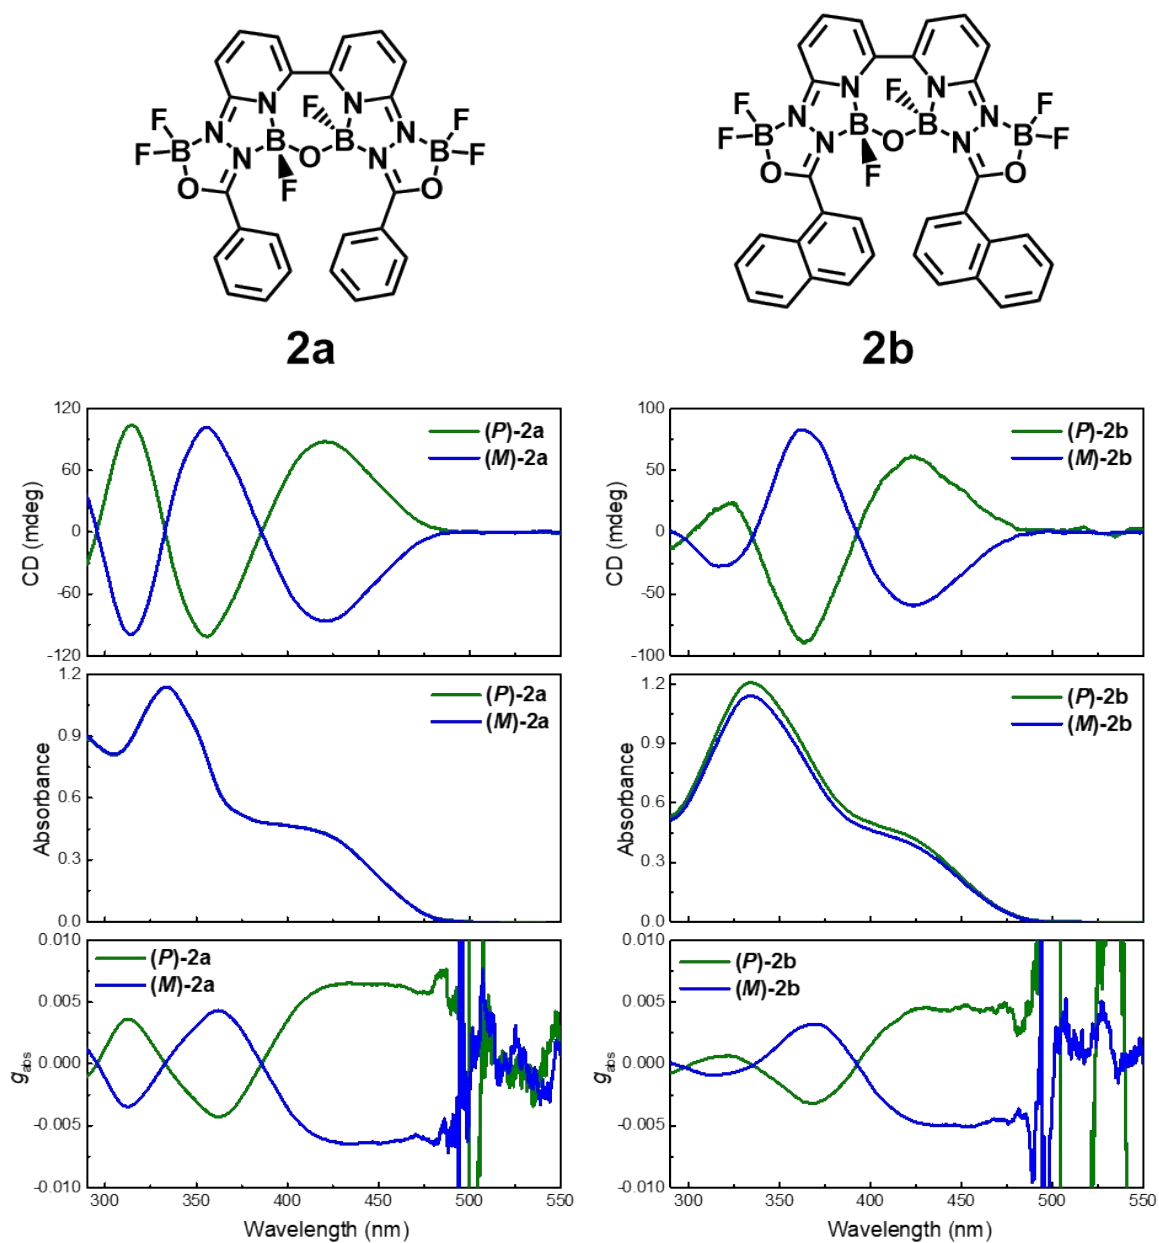

**Figure S34-1.** (Left) CD, absorption, and  $g_{\text{abs}}$  spectra of (*P*)-**2a** (green) and (*M*)-**2a** (blue) in toluene ( $c = 10^{-5}$  M). (Right) CD, absorption, and  $g_{\text{abs}}$  spectra of (*P*)-**2b** (green) and (*M*)-**2b** (blue) in toluene ( $c = 10^{-5}$  M).

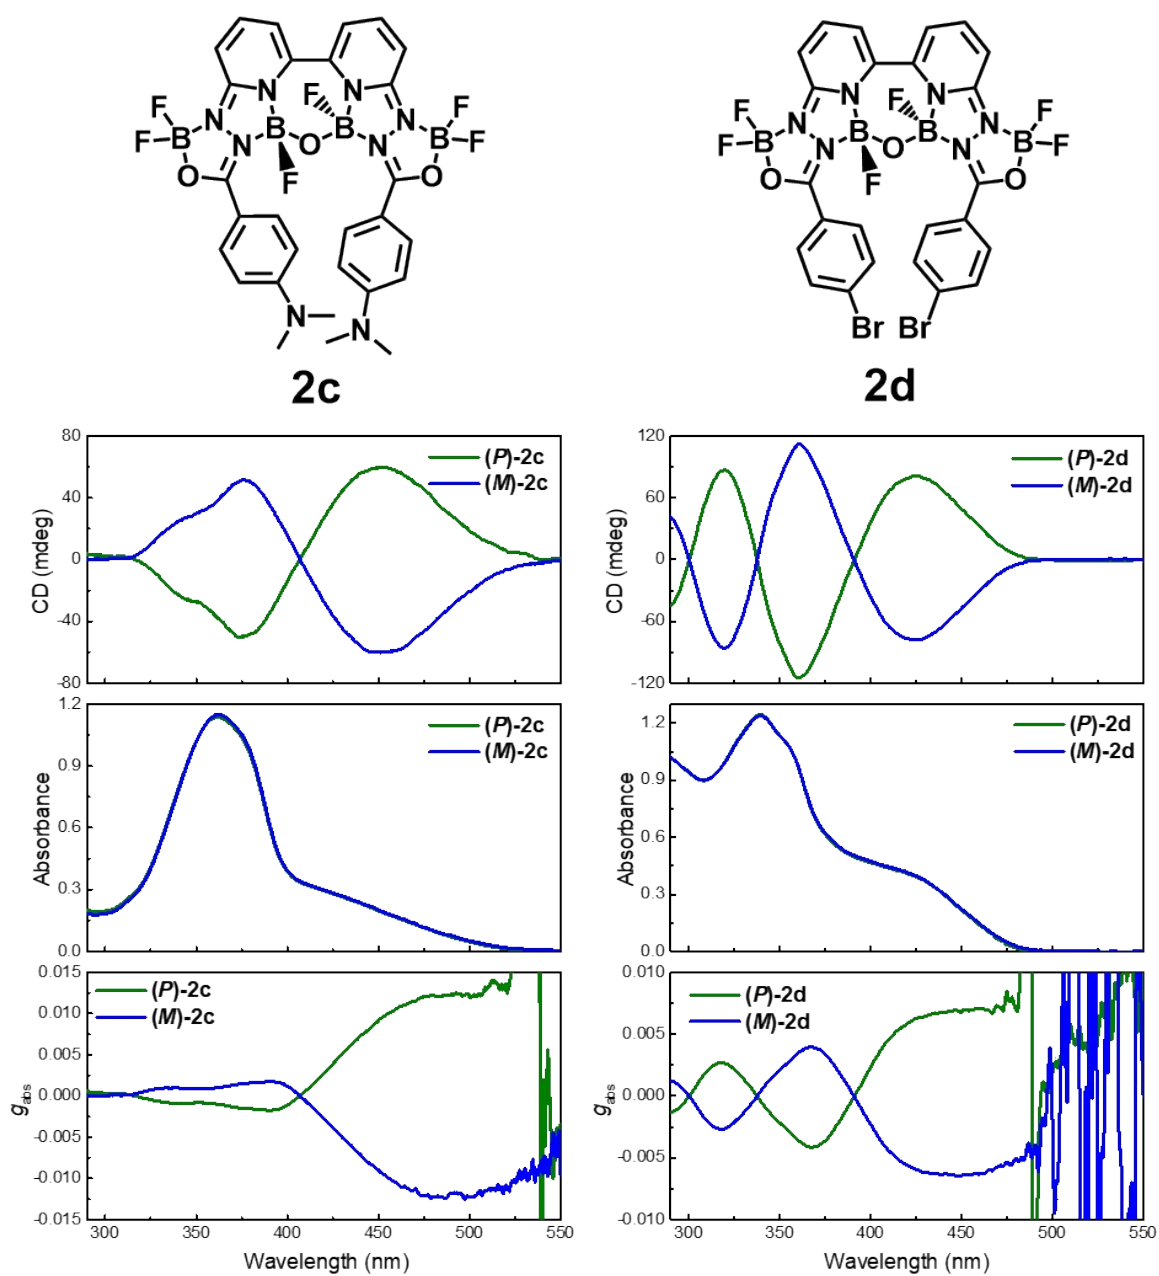

**Figure S34-2.** (Left) CD, absorption, and  $g_{\text{abs}}$  spectra of (*P*)-**2c** (green) and (*M*)-**2c** (blue) in toluene ( $c = 10^{-5}$  M). (Right) CD, absorption, and  $g_{\text{abs}}$  spectra of (*P*)-**2d** (green) and (*M*)-**2d** (blue) in toluene ( $c = 10^{-5}$  M).

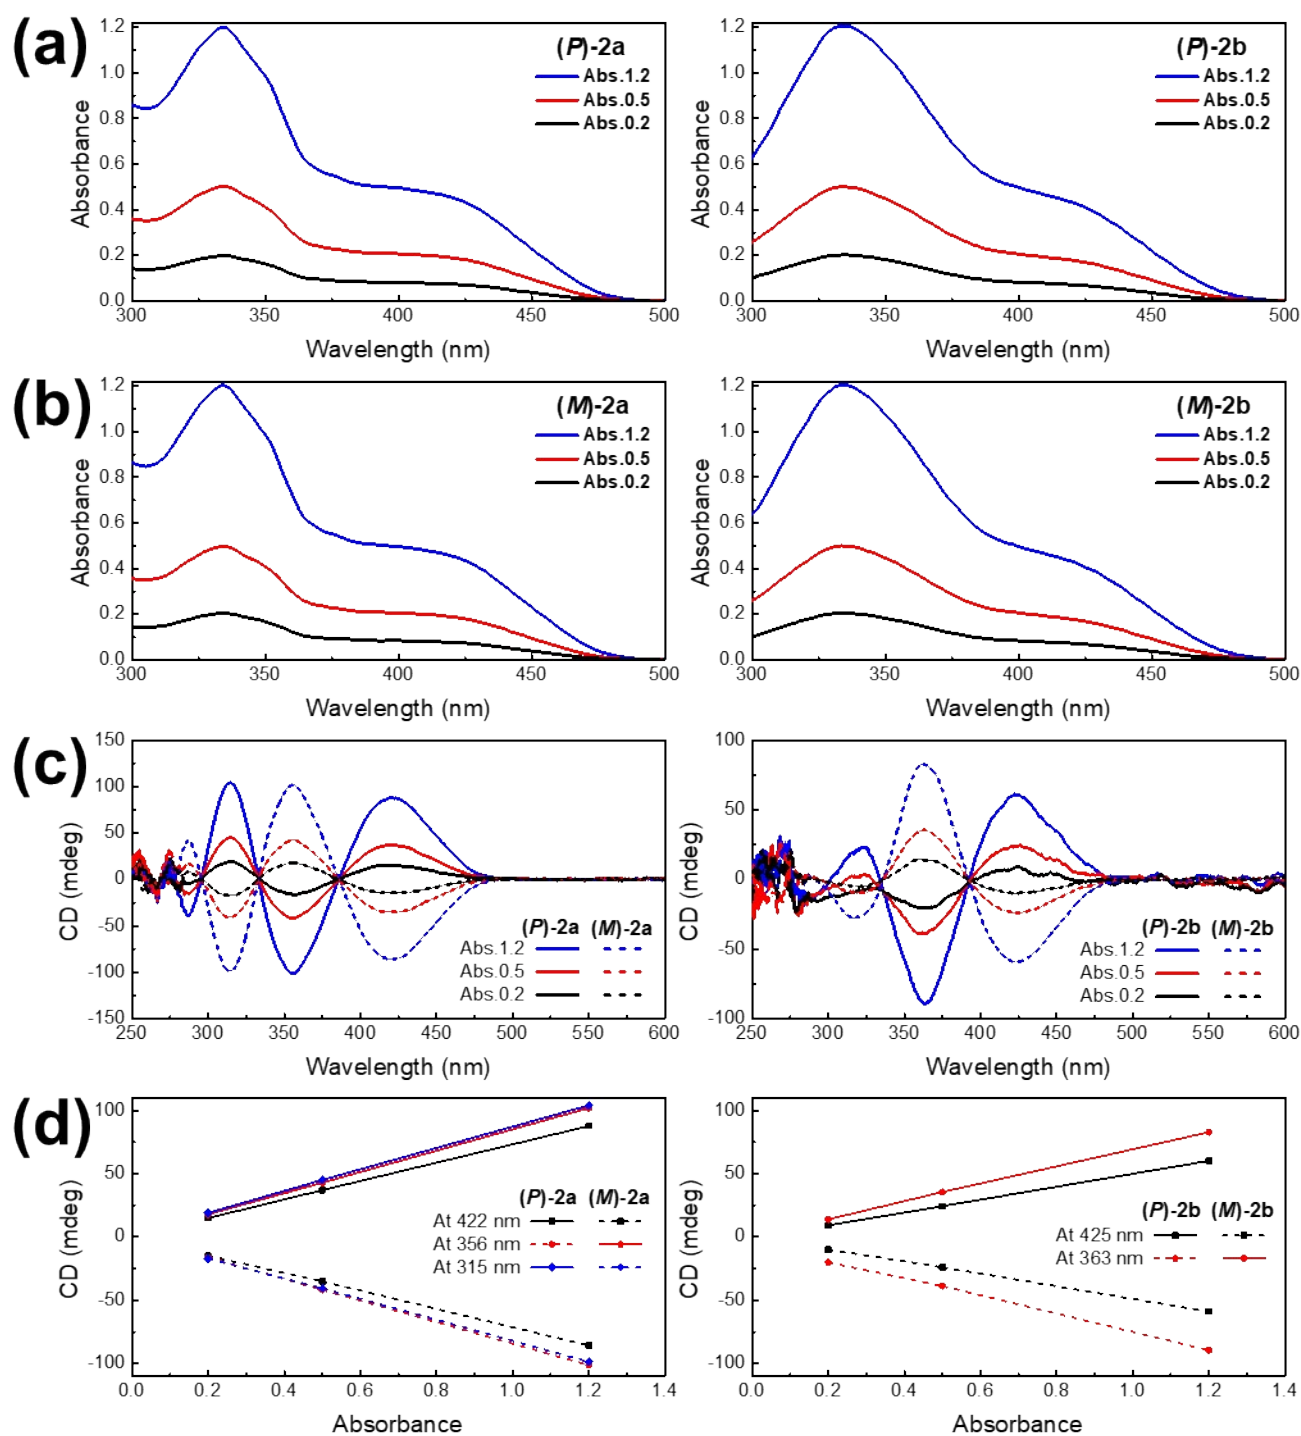

**Figure S35-1.** Concentration-dependent UV-vis absorption and CD spectra of (P)/(M)-2a and (P)/(M)-2b in toluene at 25 °C. (a, b) UV-vis absorption spectra at maximum absorbance of 0.2, 0.5, 1.2, and their (c) CD spectra. (d) A linear correlation between absorbance and ellipticity at different wavelengths in toluene. The optical path length of CD cell is 1 cm.

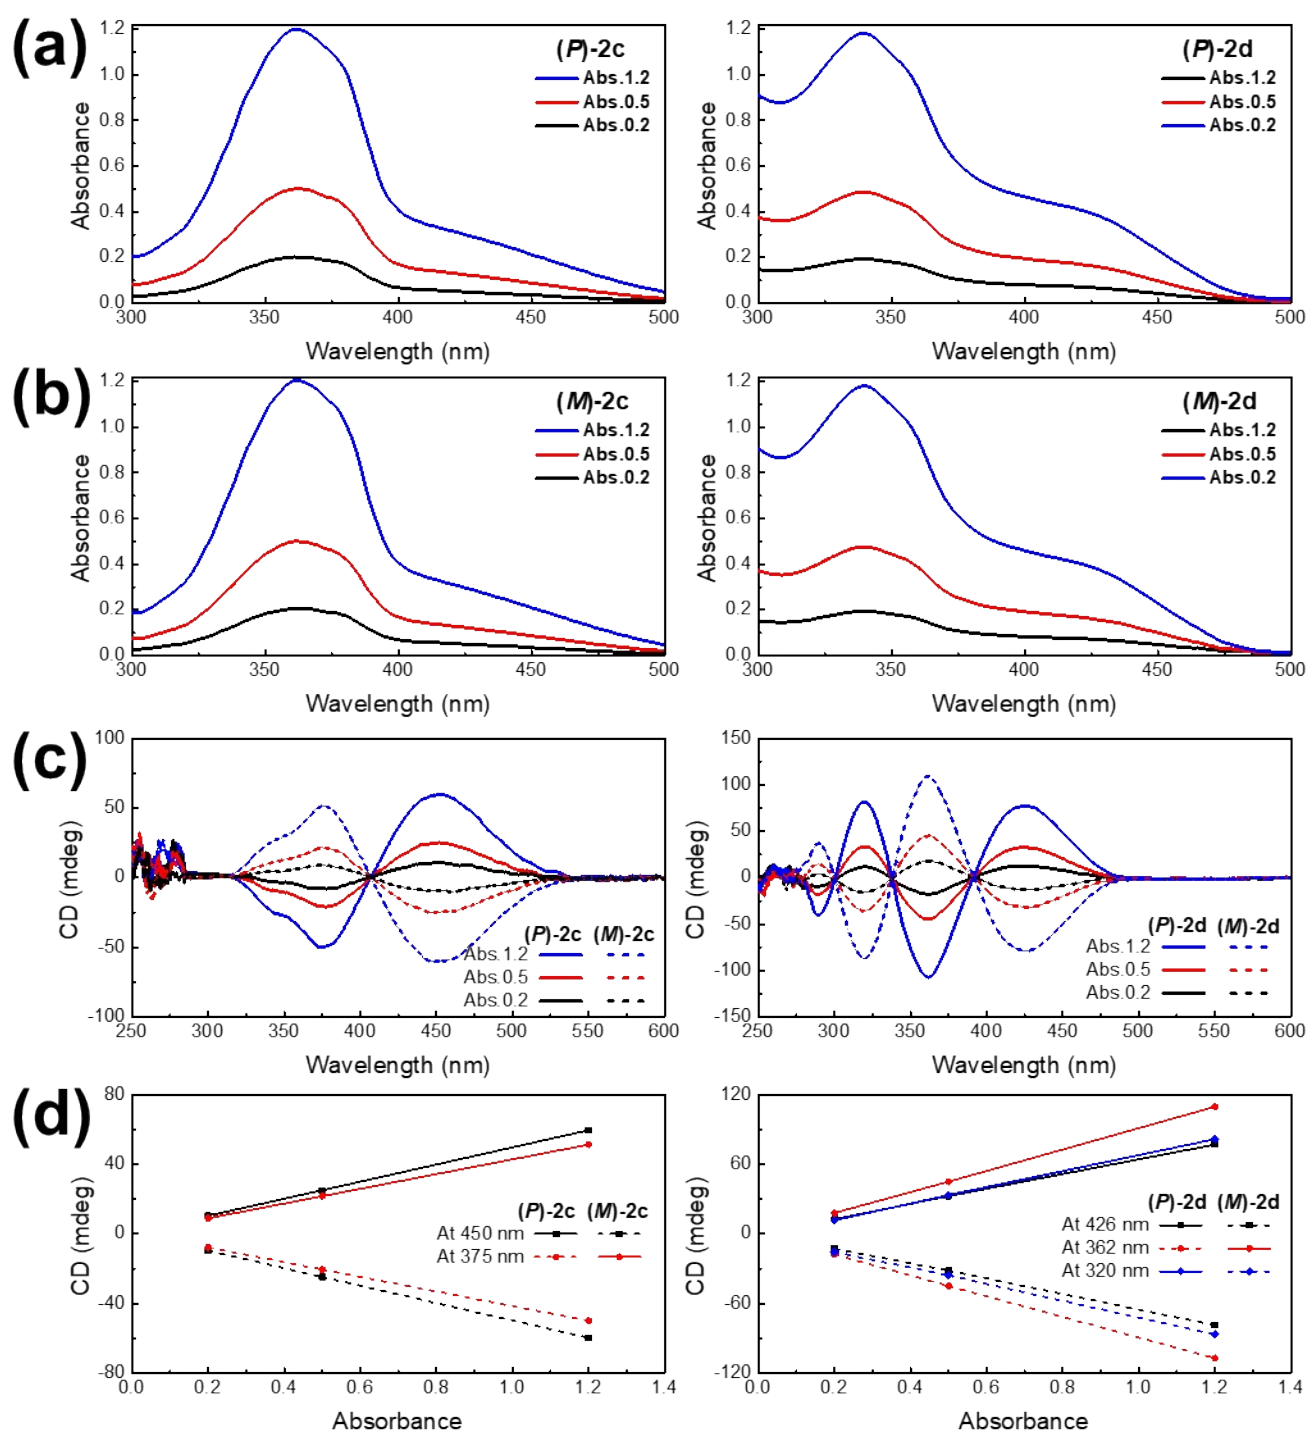

**Figure S35-2.** Concentration-dependent UV-vis absorption and CD spectra of *(P)*/*(M)*-2c and *(P)*/*(M)*-2d in toluene at 25 °C. (a, b) UV-vis absorption spectra at maximum absorbance of 0.2, 0.5, 1.2, and their (c) CD spectra. (d) A linear correlation between absorbance and ellipticity at different wavelengths in toluene. The optical path length of CD cell is 1 cm.



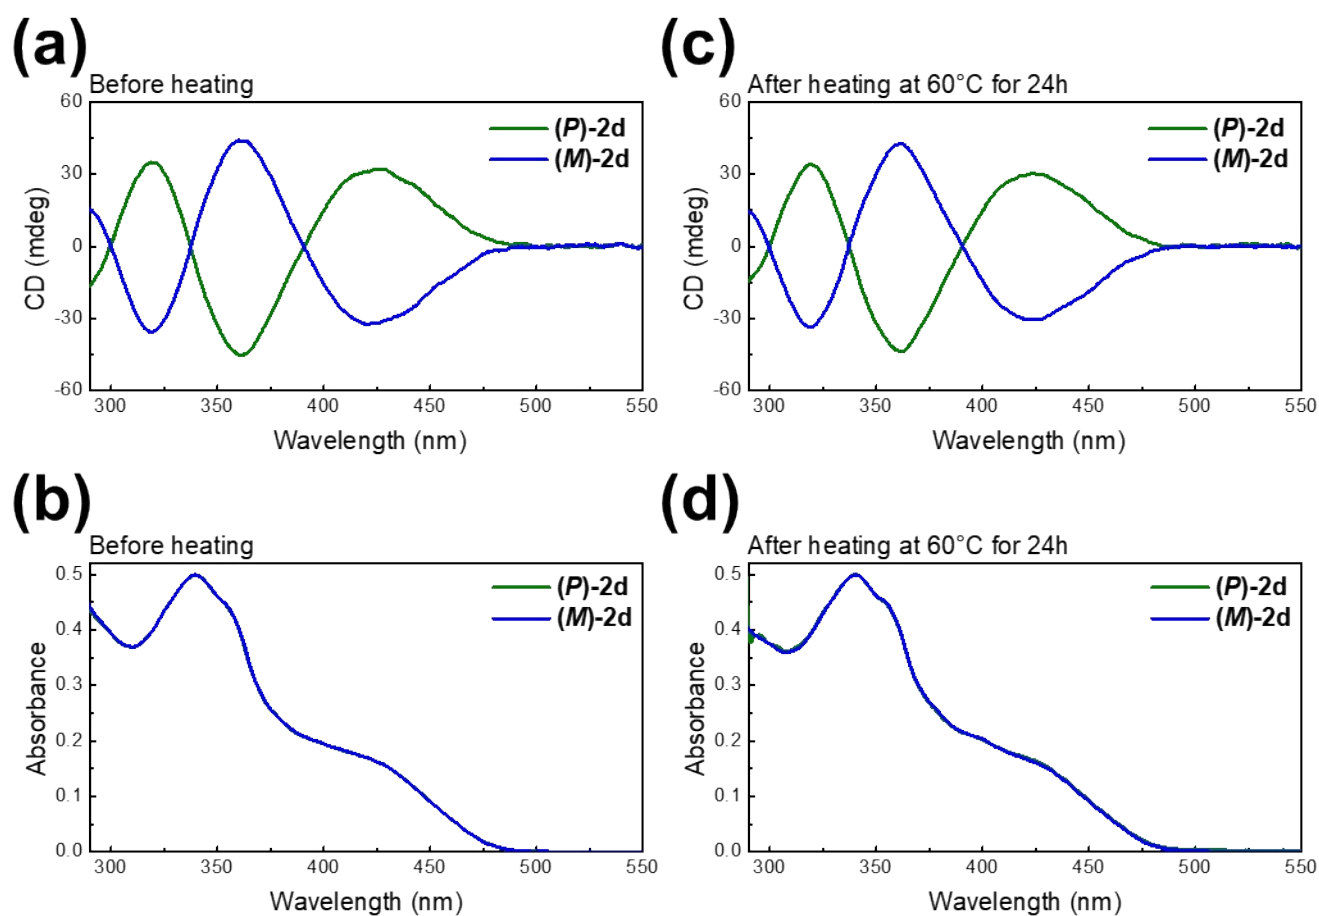

**Figure S36.** (a) CD and (b) UV-vis absorption spectra of (*P*)-2d and (*M*)-2d in toluene at 25 °C. (c) CD and (d) UV-vis absorption spectra of (*P*)-2d and (*M*)-2d after heating at 60 °C for 24 h in toluene.

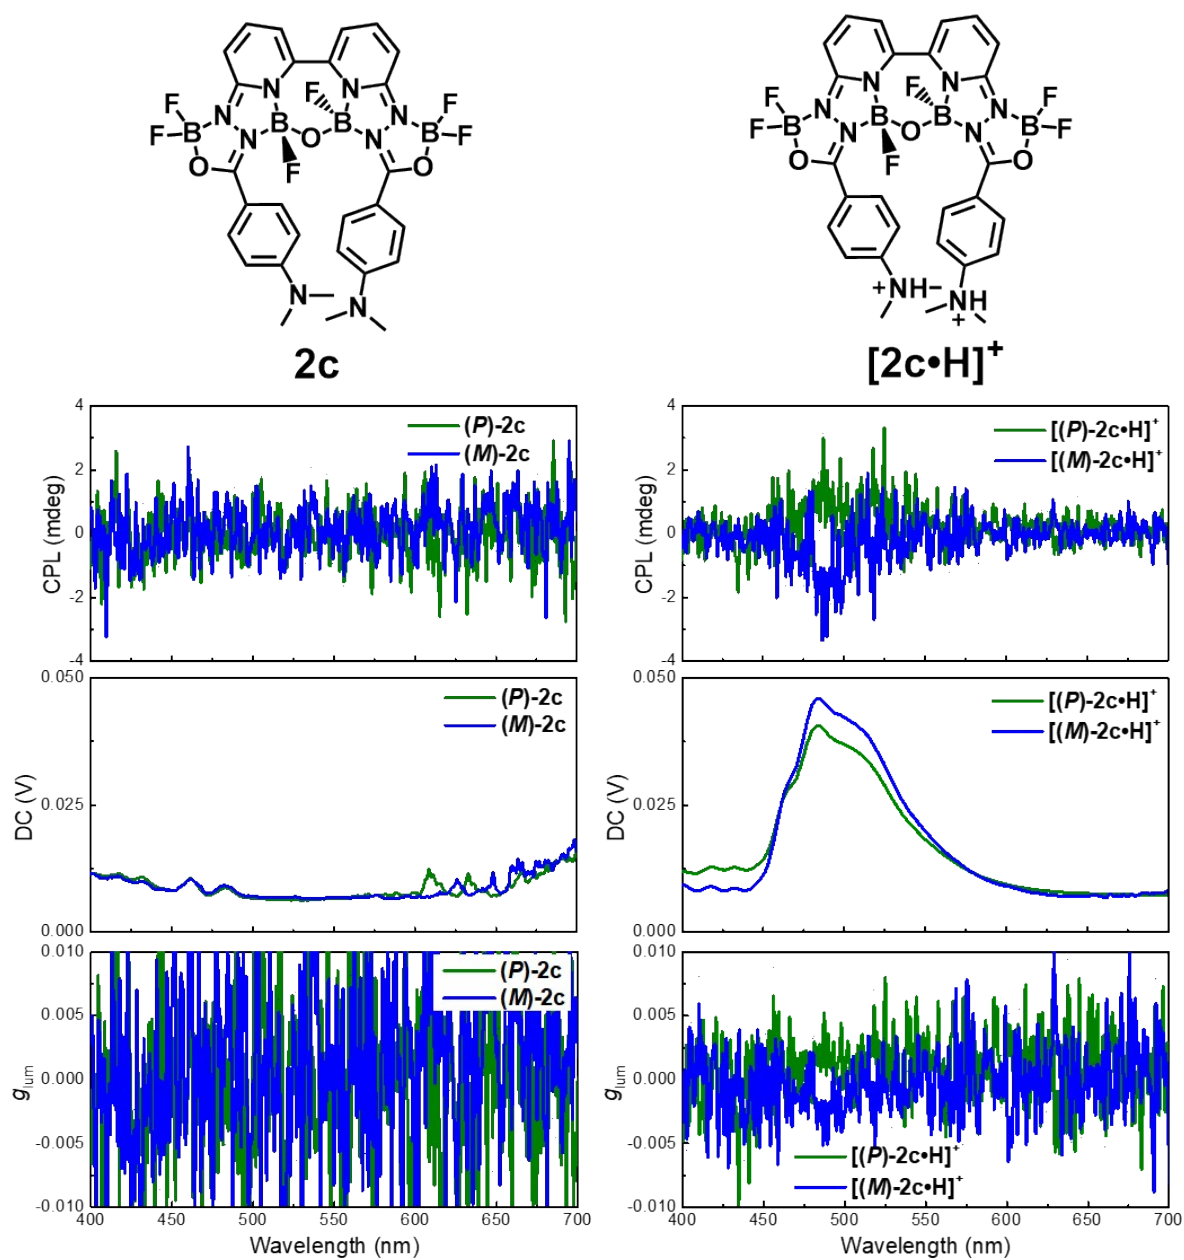

**Figure S37.** (Left) CPL, DC (nonpolarized fluorescence) and  $g_{lum}$  spectra of (*P*)-**2c** (green) and (*M*)-**2c** (blue) in toluene ( $c = 10^{-6}$  M). (Right) CPL, DC (nonpolarized fluorescence) and  $g_{lum}$  spectra of [(*P*)-**2c•H**]<sup>+</sup> (green) and [(*M*)-**2c•H**]<sup>+</sup> (blue) in toluene (3 mL,  $10^{-6}$  M) upon protonation by adding 100uL TFA. Excited at 330 nm.

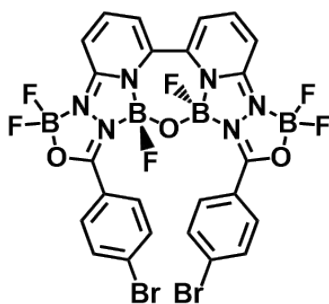

**2d**

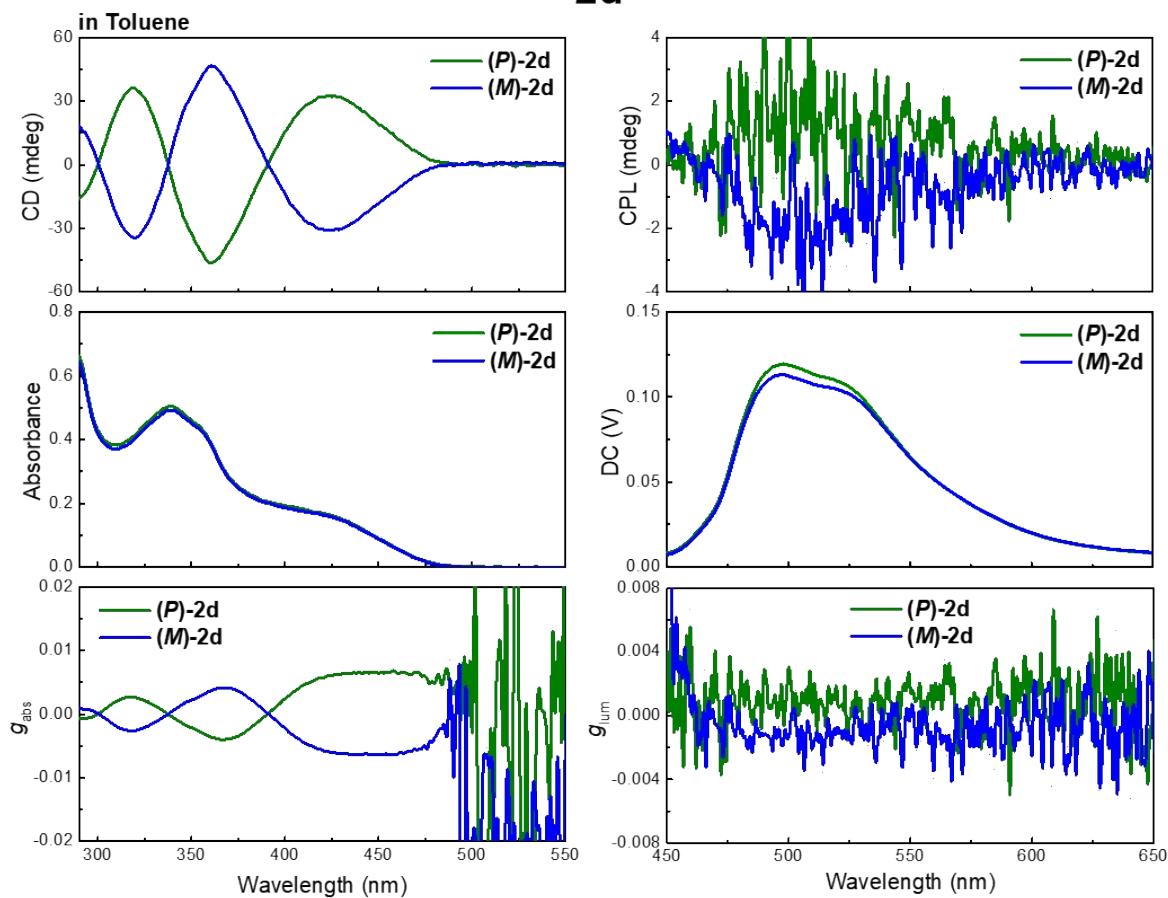

**Figure S38.** (Left) CD, absorption, and  $g_{\text{abs}}$  spectra of **(P)-2d** (green) and **(M)-2d** (blue) in toluene ( $c = 10^{-6}$  M). (Right) CPL, DC (nonpolarized fluorescence) and  $g_{\text{lum}}$  spectra of **(P)-2d** (green) and **(M)-2d** (blue) in toluene ( $c = 10^{-6}$  M). Excited at 330 nm.

## Preparation of 1b-doped polymer films

The **1b**-doped polymer films were prepared using poly (methyl methacrylate) (PMMA, SigmaAldrich, Mw ~120,000) as the inert matrix. 300  $\mu\text{L}$  of toluene solution of (*P*)/(*M*)-**1b** adjusted to a maximum absorbance of 1.2 ( $c = 4.15 \times 10^{-5}$  mol/L) was mixed with 300  $\mu\text{L}$  of toluene solution of PMMA (0.1 g/mL). A 100  $\mu\text{L}$  of the mixture was cast onto a quartz substrate (1 cm  $\times$  1 cm), air-dried, and vacuumed for 3 hours to obtain the hybrid PMMA films.

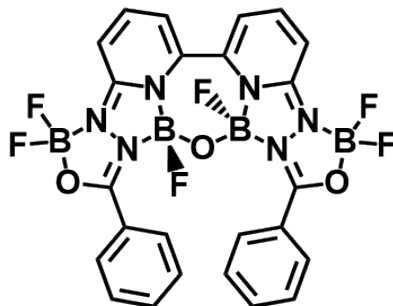

**2a**

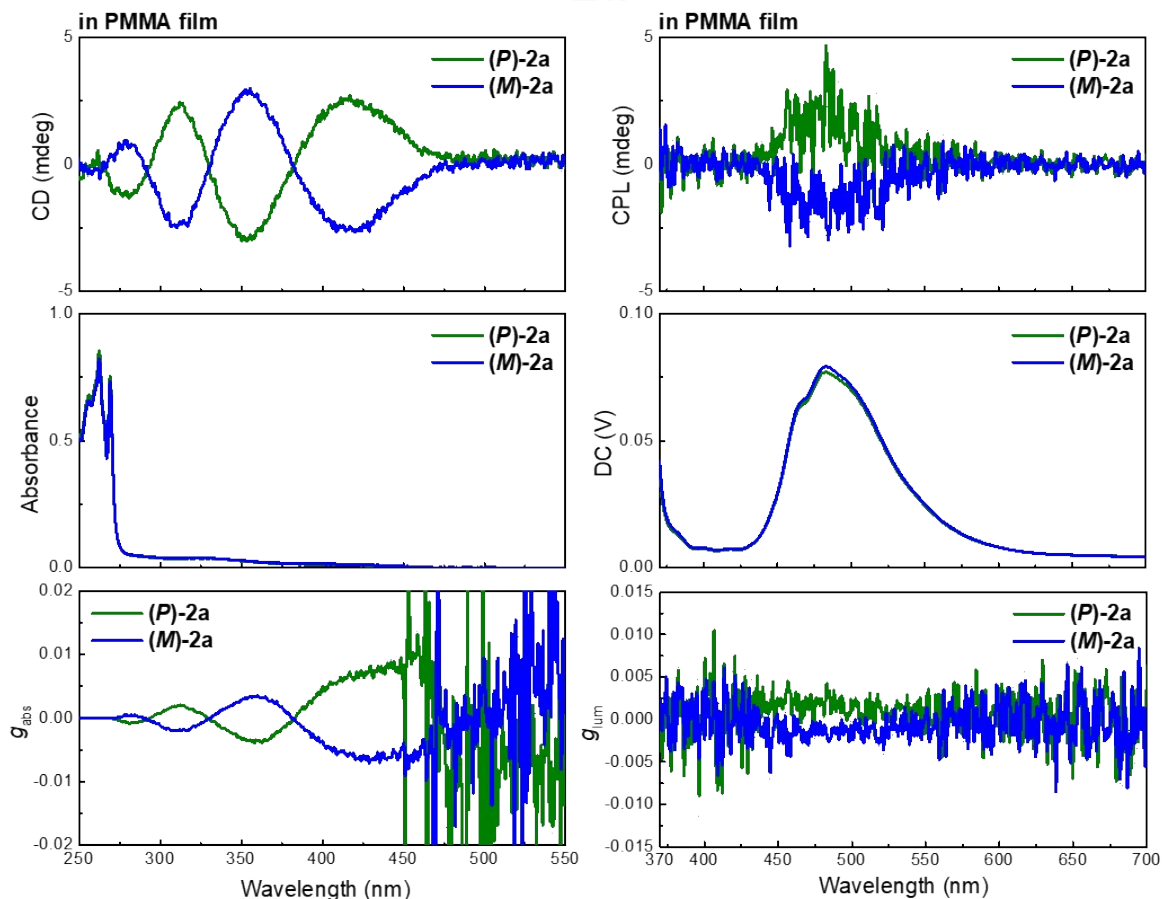

**Figure S39.** (Left) CD, absorption, and  $g_{\text{abs}}$  spectra of (*P*)-**2a** (green) and (*M*)-**2a** (blue) in PMMA film. (Right) CPL, DC (nonpolarized fluorescence) and  $g_{\text{lum}}$  spectra of (*P*)-**2a** (green) and (*M*)-**2a** (blue) in PMMA film. Excited at 330 nm.

### Density-Functional Theory Calculations.

Theoretical calculations were performed using Gaussian 16, revision A.03. Ground state ( $S_0$ ) geometries were optimized by density-functional theory (DFT) level with the B3LYP/6-31G(d,p) level. Equilibrium geometries were verified via frequency calculation, where no imaginary frequency was found. TD-DFT calculations were performed using TD-cam-B3LYP/6-31G(d,p) level for the first 30 singlet-singlet transitions with an additional keyword of IOP(9/40=2). First singlet excited state ( $S_1$ ) geometries were optimized using cam-B3LYP/6-31G(d,p) level. DFT data were visualized and analyzed with Chemcraft or GaussView 6.0.

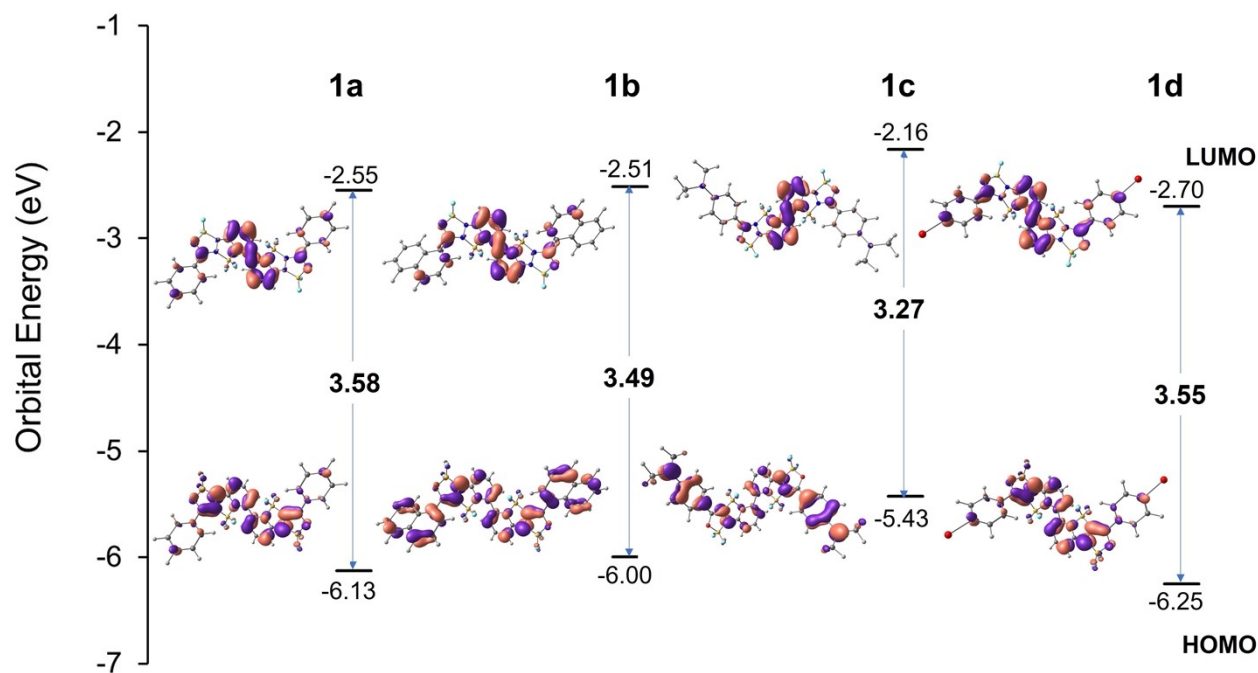

Figure S40-1. Frontier molecular orbitals of 1a–1d.

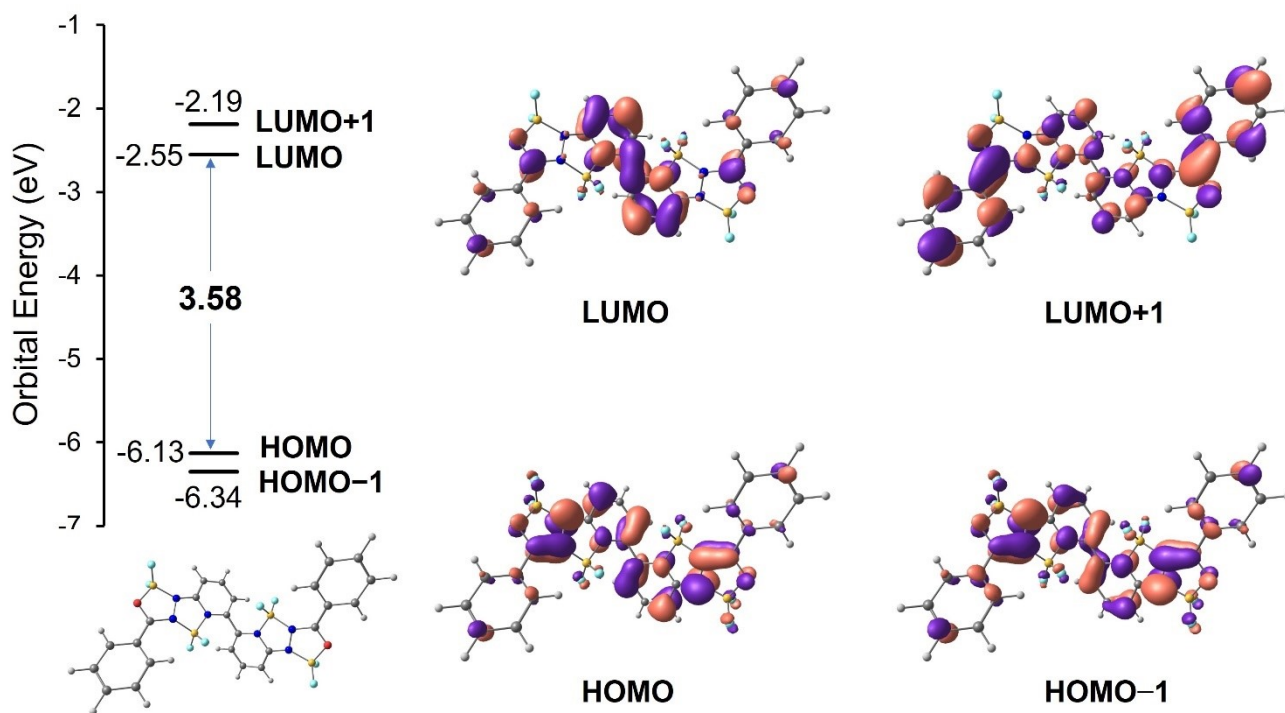

Figure S40-2. Frontier molecular orbitals of 1a.

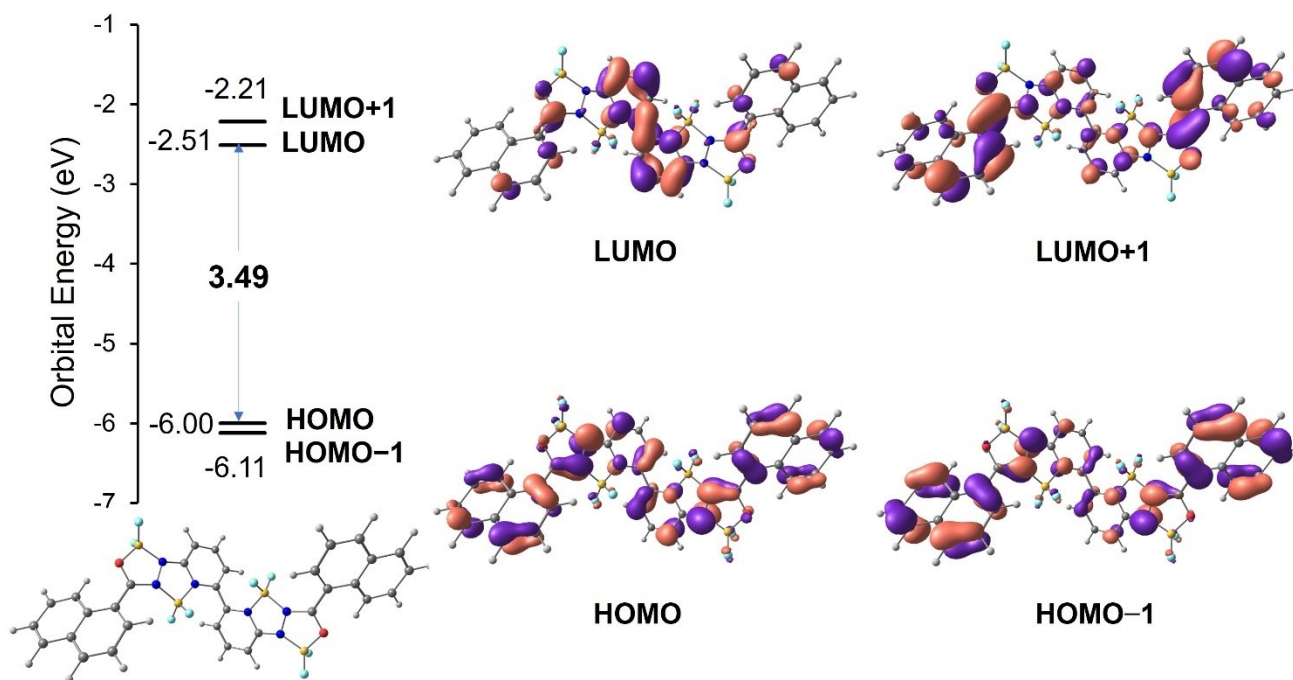

Figure S40-3. Frontier molecular orbitals of 1b.

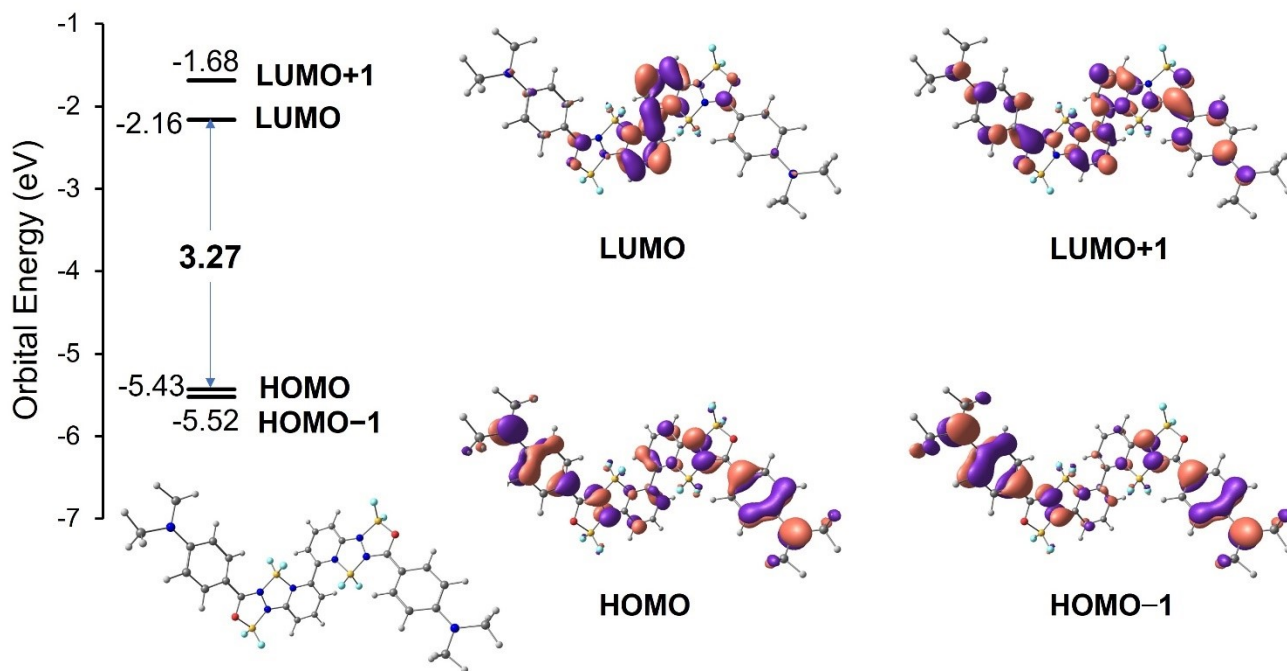

Figure S40-4. Frontier molecular orbitals of 1c.

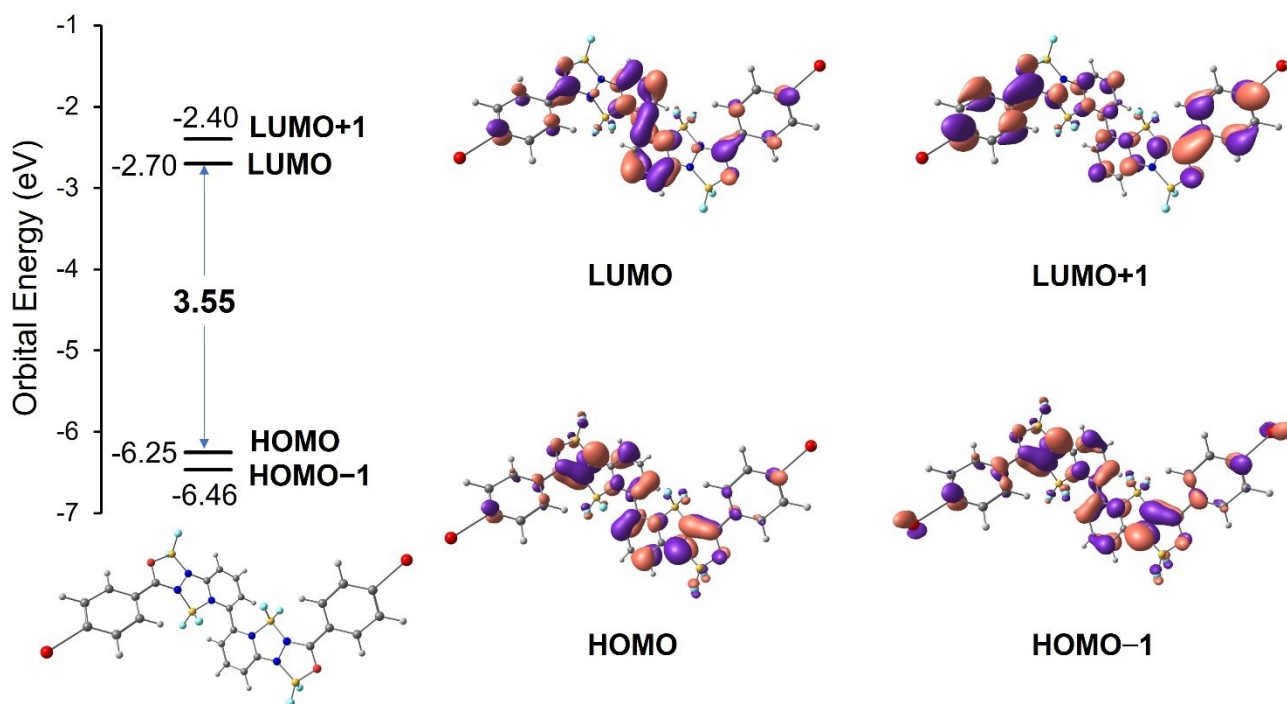

Figure S40-5. Frontier molecular orbitals of 1d.

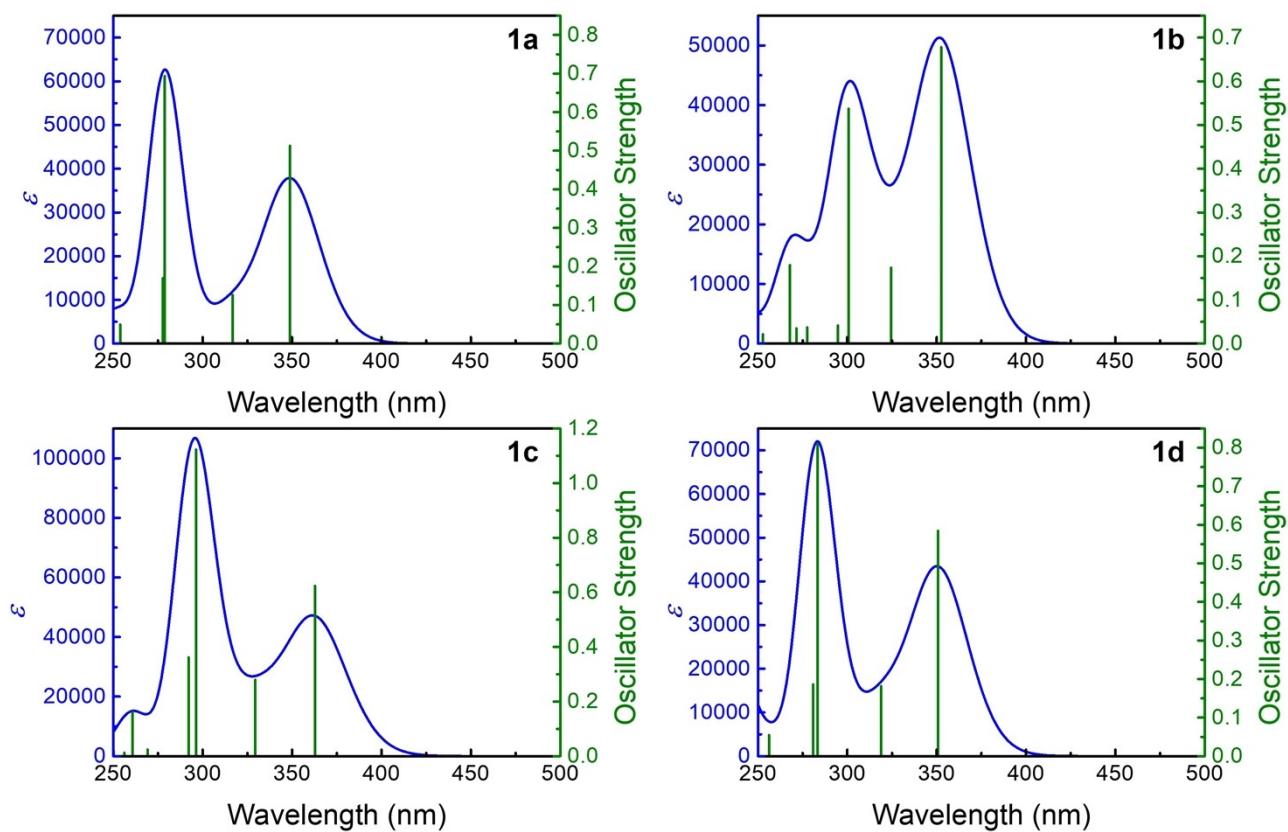

**Figure S41.** Calculated UV-vis absorption spectra of **1a–1d** by TD-DFT method.



**Table S12.** Calculated photophysical property data of the ground state for **1a–1d** at the cam-B3LYP/6-31G(d,p) level.

|           | Electronic Transition          | TD//cam-B3LYP/6-31G(d,p) |           |                |                                                                  |
|-----------|--------------------------------|--------------------------|-----------|----------------|------------------------------------------------------------------|
|           |                                | Energy/eV <sup>a</sup>   |           | f <sup>b</sup> | Major contributions                                              |
| <b>1a</b> | S <sub>0</sub> →S <sub>1</sub> | 3.5537 eV                | 348.88 nm | 0.5130         | H-1->L+1 (15%), HOMO->LUMO (79%)                                 |
|           | S <sub>0</sub> →S <sub>2</sub> | 3.9143 eV                | 316.75 nm | 0.1263         | H-1->LUMO (62%), HOMO->L+1 (30%)                                 |
|           | S <sub>0</sub> →S <sub>3</sub> | 4.4461 eV                | 278.86 nm | 0.6939         | H-1->L+1 (30%), HOMO->L+2 (57%)                                  |
|           | S <sub>0</sub> →S <sub>4</sub> | 4.4626 eV                | 277.83 nm | 0.1702         | H-1->LUMO (14%), H-1->L+2 (41%), HOMO->L+1 (37%)                 |
| <b>1b</b> | S <sub>0</sub> →S <sub>1</sub> | 3.5167 eV                | 352.56 nm | 0.6782         | H-1->L+1 (16%), HOMO->LUMO (64%)                                 |
|           | S <sub>0</sub> →S <sub>2</sub> | 3.8207 eV                | 324.51 nm | 0.1737         | H-1->LUMO (44%), HOMO->L+1 (36%)                                 |
|           | S <sub>0</sub> →S <sub>3</sub> | 4.1232 eV                | 300.70 nm | 0.5374         | H-2->LUMO (18%), H-1->L+1 (29%), HOMO->L+2 (39%)                 |
|           | S <sub>0</sub> →S <sub>4</sub> | 4.2058 eV                | 294.79 nm | 0.0416         | H-3->LUMO (26%), H-2->L+1 (11%), H-1->L+2 (36%), HOMO->L+1 (10%) |
| <b>1c</b> | S <sub>0</sub> →S <sub>1</sub> | 3.4176 eV                | 362.79 nm | 0.6241         | H-2->LUMO (18%), H-1->L+1 (14%), HOMO->LUMO (59%)                |
|           | S <sub>0</sub> →S <sub>2</sub> | 3.7636 eV                | 329.43 nm | 0.2798         | H-3->LUMO (16%), H-1->LUMO (46%), HOMO->L+1 (28%)                |
|           | S <sub>0</sub> →S <sub>3</sub> | 4.1847 eV                | 296.28 nm | 1.1234         | H-2->LUMO (11%), H-1->L+1 (27%), HOMO->L+2 (44%)                 |
|           | S <sub>0</sub> →S <sub>4</sub> | 4.2439 eV                | 292.15 nm | 0.3620         | H-3->LUMO (16%), H-1->L+2 (35%), HOMO->L+1 (23%)                 |
| <b>1d</b> | S <sub>0</sub> →S <sub>1</sub> | 3.5346 eV                | 350.77 nm | 0.5845         | H-1->L+1 (16%), HOMO->LUMO (76%)                                 |
|           | S <sub>0</sub> →S <sub>2</sub> | 3.8887 eV                | 318.83 nm | 0.1821         | H-1->LUMO (58%), HOMO->L+1 (33%)                                 |
|           | S <sub>0</sub> →S <sub>3</sub> | 4.3751 eV                | 283.38 nm | 0.8106         | H-1->L+1 (29%), HOMO->L+2 (59%)                                  |
|           | S <sub>0</sub> →S <sub>4</sub> | 4.4144 eV                | 280.86 nm | 0.1865         | H-1->LUMO (12%), H-1->L+2 (45%), HOMO->L+1 (31%)                 |

<sup>a</sup>Only the selected low-lying excited states are presented. <sup>b</sup>Oscillator strength.

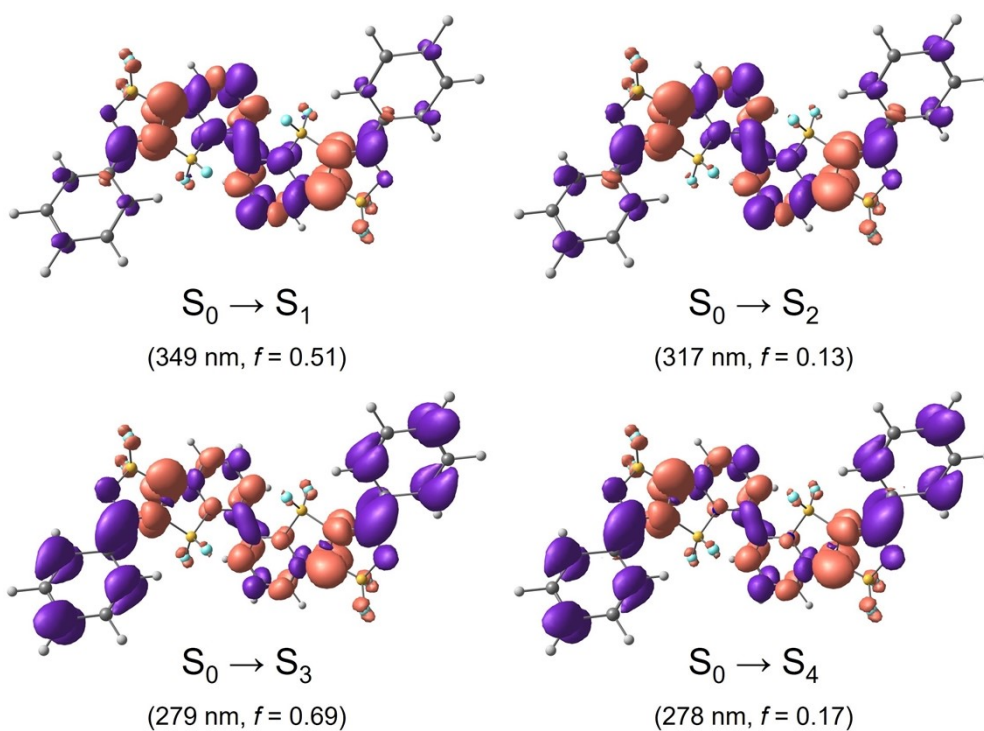

**Figure S42-1.** TD-DFT-calculated  $S_0 \rightarrow S_1$ ,  $S_0 \rightarrow S_2$ ,  $S_0 \rightarrow S_3$ , and  $S_0 \rightarrow S_4$  transitions of **1a**.

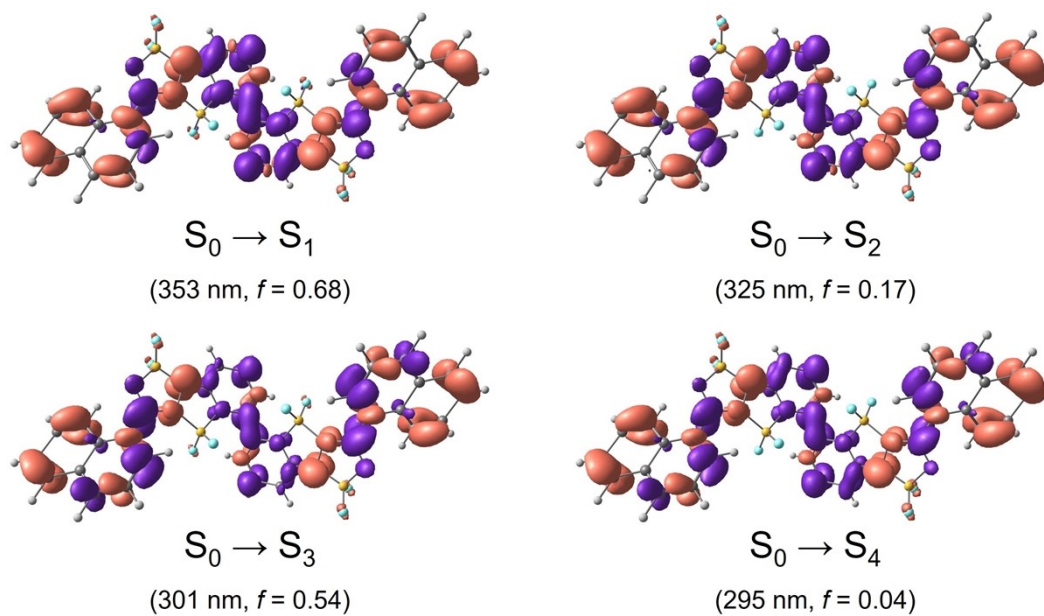

**Figure S42-2.** TD-DFT-calculated  $S_0 \rightarrow S_1$ ,  $S_0 \rightarrow S_2$ ,  $S_0 \rightarrow S_3$ , and  $S_0 \rightarrow S_4$  transitions of **1b**.

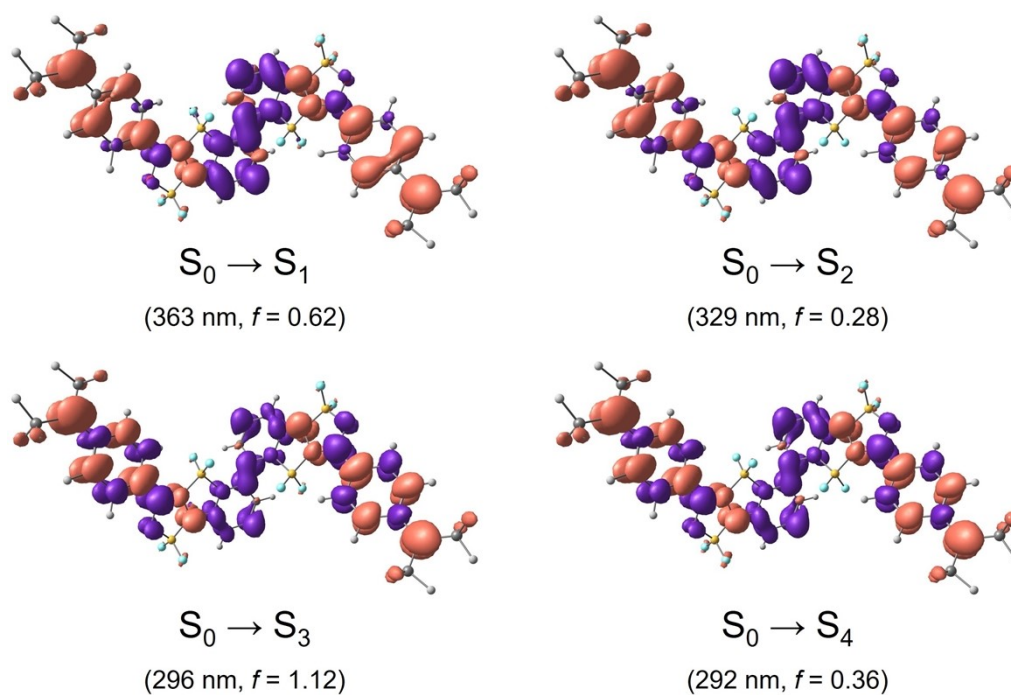

**Figure S42-3.** TD-DFT-calculated  $S_0 \rightarrow S_1$ ,  $S_0 \rightarrow S_2$ ,  $S_0 \rightarrow S_3$ , and  $S_0 \rightarrow S_4$  transitions of **1c**.

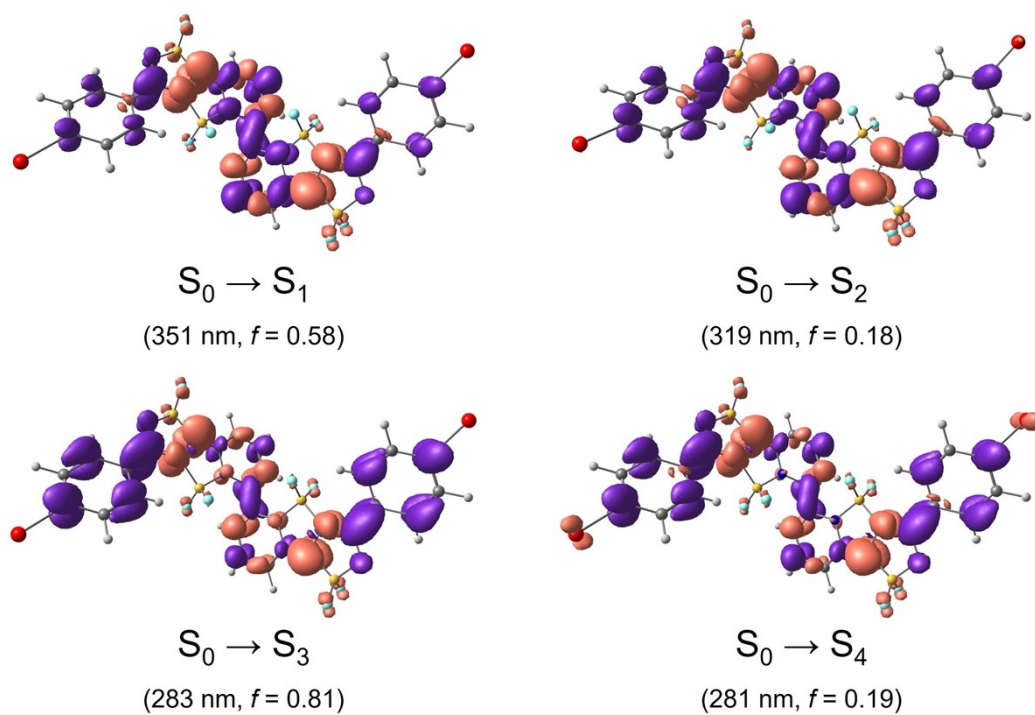

**Figure S42-4.** TD-DFT-calculated  $S_0 \rightarrow S_1$ ,  $S_0 \rightarrow S_2$ ,  $S_0 \rightarrow S_3$ , and  $S_0 \rightarrow S_4$  transitions of **1d**.

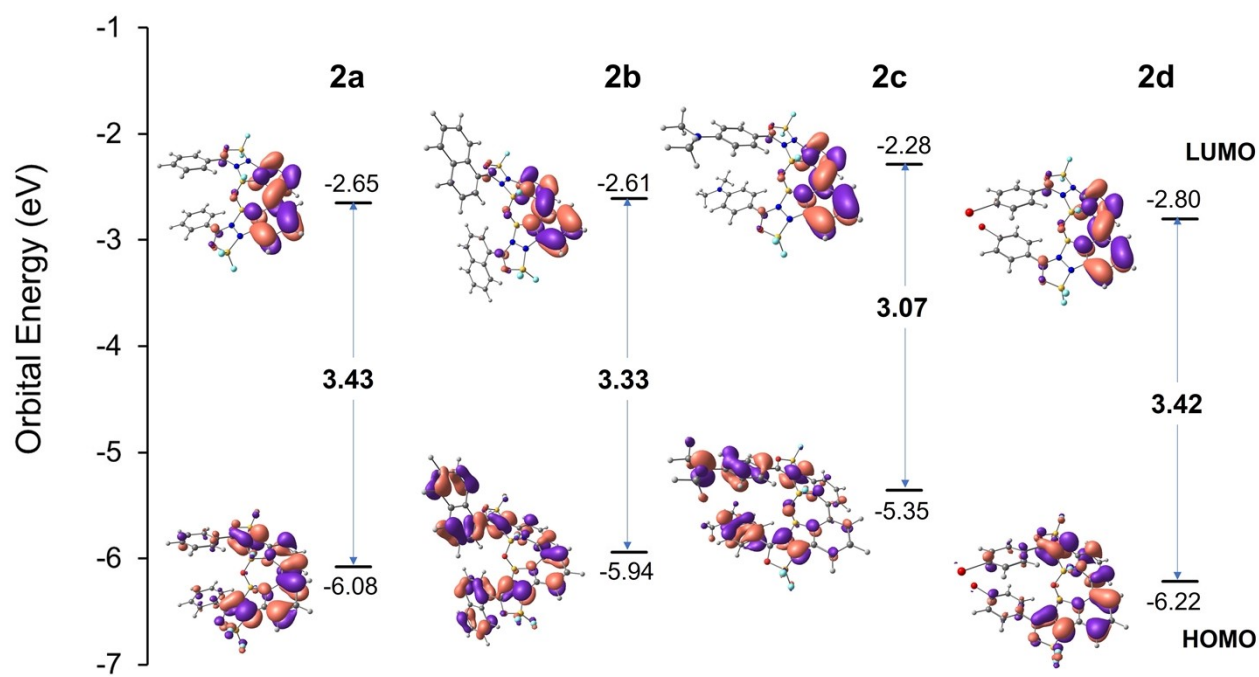

**Figure S43.** Frontier molecular orbitals of **2a–2d**.

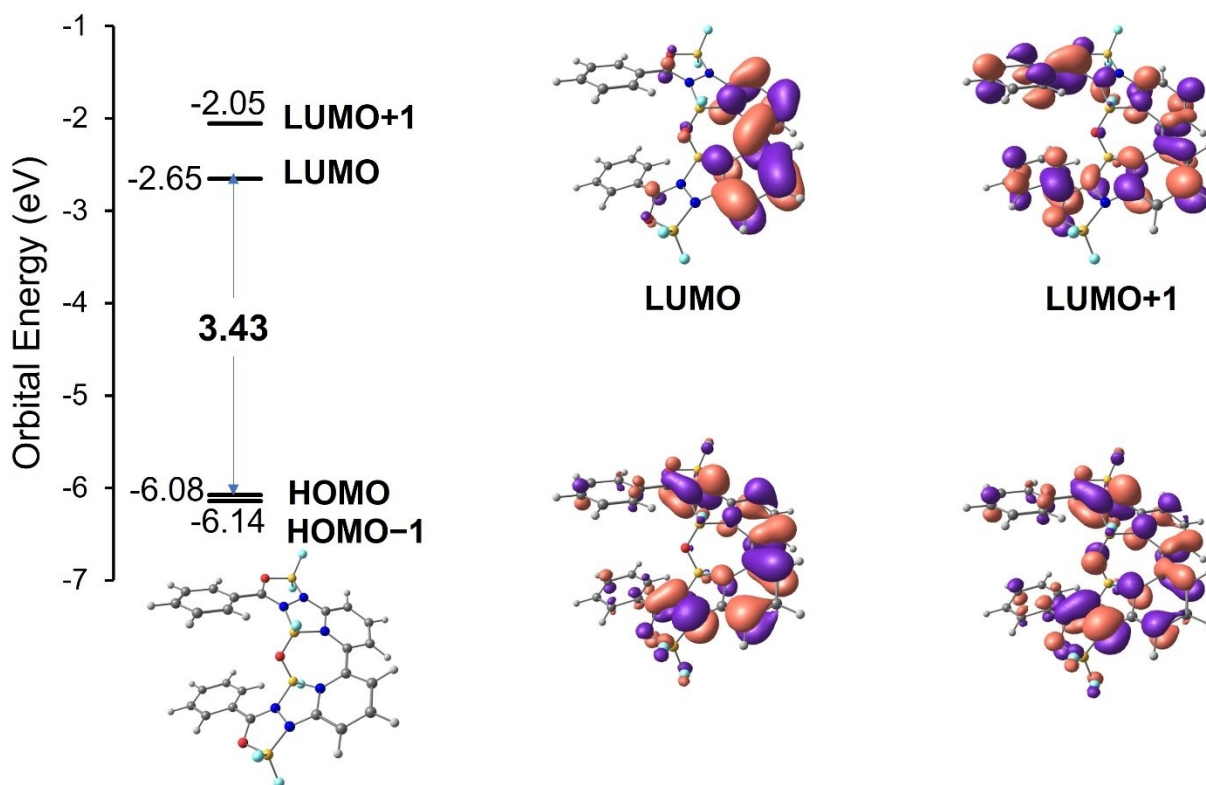

Figure S44-1. Frontier molecular orbitals of (*P*)-2a.

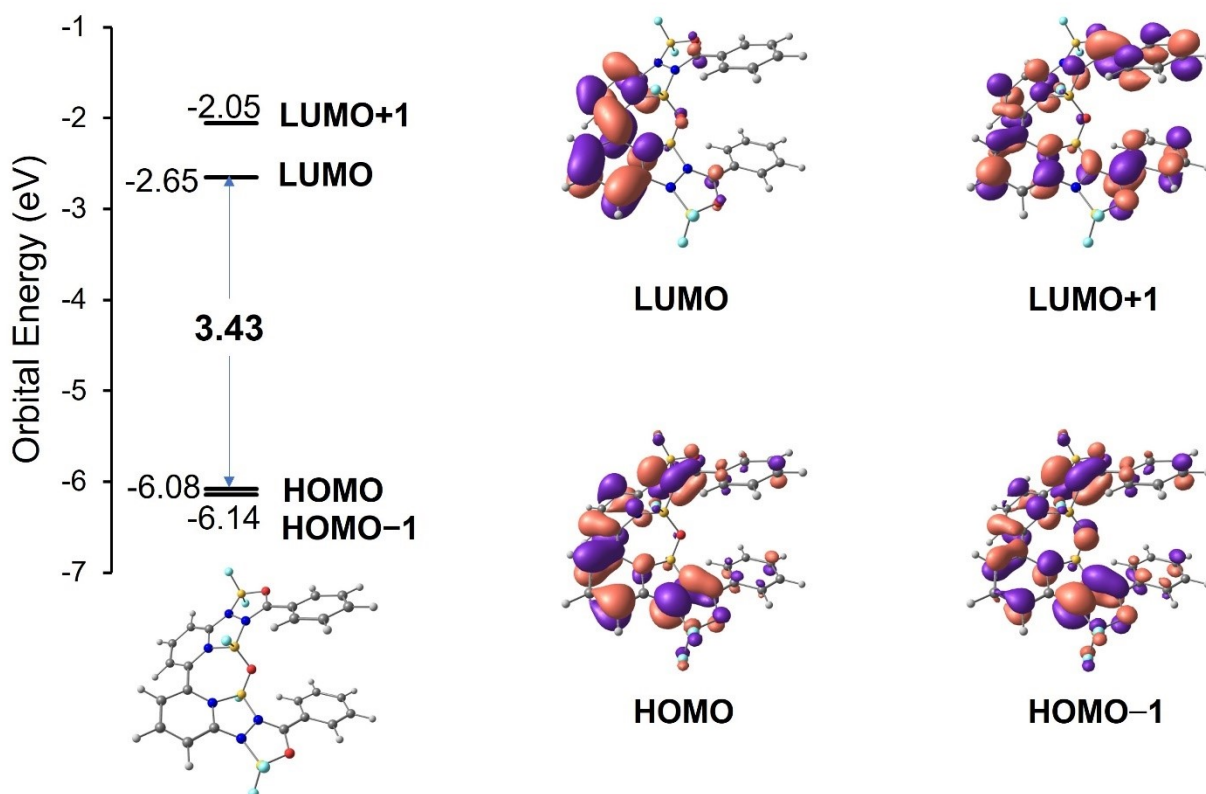

Figure S44-2. Frontier molecular orbitals of (*M*)-2a.

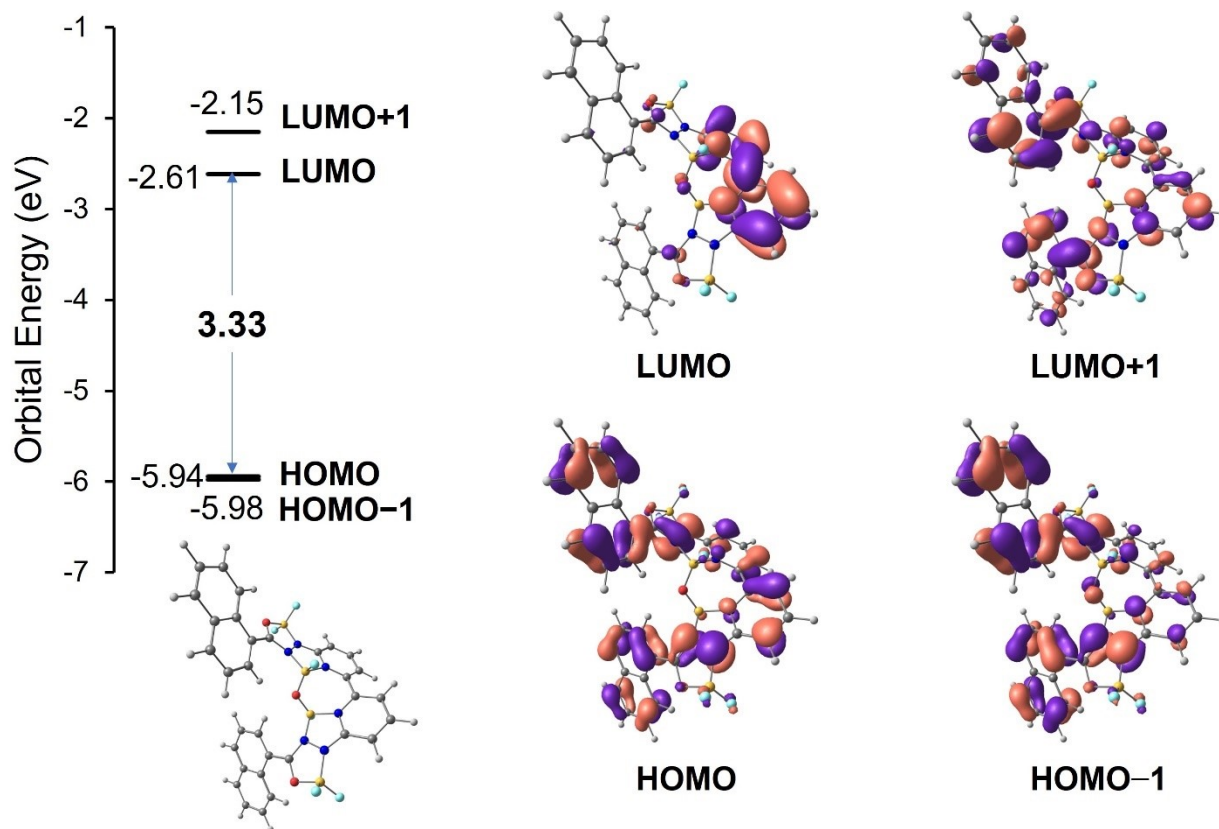

Figure S45-1. Frontier molecular orbitals of (*P*)-2b.

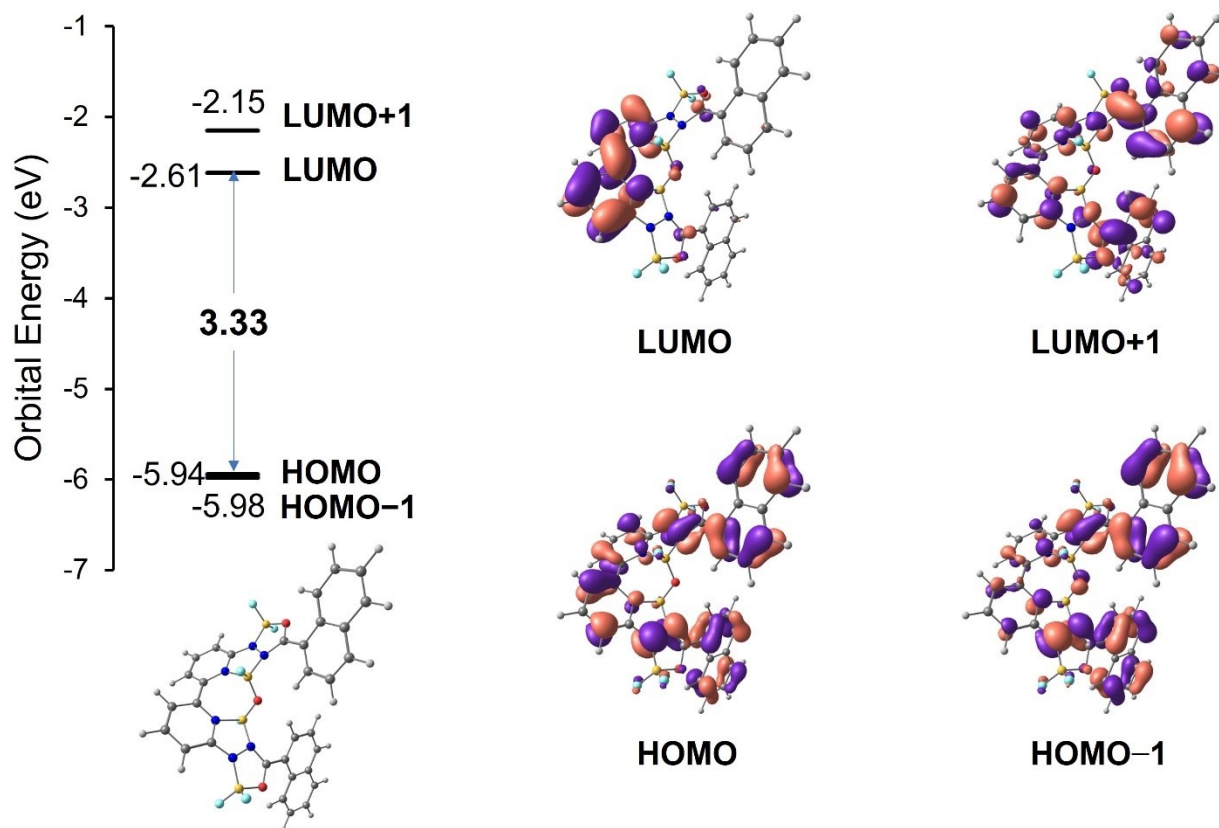

Figure S45-2. Frontier molecular orbitals of (*M*)-2b.

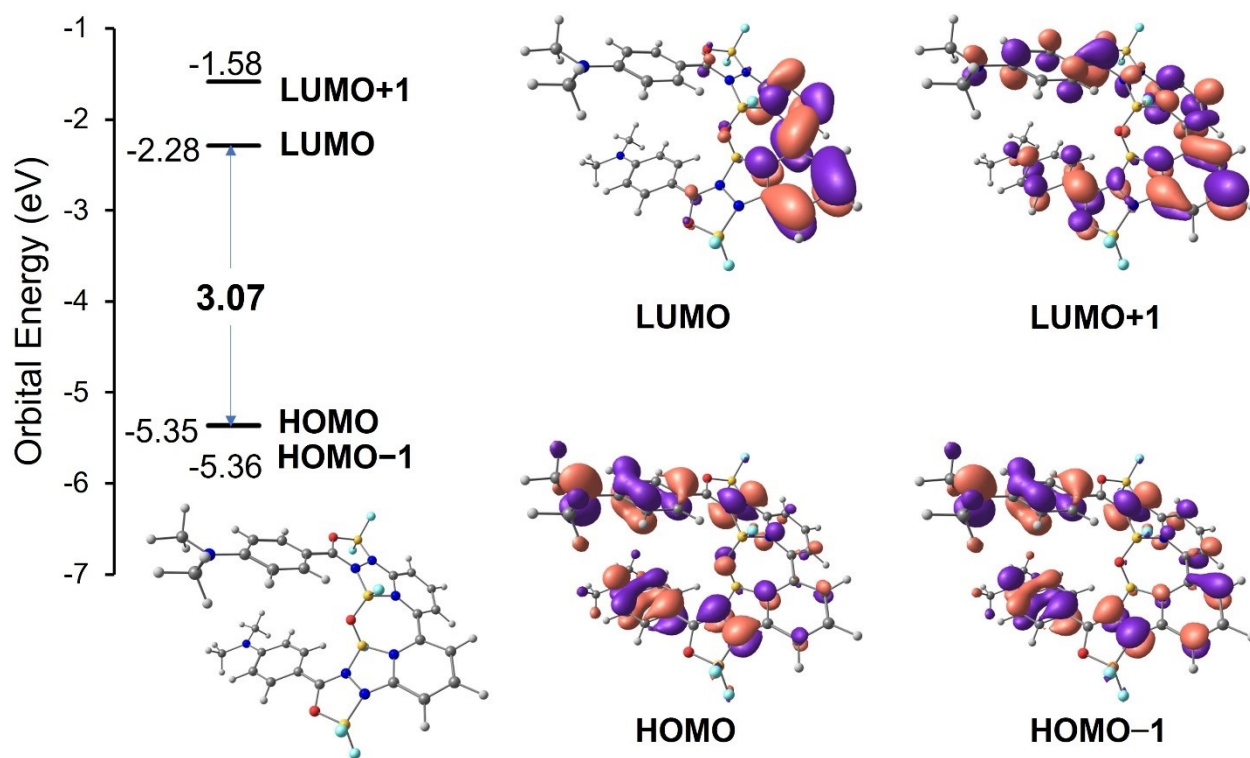

Figure S46-1. Frontier molecular orbitals of (*P*)-2c.

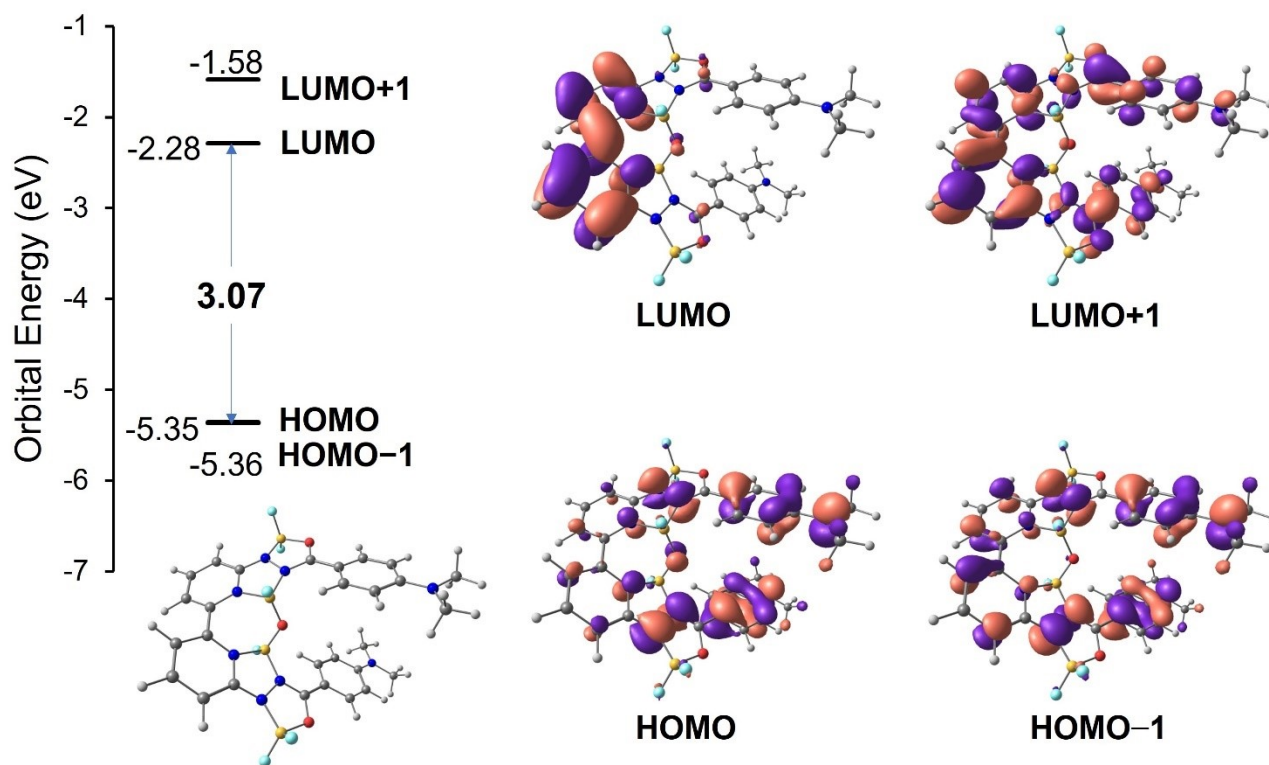

Figure S46-2. Frontier molecular orbitals of (*M*)-2c.

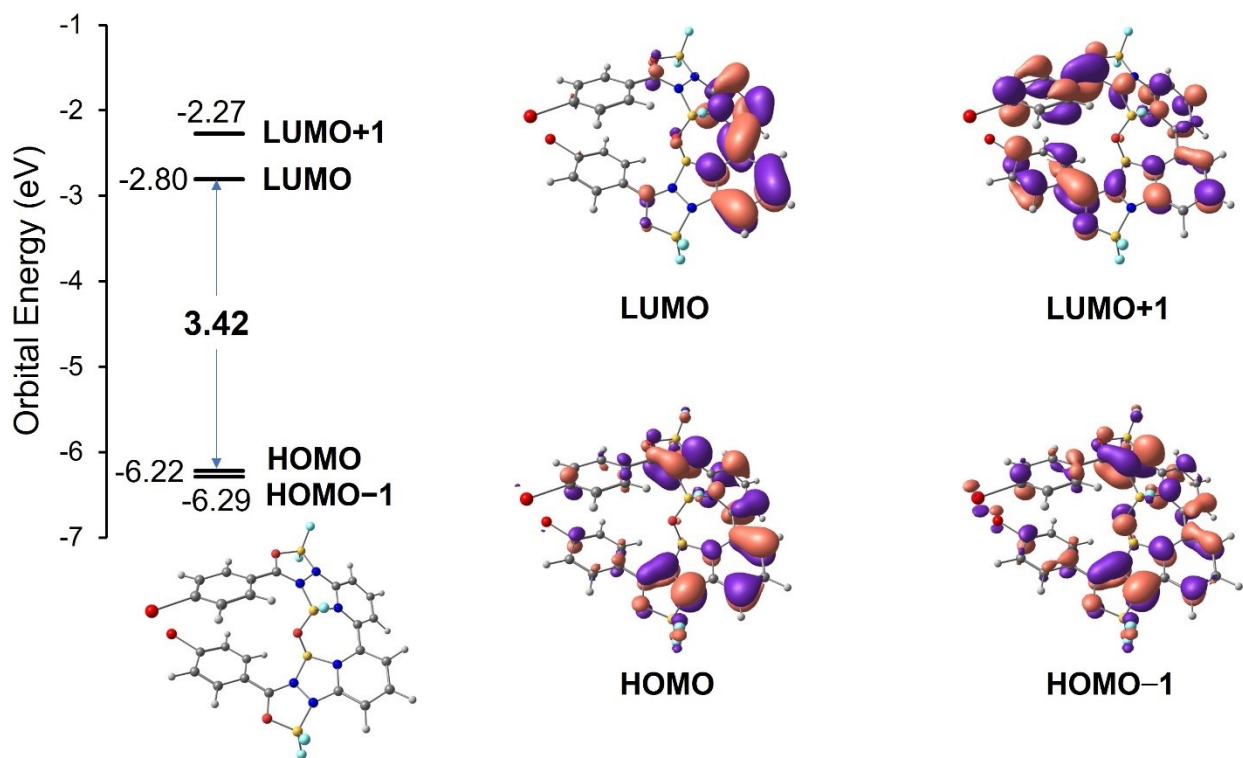

Figure S47-1. Frontier molecular orbitals of (*P*)-2d.

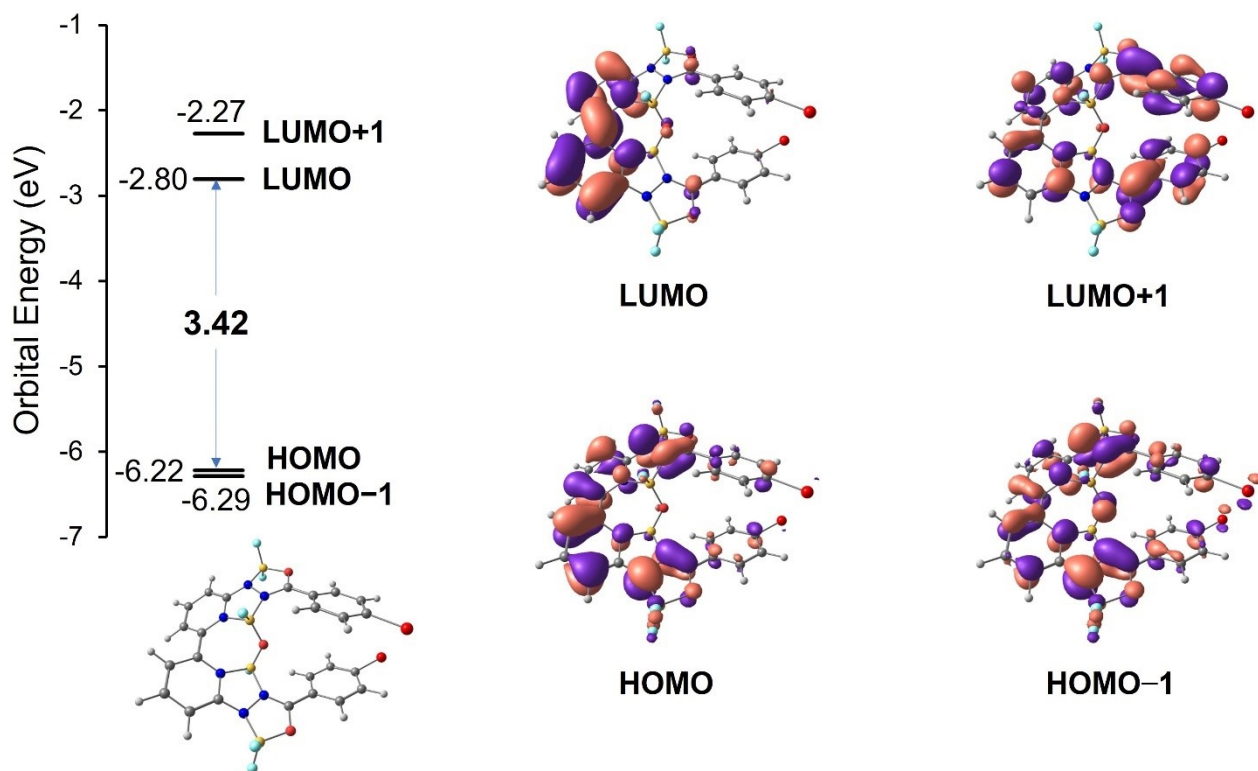

Figure S47-2. Frontier molecular orbitals of (*M*)-2d.



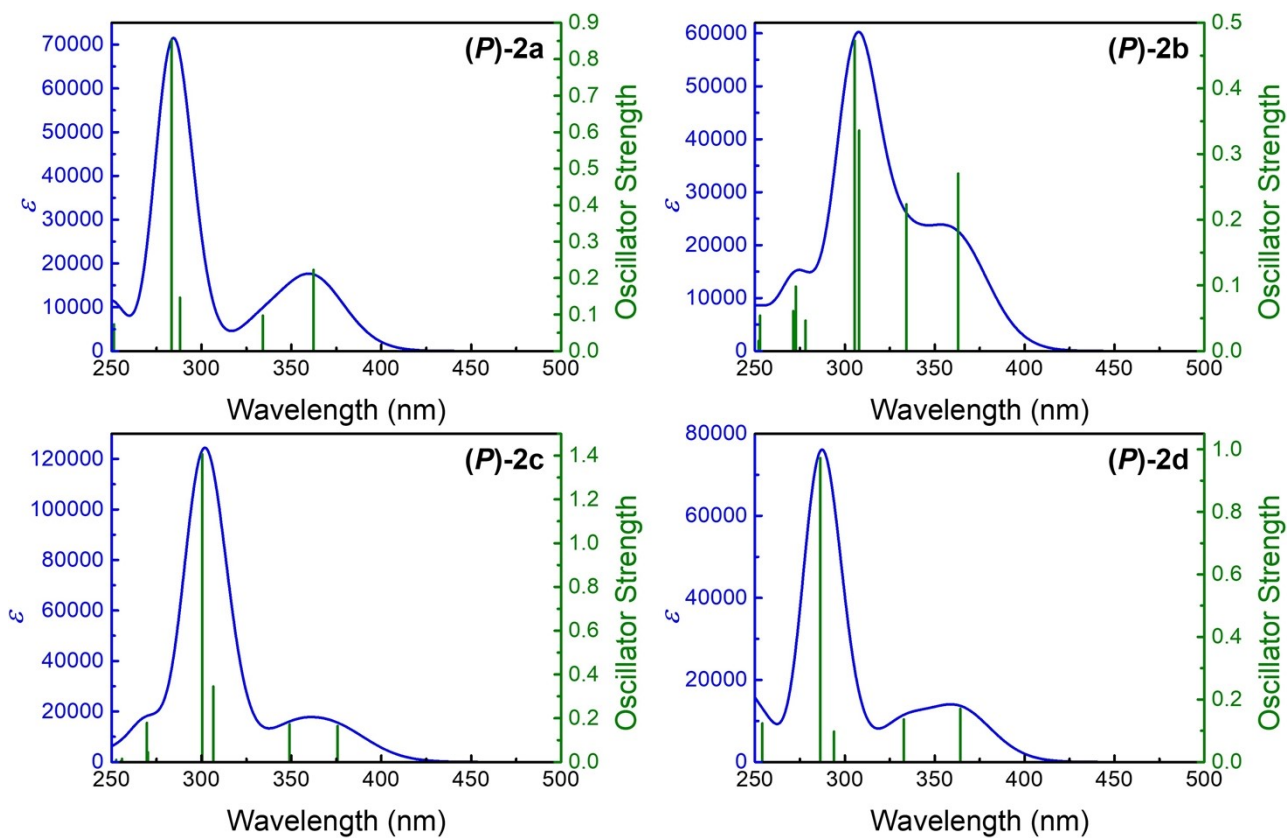

**Figure S48-1.** Calculated UV-vis absorption spectra of *(P)*-enantiomers of **2a**–**2d** by TD-DFT method.

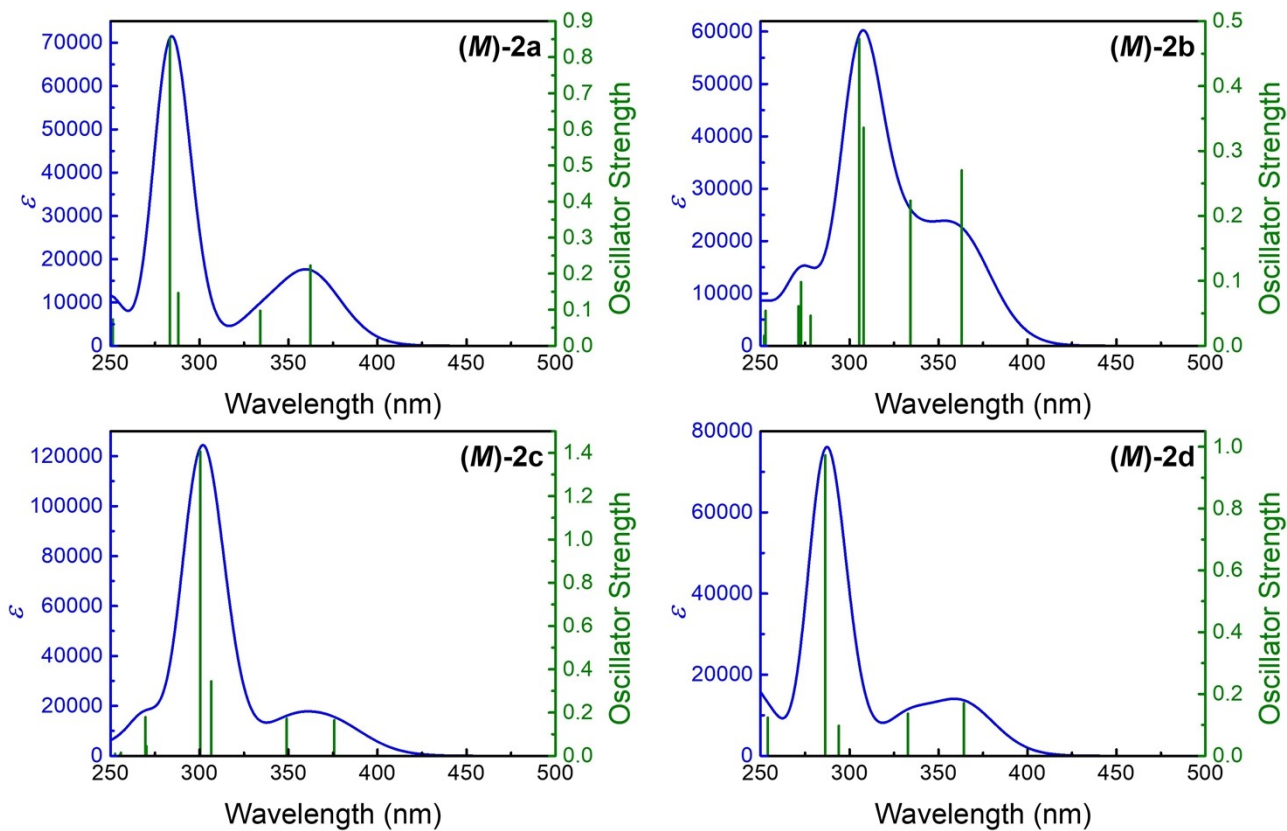

**Figure S48-2.** Calculated UV-vis absorption spectra of (*M*)-enantiomers of **2a–2d** by TD-DFT method.

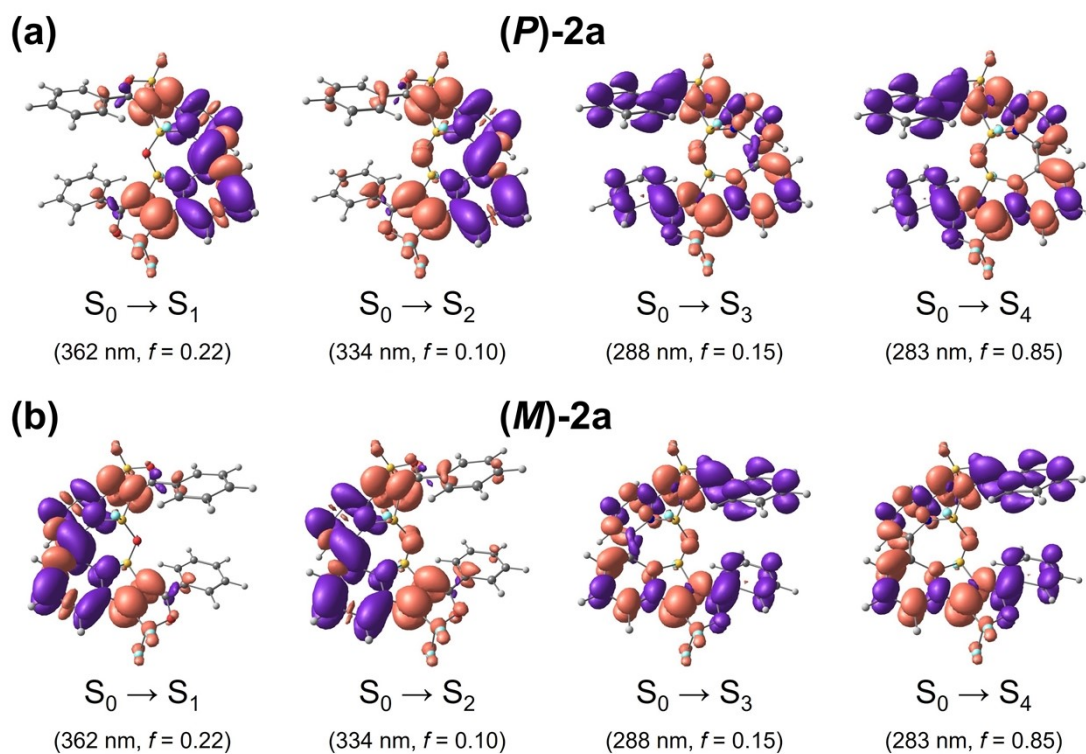

**Figure S49-1.** TD-DFT-calculated  $S_0 \rightarrow S_1$ ,  $S_0 \rightarrow S_2$ ,  $S_0 \rightarrow S_3$ , and  $S_0 \rightarrow S_4$  transitions of (a) (*P*)-**2a** and (b) (*M*)-**2a**.

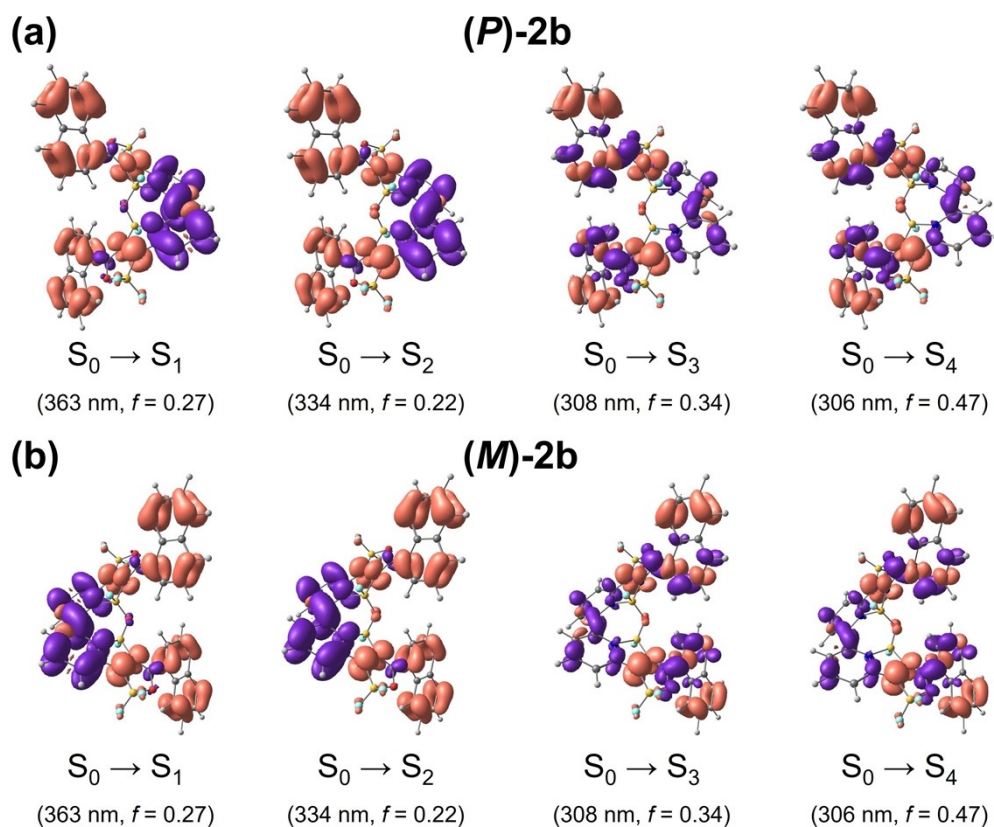

**Figure S49-2.** TD-DFT-calculated  $S_0 \rightarrow S_1$ ,  $S_0 \rightarrow S_2$ ,  $S_0 \rightarrow S_3$ , and  $S_0 \rightarrow S_4$  transitions of (a) (*P*)-2b and (b) (*M*)-2b.

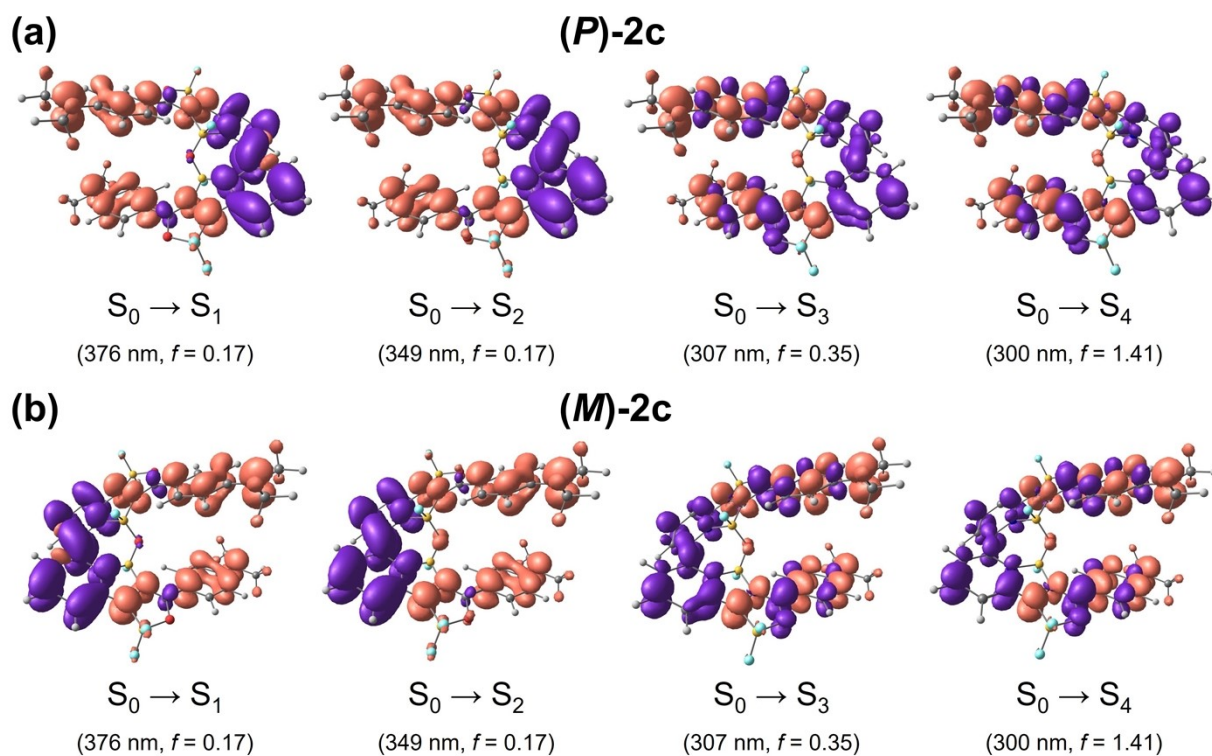

**Figure S49-3.** TD-DFT-calculated  $S_0 \rightarrow S_1$ ,  $S_0 \rightarrow S_2$ ,  $S_0 \rightarrow S_3$ , and  $S_0 \rightarrow S_4$  transitions of (a) (*P*)-2c and (b) (*M*)-2c.

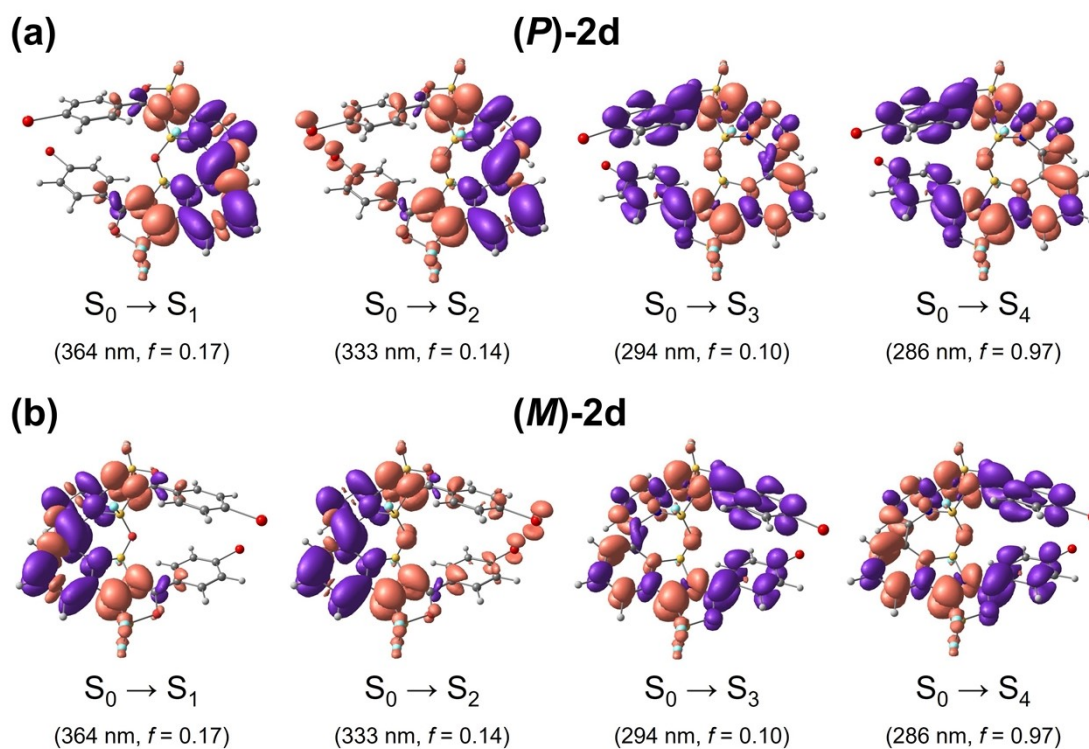

**Figure S49-4.** TD-DFT-calculated  $S_0 \rightarrow S_1$ ,  $S_0 \rightarrow S_2$ ,  $S_0 \rightarrow S_3$ , and  $S_0 \rightarrow S_4$  transitions of (a) (*P*)-**2d** and (b) (*M*)-**2d**.

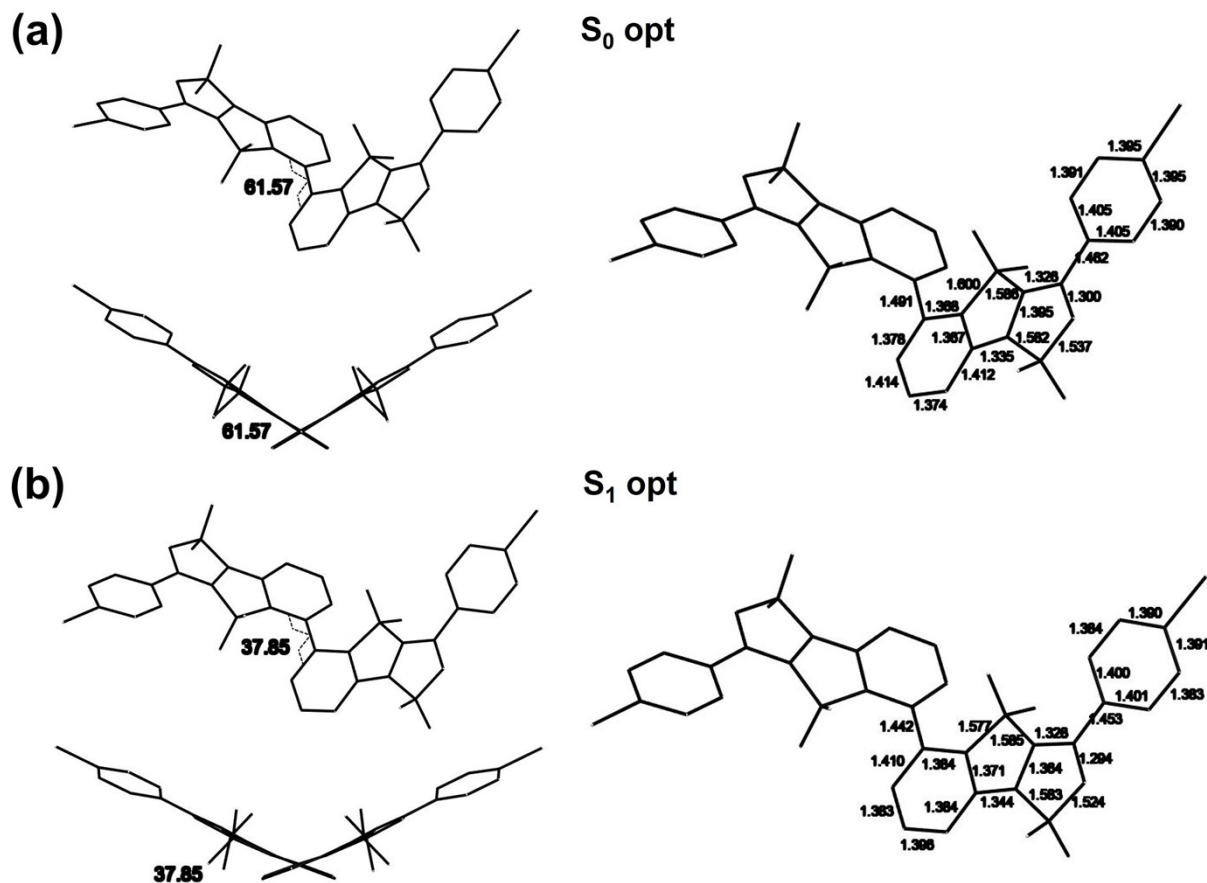

**Figure S50-1.** Optimized geometries of **1d** in (a)  $S_0$  and (b)  $S_1$  showing representative bond length (Å). The bond length between the carbon atoms of bipyridine is 1.491 Å in  $S_0$ , but it is shortened to 1.442 Å in  $S_1$ . The torsion angle is 61.57 degree for  $S_0$ , while it is 37.85 degree in the  $S_1$  state, suggesting that the compound is more planar conformation in the  $S_1$  state than in the  $S_0$  state.

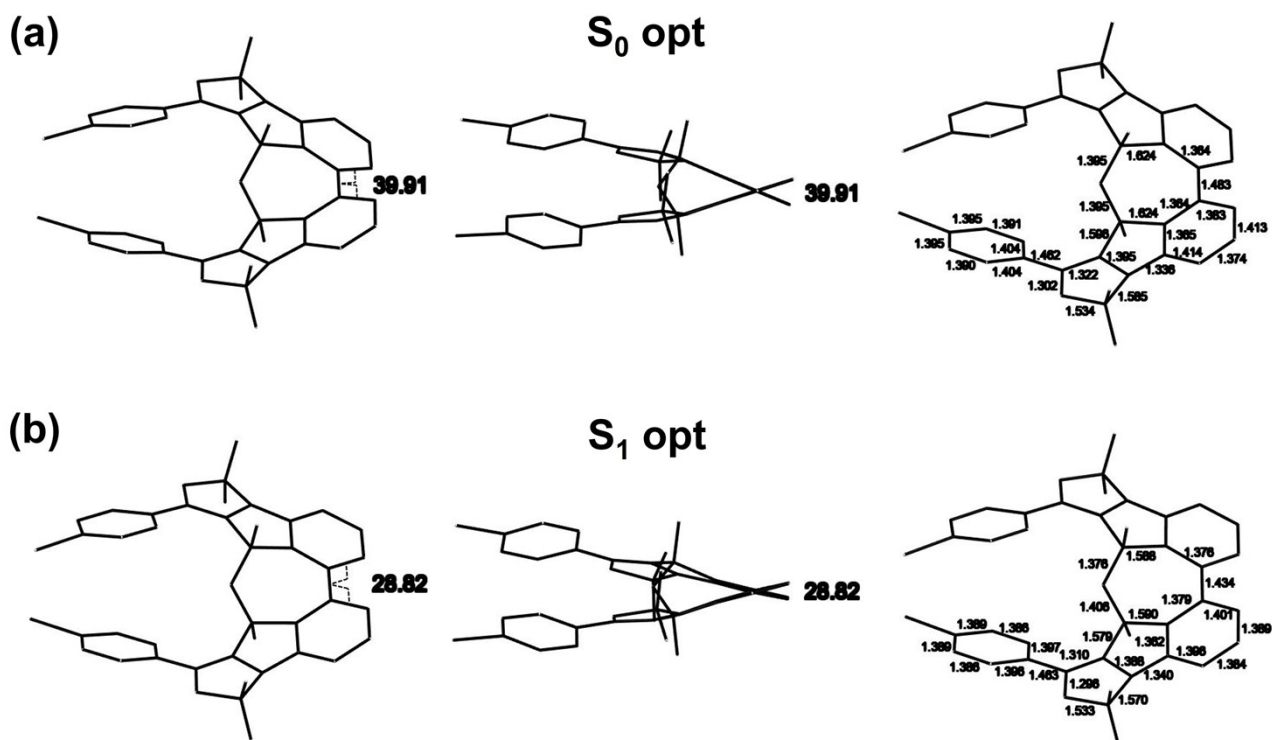

**Figure S50-2.** Optimized geometries of **2d** in (a)  $S_0$  and (b)  $S_1$  showing representative bond length (Å). The bond length between the carbon atoms of bipyridine is 1.483 Å in  $S_0$ , but it is shortened to 1.434 Å in  $S_1$ . The torsion angle is 39.91 degree for  $S_0$ , while it is 28.82 degree in the  $S_1$  state, suggesting that the compound is more planar conformation in the  $S_1$  state than in the  $S_0$  state.

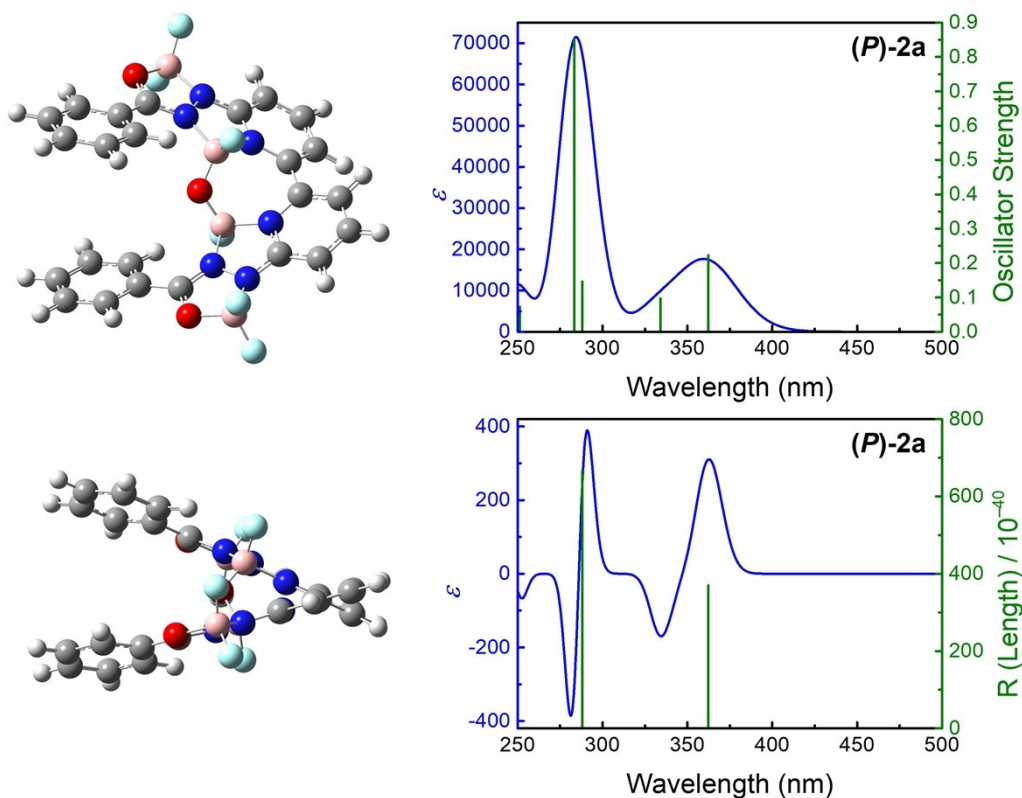

**Figure S51-1.** Calculated UV-vis and ECD spectra of **(P)-2a** by TD-DFT method [cam-B3LYP/6-31G(d,p)].

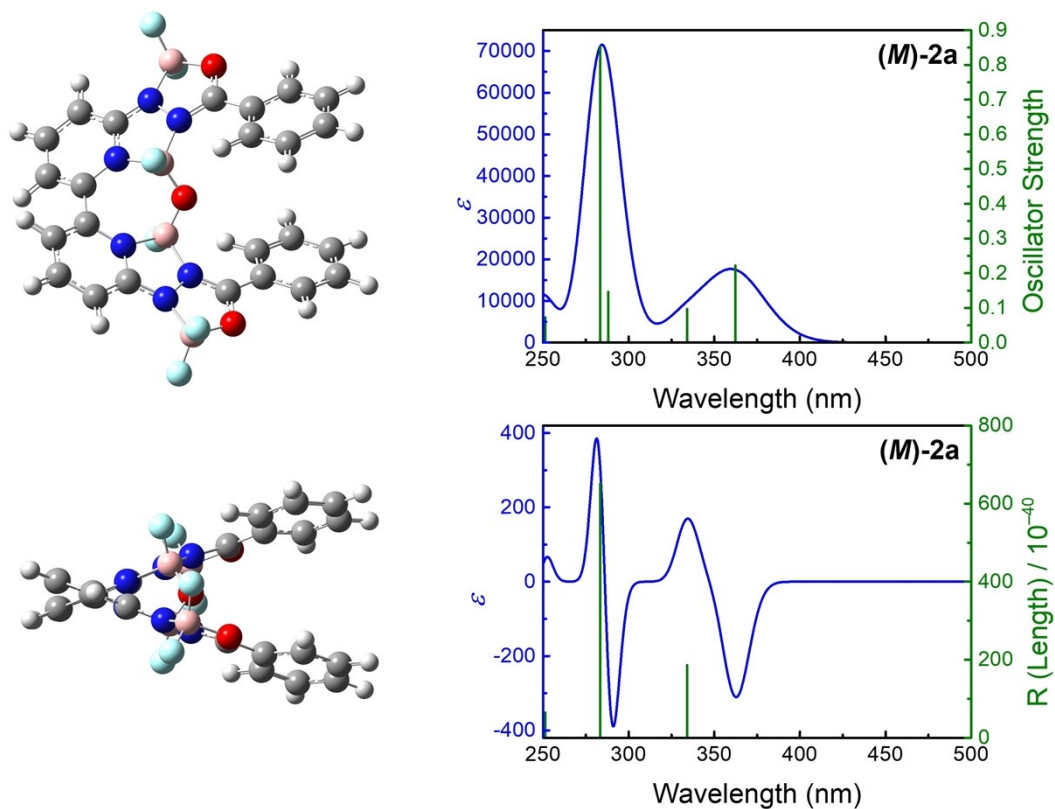

**Figure S51-2.** Calculated UV-vis and ECD spectra of **(M)-2a** by TD-DFT method [cam-B3LYP/6-31G(d,p)]

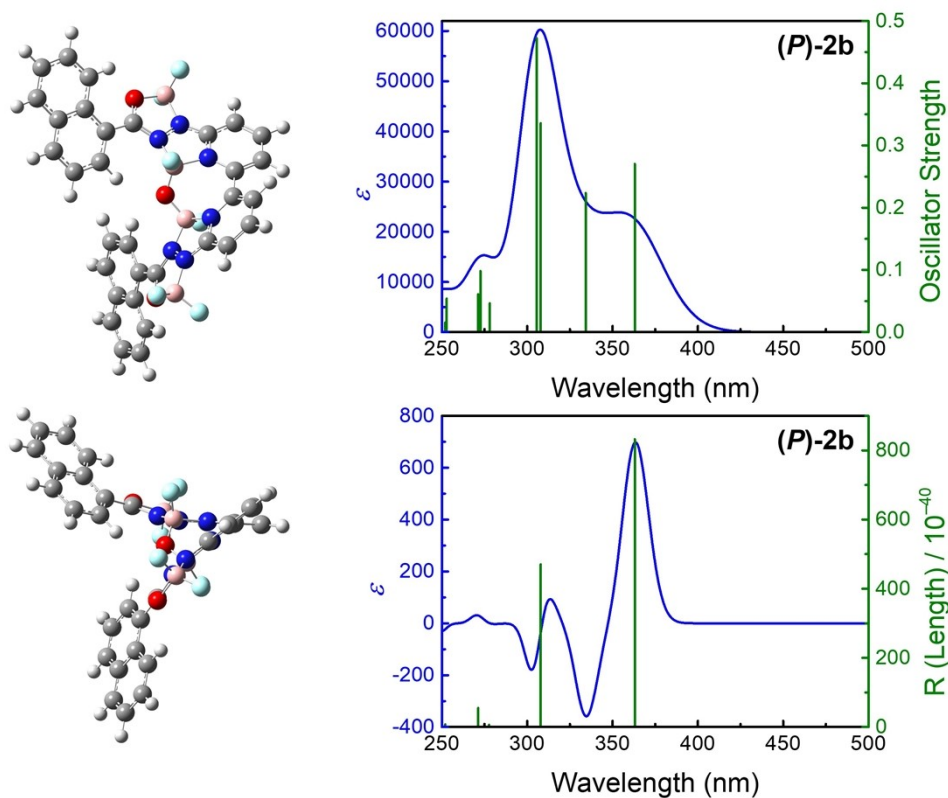

**Figure S52-1.** Calculated UV-vis and ECD spectra of **(P)-2b** by TD-DFT method [cam-B3LYP/6-31G(d,p)].

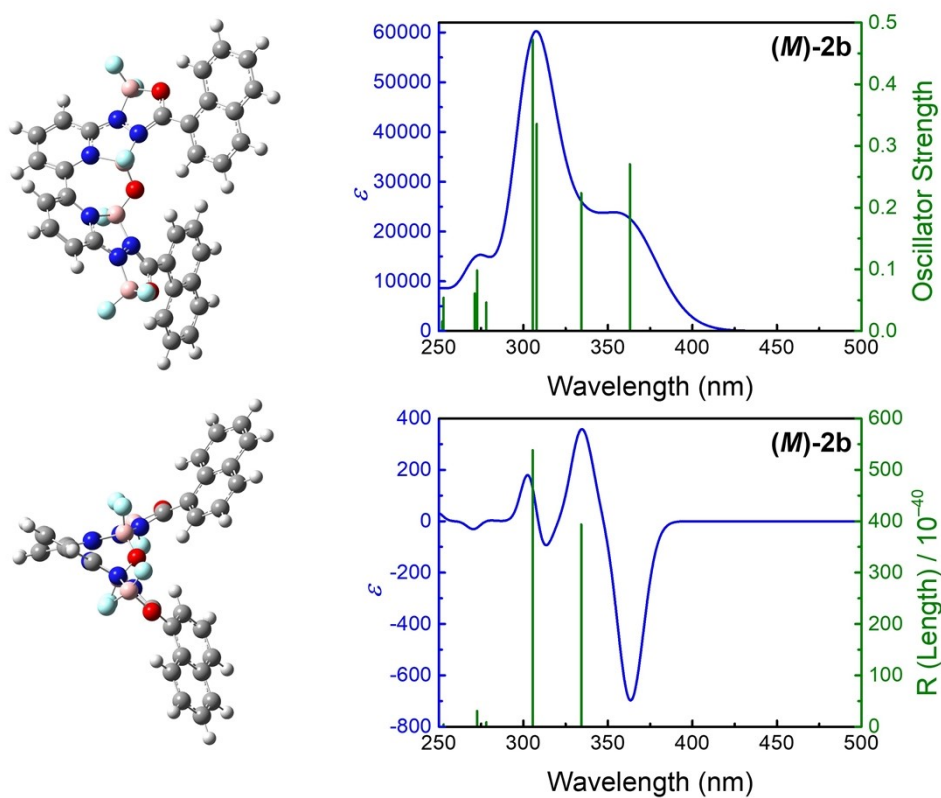

**Figure S52-2.** Calculated UV-vis and ECD spectra of **(M)-2b** by TD-DFT method [cam-B3LYP/6-31G(d,p)].

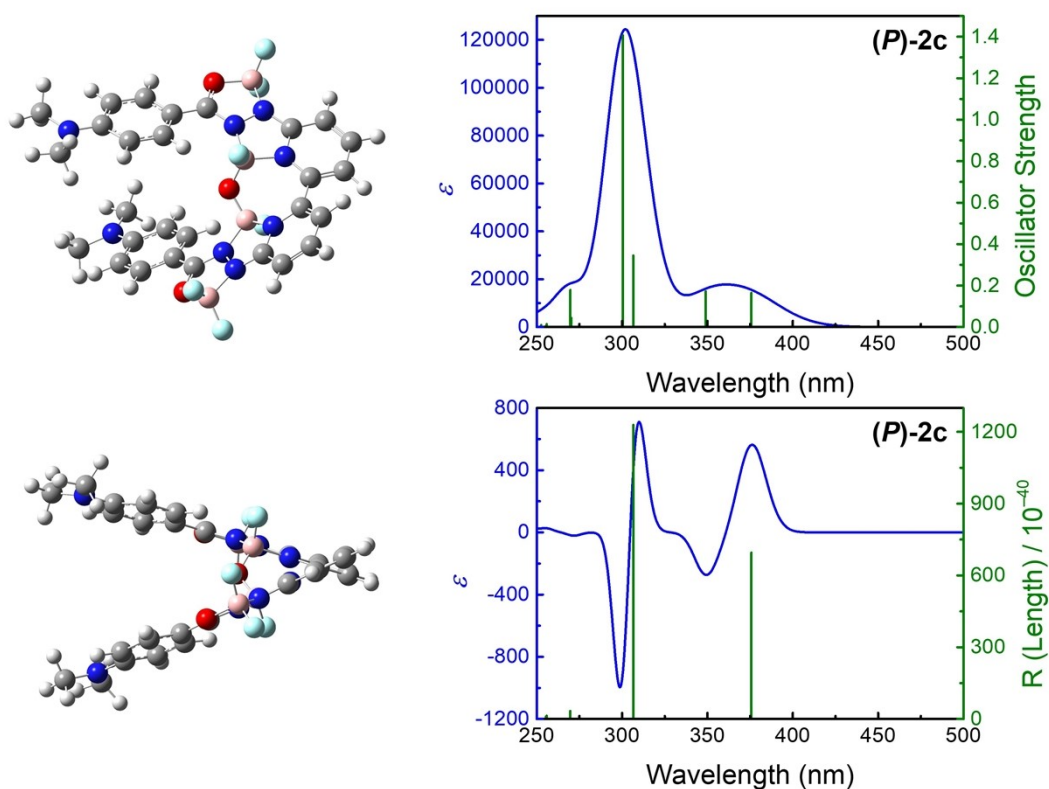

**Figure S53-1.** Calculated UV-vis and ECD spectra of **(P)-2c** by TD-DFT method [cam-B3LYP/6-31G(d,p)].

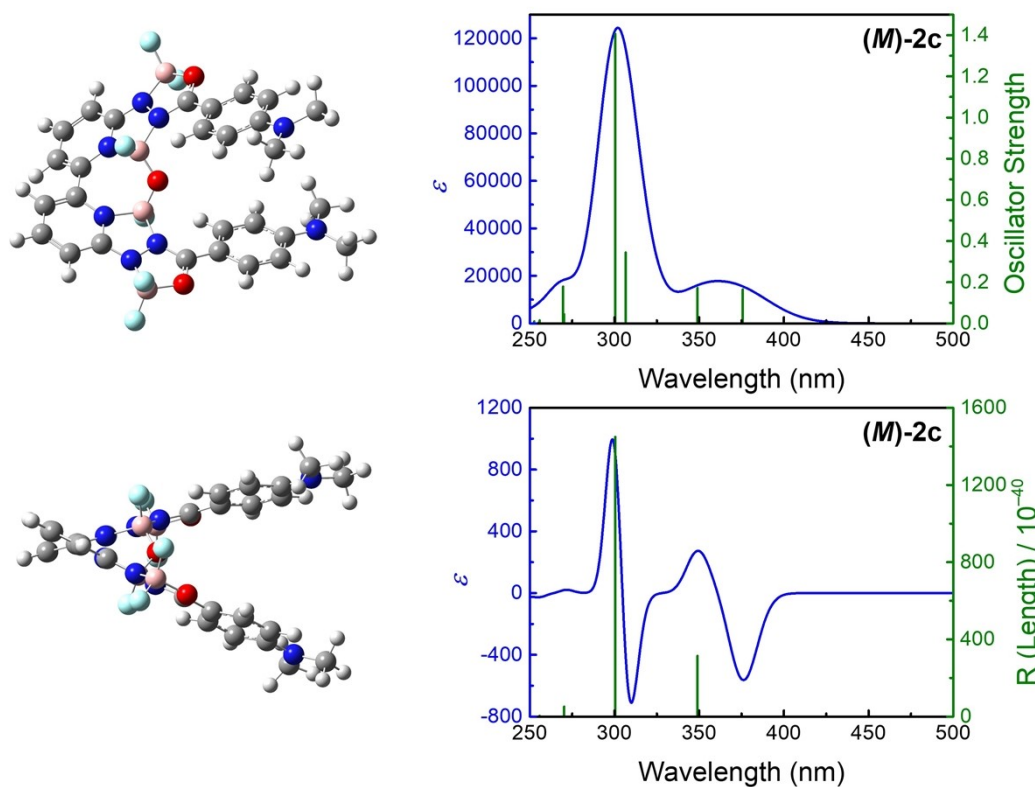

**Figure S53-2.** Calculated UV-vis and ECD spectra of **(M)-2c** by TD-DFT method [cam-B3LYP/6-31G(d,p)].



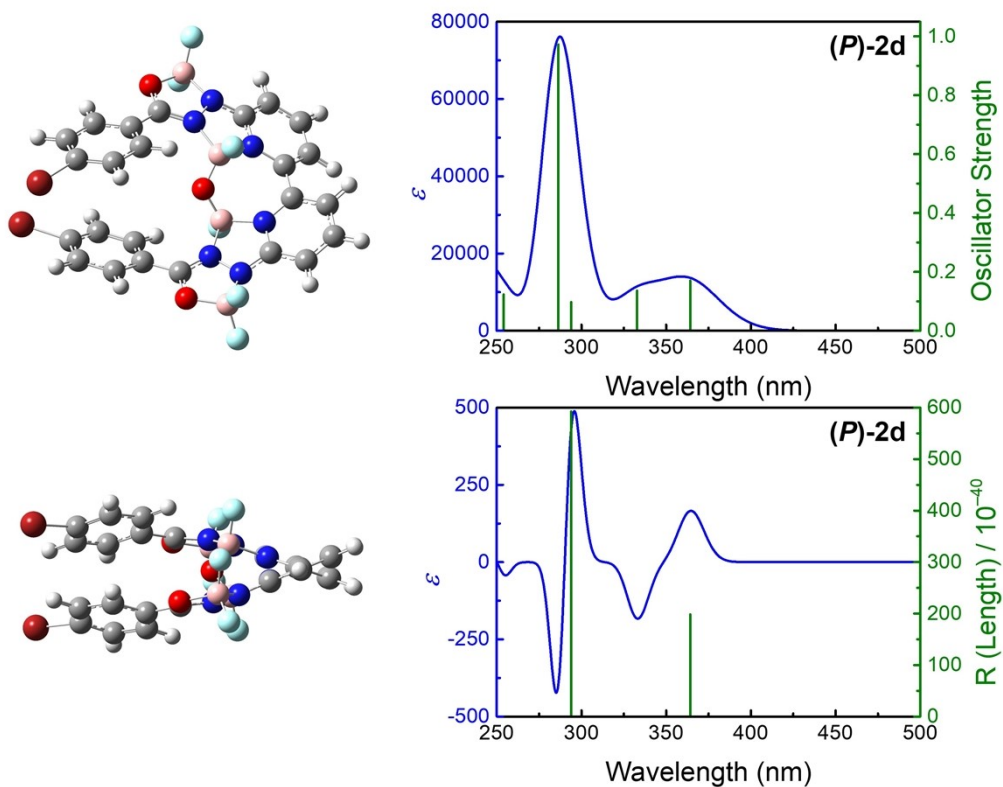

**Figure S54-1.** Calculated UV-vis and ECD spectra of **(P)-2d** by TD-DFT method [cam-B3LYP/6-31G(d,p)].

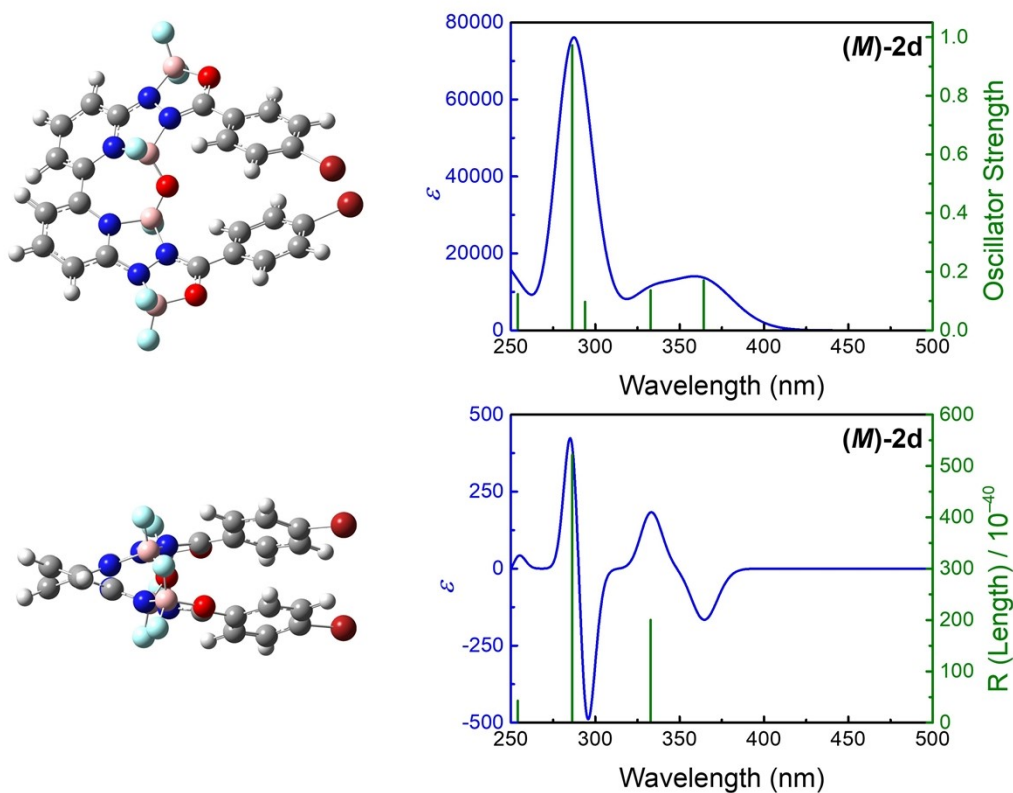

**Figure S54-2.** Calculated UV-vis and ECD spectra of **(M)-2d** by TD-DFT method [cam-B3LYP/6-31G(d,p)].

**Table S13.** Calculated photophysical property data of the ground state for **2a–2d** at the cam-B3LYP/6-31G(d,p) level.

|           | Electronic Transition          | TD//cam-B3LYP/6-31G(d,p) |           |                |                                                   |
|-----------|--------------------------------|--------------------------|-----------|----------------|---------------------------------------------------|
|           |                                | Energy/eV <sup>a</sup>   |           | f <sup>b</sup> | Major contributions                               |
| <b>2a</b> | S <sub>0</sub> →S <sub>1</sub> | 3.4216 eV                | 362.36 nm | 0.2226         | H-1->L+1 (11%), HOMO->LUMO (83%)                  |
|           | S <sub>0</sub> →S <sub>2</sub> | 3.7104 eV                | 334.15 nm | 0.0972         | H-1->LUMO (85%) HOMO->L+1 (9%), HOMO->L+3 (3%)    |
|           | S <sub>0</sub> →S <sub>3</sub> | 4.3042 eV                | 288.05 nm | 0.1468         | H-1->L+1 (46%), HOMO->L+2 (39%)                   |
|           | S <sub>0</sub> →S <sub>4</sub> | 4.3740 eV                | 283.46 nm | 0.8521         | H-1->L+2 (35%), HOMO->L+1 (55%)                   |
| <b>2b</b> | S <sub>0</sub> →S <sub>1</sub> | 3.4151 eV                | 363.05 nm | 0.2704         | H-2->LUMO (17%), H-1->L+1 (12%), HOMO->LUMO (62%) |
|           | S <sub>0</sub> →S <sub>2</sub> | 3.7092 eV                | 334.26 nm | 0.2236         | H-3->LUMO (20%), H-1->LUMO (57%), HOMO->L+1 (15%) |
|           | S <sub>0</sub> →S <sub>3</sub> | 4.0266 eV                | 307.91 nm | 0.3360         | H-2->LUMO (10%), H-1->L+1 (40%), HOMO->L+2 (36%)  |
|           | S <sub>0</sub> →S <sub>4</sub> | 4.0582 eV                | 305.51 nm | 0.4727         | H-3->LUMO (12%), H-1->L+2 (39%), HOMO->L+1 (35%)  |
| <b>2c</b> | S <sub>0</sub> →S <sub>1</sub> | 3.2996 eV                | 375.75 nm | 0.1653         | H-2->LUMO (24%), H-1->L+1 (11%), HOMO->LUMO (57%) |
|           | S <sub>0</sub> →S <sub>2</sub> | 3.5525 eV                | 349.00 nm | 0.1727         | H-3->LUMO (24%), H-1->LUMO (64%)                  |
|           | S <sub>0</sub> →S <sub>3</sub> | 4.0439 eV                | 306.59 nm | 0.3451         | H-1->L+1 (41%), HOMO->L+2 (33%)                   |
|           | S <sub>0</sub> →S <sub>4</sub> | 4.1263 eV                | 300.48 nm | 1.4066         | H-1->L+2 (36%), HOMO->L+1 (47%)                   |
| <b>2d</b> | S <sub>0</sub> →S <sub>1</sub> | 3.4040 eV                | 364.23 nm | 0.1709         | H-1->L+1 (12%), HOMO->LUMO (80%)                  |
|           | S <sub>0</sub> →S <sub>2</sub> | 3.7252 eV                | 332.82 nm | 0.1369         | H-1->LUMO (82%)                                   |
|           | S <sub>0</sub> →S <sub>3</sub> | 4.2186 eV                | 293.90 nm | 0.0979         | H-1->L+1 (46%), HOMO->LUMO (10%), HOMO->L+2 (36%) |
|           | S <sub>0</sub> →S <sub>4</sub> | 4.3293 eV                | 286.38 nm | 0.9724         | H-1->L+2 (34%), HOMO->L+1 (55%)                   |

<sup>a</sup>Only the selected low-lying excited states are presented. <sup>b</sup>Oscillator strength.

**Table S14.** Coordinates of electric transition dipole moment ( $\mu$ ) and magnetic transition dipole moments ( $m$ ) of the ground state of **2a–2d** at the cam-B3LYP/6-31G(d,p) level.

|           | Electronic Transition          | $\mu$ [a.u.] |         |         | $m$ [a.u.] |         |         |
|-----------|--------------------------------|--------------|---------|---------|------------|---------|---------|
|           |                                | x            | y       | z       | x          | y       | z       |
| <b>2a</b> | S <sub>0</sub> →S <sub>1</sub> | 1.6242       | 0.0002  | 0.1287  | -0.6809    | -0.0003 | -3.6047 |
|           | S <sub>0</sub> →S <sub>2</sub> | -0.0002      | 1.0342  | 0.0001  | 0.0002     | 0.7644  | -0.0005 |
|           | S <sub>0</sub> →S <sub>3</sub> | 0.0520       | 0.0043  | 1.1789  | 0.3273     | 0.0018  | -2.4114 |
|           | S <sub>0</sub> →S <sub>4</sub> | -0.0012      | 2.8198  | -0.0018 | -0.0007    | 0.9816  | 0.0031  |
| <b>2b</b> | S <sub>0</sub> →S <sub>1</sub> | -1.791       | -0.0001 | -0.1540 | 2.2284     | -0.0004 | -2.9776 |
|           | S <sub>0</sub> →S <sub>2</sub> | -0.0000      | 1.5688  | -0.0002 | 0.0003     | 1.0655  | -0.0004 |
|           | S <sub>0</sub> →S <sub>3</sub> | 0.6243       | 0.0027  | -1.7368 | 0.0505     | 0.0013  | 1.1673  |
|           | S <sub>0</sub> →S <sub>4</sub> | -0.0007      | 2.1804  | 0.0022  | 0.0001     | 1.0478  | -0.0016 |
| <b>2c</b> | S <sub>0</sub> →S <sub>1</sub> | -0.0005      | 1.3713  | -0.4058 | 0.0010     | -0.9436 | 4.0883  |
|           | S <sub>0</sub> →S <sub>2</sub> | 1.4087       | 0.0003  | -0.0000 | 0.9486     | 0.0008  | -0.0005 |
|           | S <sub>0</sub> →S <sub>3</sub> | -0.0024      | 0.3569  | 1.8318  | -0.0010    | -0.5586 | -2.7384 |
|           | S <sub>0</sub> →S <sub>4</sub> | -3.7302      | -0.0014 | -0.0011 | -1.6484    | -0.0008 | 0.0013  |
| <b>2d</b> | S <sub>0</sub> →S <sub>1</sub> | -0.0005      | -1.4258 | -0.1300 | -0.0003    | 0.1875  | 4.4231  |
|           | S <sub>0</sub> →S <sub>2</sub> | -1.2247      | 0.0003  | -0.0000 | -0.6937    | -0.0001 | -0.0012 |
|           | S <sub>0</sub> →S <sub>3</sub> | -0.0009      | 0.5518  | -0.8015 | -0.0003    | -0.9992 | 2.4490  |
|           | S <sub>0</sub> →S <sub>4</sub> | -3.0278      | -0.0002 | 0.0002  | -0.7315    | 0.0003  | -0.0007 |

**Table S15.** Calculated transition dipole moments ( $\mu$ ,  $m$ , and  $\theta$ ) and  $g_{\text{abs}}$  values of (*P*)-enantiomers of **2a–2d**.

|           | Electronic Transition          | Energy [nm] | $ \mu $ [ $10^{-20}$ esu cm] | $ m $ [ $10^{-20}$ erg G $^{-1}$ ] | $\theta$ [°] | $\cos \theta$ | $ g_{\text{abs}} ^{\text{cal}}$ |
|-----------|--------------------------------|-------------|------------------------------|------------------------------------|--------------|---------------|---------------------------------|
| <b>2a</b> | S <sub>0</sub> →S <sub>1</sub> | 362.36      | 414.12                       | 3.40                               | 105.23       | -0.26         | $8.63 \times 10^{-3}$           |
|           | S <sub>0</sub> →S <sub>2</sub> | 334.15      | 262.87                       | 0.71                               | 0.05         | 1.00          | $1.08 \times 10^{-2}$           |
|           | S <sub>0</sub> →S <sub>3</sub> | 288.05      | 299.94                       | 2.26                               | 169.74       | -0.98         | $2.96 \times 10^{-2}$           |
|           | S <sub>0</sub> →S <sub>4</sub> | 283.46      | 716.72                       | 0.91                               | 0.22         | 1.00          | $5.08 \times 10^{-3}$           |
| <b>2b</b> | S <sub>0</sub> →S <sub>1</sub> | 363.05      | 456.91                       | 3.45                               | 121.90       | -0.53         | $1.60 \times 10^{-2}$           |
|           | S <sub>0</sub> →S <sub>2</sub> | 334.26      | 398.75                       | 0.99                               | 0.021        | 1.00          | $9.91 \times 10^{-3}$           |
|           | S <sub>0</sub> →S <sub>3</sub> | 307.91      | 469.10                       | 1.08                               | 157.75       | -0.93         | $8.55 \times 10^{-3}$           |
|           | S <sub>0</sub> →S <sub>4</sub> | 305.51      | 554.20                       | 0.97                               | 0.15         | 1.00          | $7.01 \times 10^{-3}$           |
| <b>2c</b> | S <sub>0</sub> →S <sub>1</sub> | 375.75      | 363.49                       | 3.89                               | 119.48       | -0.49         | $2.11 \times 10^{-2}$           |
|           | S <sub>0</sub> →S <sub>2</sub> | 349.00      | 358.06                       | 0.88                               | 0.047        | 1.00          | $9.83 \times 10^{-3}$           |
|           | S <sub>0</sub> →S <sub>3</sub> | 306.59      | 474.35                       | 2.59                               | 179.49       | -1.00         | $2.19 \times 10^{-2}$           |
|           | S <sub>0</sub> →S <sub>4</sub> | 300.48      | 948.12                       | 1.53                               | 0.06         | 1.00          | $6.45 \times 10^{-3}$           |
| <b>2d</b> | S <sub>0</sub> →S <sub>1</sub> | 364.23      | 363.91                       | 4.11                               | 97.64        | -0.13         | $6.00 \times 10^{-3}$           |
|           | S <sub>0</sub> →S <sub>2</sub> | 332.82      | 311.29                       | 0.64                               | 0.10         | 1.00          | $8.27 \times 10^{-3}$           |
|           | S <sub>0</sub> →S <sub>3</sub> | 293.90      | 247.33                       | 2.45                               | 167.65       | -0.98         | $3.87 \times 10^{-2}$           |
|           | S <sub>0</sub> →S <sub>4</sub> | 286.38      | 769.59                       | 0.68                               | 0.065        | 1.00          | $3.53 \times 10^{-3}$           |

**Table S16.** Calculated photophysical property data of the S<sub>1</sub> excited state for all compounds at the cam-B3LYP/6-31G(d,p) level.

|           | Electronic Transition          | TD//cam-B3LYP/6-31G(d,p) |           |                |                                   |
|-----------|--------------------------------|--------------------------|-----------|----------------|-----------------------------------|
|           |                                | Energy/eV <sup>a</sup>   |           | f <sup>b</sup> | Major contributions               |
| <b>1a</b> | S <sub>1</sub> →S <sub>0</sub> | 2.9036 eV                | 427.00 nm | 0.4441         | HOMO->LUMO (91%)                  |
| <b>1b</b> | S <sub>1</sub> →S <sub>0</sub> | 2.7627 eV                | 448.78 nm | 0.4191         | HOMO->LUMO (83%)                  |
| <b>1c</b> | S <sub>1</sub> →S <sub>0</sub> | 2.6151 eV                | 474.10 nm | 0.3309         | H-2->LUMO (11%), HOMO->LUMO (80%) |
| <b>1d</b> | S <sub>1</sub> →S <sub>0</sub> | 2.9047 eV                | 426.84 nm | 0.4810         | HOMO->LUMO (90%)                  |
| <b>2a</b> | S <sub>1</sub> →S <sub>0</sub> | 2.4628 eV                | 503.43 nm | 0.1221         | HOMO->LUMO (94%)                  |
| <b>2b</b> | S <sub>1</sub> →S <sub>0</sub> | 2.4362 eV                | 508.93 nm | 0.1396         | HOMO->LUMO (87%)                  |
| <b>2c</b> | S <sub>1</sub> →S <sub>0</sub> | 2.2683 eV                | 546.59 nm | 0.0922         | H-2->LUMO (11%), HOMO->LUMO (85%) |
| <b>2d</b> | S <sub>1</sub> →S <sub>0</sub> | 2.4944 eV                | 497.06 nm | 0.1209         | HOMO->LUMO (93%)                  |

<sup>a</sup>Only the selected low-lying excited states are presented. <sup>b</sup>Oscillator strength.

**Table S17.** Coordinates of electric transition dipole moment ( $\mu$ ) and magnetic transition dipole moments ( $m$ ) of the excited state of (*P*)-enantiomers of **2a–2d** at the cam-B3LYP/6-31G(d,p) level.

|           | Electronic Transition          | $\mu$ [a.u.] |         |         | $m$ [a.u.] |         |         |
|-----------|--------------------------------|--------------|---------|---------|------------|---------|---------|
|           |                                | x            | y       | z       | x          | y       | z       |
| <b>2a</b> | S <sub>1</sub> →S <sub>0</sub> | -1.3640      | -0.4051 | -0.0204 | 0.3668     | -0.2160 | 2.2284  |
| <b>2b</b> | S <sub>1</sub> →S <sub>0</sub> | 1.4134       | -0.5007 | 0.3002  | -1.2166    | -0.4952 | 1.9163  |
| <b>2c</b> | S <sub>1</sub> →S <sub>0</sub> | -0.6225      | -1.1218 | -0.1115 | -0.2810    | 0.4822  | 2.2386  |
| <b>2d</b> | S <sub>1</sub> →S <sub>0</sub> | -0.5874      | -1.2776 | 0.0306  | -0.1178    | 0.1980  | -2.7374 |

**Table S18.** Calculated transition dipole moments ( $\mu$ ,  $m$ , and  $\theta$ ) and  $g_{lum}$  values of (*P*)-enantiomers of **2a–2d**.

|           | Electronic Transition          | Energy [nm] | $ \mu $ [ $10^{-20}$ esu cm] | $ m $ [ $10^{-20}$ erg G <sup>-1</sup> ] | $\theta$ [°] | $\cos \theta$ | $ g_{lum} ^{cal}$     |
|-----------|--------------------------------|-------------|------------------------------|------------------------------------------|--------------|---------------|-----------------------|
| <b>2a</b> | S <sub>1</sub> →S <sub>0</sub> | 503.43      | 361.70                       | 2.10                                     | 98.16        | -0.14         | $3.30 \times 10^{-3}$ |
| <b>2b</b> | S <sub>1</sub> →S <sub>0</sub> | 508.96      | 388.70                       | 2.15                                     | 104.61       | -0.25         | $5.59 \times 10^{-3}$ |
| <b>2c</b> | S <sub>1</sub> →S <sub>0</sub> | 546.59      | 327.32                       | 2.14                                     | 101.96       | -0.21         | $5.42 \times 10^{-3}$ |
| <b>2d</b> | S <sub>1</sub> →S <sub>0</sub> | 497.06      | 357.50                       | 2.55                                     | 93.97        | -0.069        | $1.97 \times 10^{-3}$ |

## HPLC measurements for bulk purity

HPLC was performed using LaboACE LC-5060 instrument with UV detector (UV-4ch 400 LA) by Japan Analytical Industry Co., Ltd. equipped with a JAIGEL-2HR with a chloroform (CHCl<sub>3</sub>) eluent.

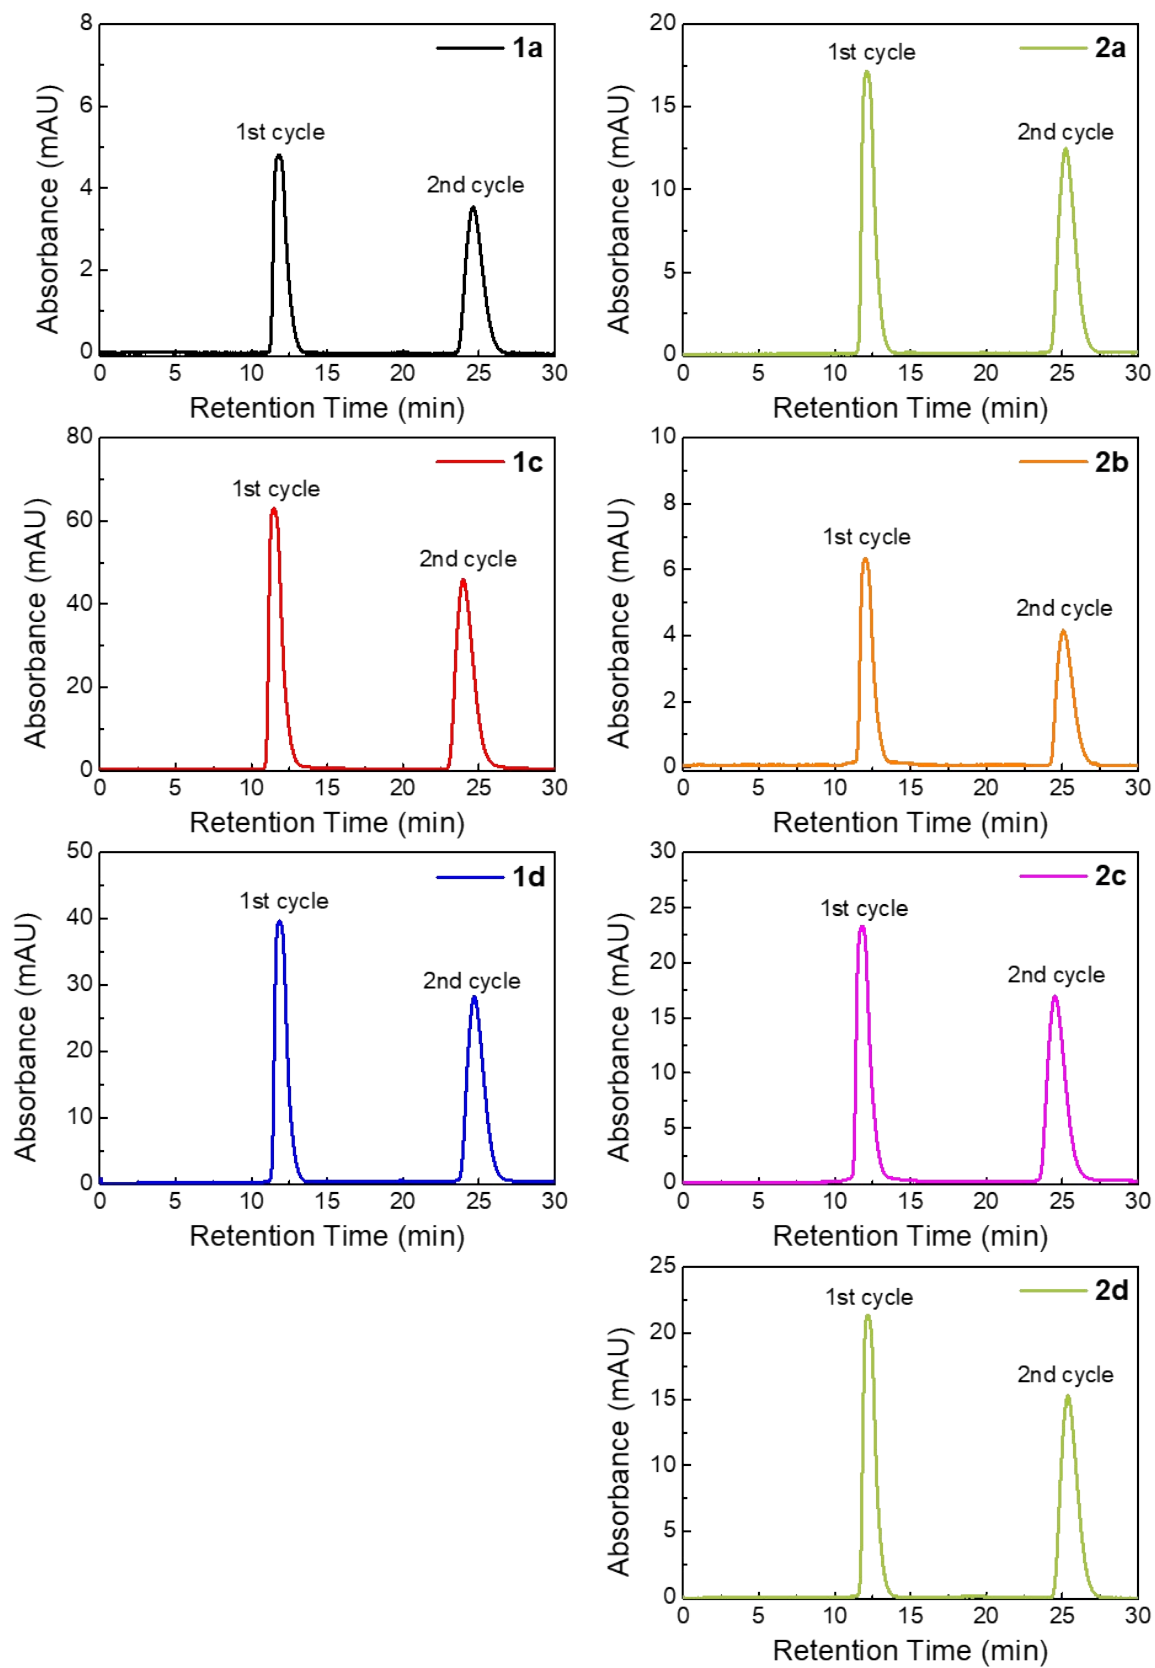

**Figure S55.** HPLC profiles of all compounds in  $\text{CHCl}_3$ . The results show that all synthesized complexes are pure.

**The ground states of 1a optimized at B3LYP/6-31G(d,p) level.**

|   |              |              |              |
|---|--------------|--------------|--------------|
| C | 0.377021162  | -0.643323692 | -1.757350309 |
| N | 1.611559839  | -0.663130156 | -1.168352202 |
| C | 2.347600000  | -1.814628825 | -1.139507560 |
| C | 1.896843337  | -2.992252075 | -1.776504890 |
| C | 0.668031608  | -2.952226616 | -2.388582698 |
| C | -0.112612758 | -1.773140429 | -2.376234458 |
| C | -0.377027793 | 0.643366508  | -1.757329782 |
| N | -1.611556188 | 0.663157875  | -1.168309958 |
| C | -2.347598830 | 1.814653426  | -1.139428374 |
| C | -1.896856376 | 2.992290652  | -1.776409956 |
| C | -0.668055262 | 2.952281089  | -2.388510185 |
| C | 0.112592225  | 1.773196575  | -2.376200448 |
| N | 3.476333082  | -1.689462244 | -0.438194811 |
| N | 3.590301012  | -0.400043013 | 0.082477988  |
| B | 2.384053634  | 0.509790424  | -0.399295873 |
| C | 4.784642723  | -0.284754707 | 0.647319303  |
| O | 5.523113490  | -1.352678328 | 0.568804682  |
| B | 4.819102793  | -2.486444484 | -0.189092802 |
| N | -3.476323578 | 1.689467314  | -0.438105853 |
| N | -3.590282327 | 0.400037120  | 0.082543300  |
| B | -2.384030535 | -0.509778344 | -0.399260570 |
| C | -4.784623900 | 0.284732236  | 0.647385228  |
| O | -5.523098408 | 1.352654494  | 0.568891308  |
| B | -4.819093046 | 2.486441081  | -0.188978936 |
| F | 2.830072192  | 1.484749496  | -1.260622347 |
| F | 1.625354897  | 1.005710591  | 0.630818800  |
| F | 4.638652933  | -3.572785828 | 0.615310694  |
| F | 5.466025743  | -2.771347651 | -1.358403020 |
| C | 5.293326736  | 0.910625959  | 1.319840064  |
| C | 4.443914764  | 1.942518287  | 1.753644020  |
| C | 4.986212084  | 3.056960340  | 2.387059541  |
| C | 6.364316294  | 3.150948717  | 2.594315017  |
| C | 7.208254044  | 2.120284504  | 2.173451498  |
| C | 6.678251385  | 0.999940013  | 1.542268973  |
| F | -2.830046521 | -1.484729822 | -1.260597068 |
| F | -1.625304874 | -1.005704325 | 0.630831786  |
| F | -4.638642355 | 3.572762205  | 0.615451630  |
| F | -5.466020451 | 2.771372374  | -1.358279743 |
| C | -5.293323985 | -0.910660863 | 1.319874667  |
| C | -4.443931570 | -1.942565341 | 1.753689932  |

|   |              |              |              |
|---|--------------|--------------|--------------|
| C | -4.986254815 | -3.057011421 | 2.387076559  |
| C | -6.364365031 | -3.150992898 | 2.594293776  |
| C | -7.208283202 | -2.120316085 | 2.173422991  |
| C | -6.678254560 | -0.999967345 | 1.542269984  |
| H | 2.515212607  | -3.880553077 | -1.748382072 |
| H | 0.283171442  | -3.837946641 | -2.883529466 |
| H | -1.095437192 | -1.753504868 | -2.823972847 |
| H | -2.515228461 | 3.880588818  | -1.748259816 |
| H | -0.283206614 | 3.838012010  | -2.883446422 |
| H | 1.095408240  | 1.753572364  | -2.823957644 |
| H | 3.371801186  | 1.862231144  | 1.621917499  |
| H | 4.328797048  | 3.850790170  | 2.727106264  |
| H | 6.779598988  | 4.023645918  | 3.089507307  |
| H | 8.278834971  | 2.189515652  | 2.338311351  |
| H | 7.319646014  | 0.190833664  | 1.212652418  |
| H | -3.371813992 | -1.862283713 | 1.622002141  |
| H | -4.328854723 | -3.850849422 | 2.727133104  |
| H | -6.779667517 | -4.023692930 | 3.089464534  |
| H | -8.278868944 | -2.189540433 | 2.338254745  |
| H | -7.319634478 | -0.190851055 | 1.212648682  |

**The ground states of 1b optimized at B3LYP/6-31G(d,p) level.**

|   |              |              |              |
|---|--------------|--------------|--------------|
| C | -2.130597676 | -2.058313281 | 1.242440790  |
| N | -1.527499133 | -0.832969986 | 1.281548788  |
| C | -0.305799524 | -0.680270149 | 1.877386691  |
| C | 0.299936284  | -1.750534305 | 2.499439479  |
| C | -0.346543506 | -3.007946334 | 2.503964802  |
| C | -1.558178232 | -3.180944638 | 1.880470349  |
| C | 0.305785263  | 0.680105549  | 1.877435862  |
| N | 1.527473532  | 0.832852995  | 1.281589725  |
| C | 2.130583113  | 2.058193507  | 1.242588986  |
| C | 1.558186212  | 3.180767802  | 1.880741431  |
| C | 0.346562480  | 3.007718873  | 2.504241842  |
| C | -0.299928564 | 1.750312373  | 2.499609668  |
| N | 3.259929814  | 2.058188850  | 0.528717193  |
| N | 3.528888601  | 0.778846938  | 0.039874466  |
| B | 2.407983902  | -0.248889497 | 0.489015268  |
| C | 4.753222718  | 0.773702954  | -0.472725496 |
| O | 5.371719213  | 1.915497348  | -0.386561123 |
| B | 4.529867617  | 2.976468077  | 0.337478029  |
| B | -2.407998513 | 0.248825579  | 0.489038273  |



|   |              |              |              |
|---|--------------|--------------|--------------|
| N | -3.528898036 | -0.778877276 | 0.039816150  |
| N | -3.259938069 | -2.058262856 | 0.528554599  |
| B | -4.529971261 | -2.976443576 | 0.337441281  |
| O | -5.371722705 | -1.915492295 | -0.386732248 |
| C | -4.753216871 | -0.773695884 | -0.472810566 |
| C | -5.361441479 | 0.393003975  | -1.119251867 |
| C | 5.361479474  | -0.392952077 | -1.119216793 |
| C | 4.527568871  | -1.254845027 | -1.820059205 |
| C | 5.045130616  | -2.375437332 | -2.497368909 |
| C | 6.395961358  | -2.630299800 | -2.469719128 |
| C | 7.287421660  | -1.785188456 | -1.758483632 |
| C | 6.781507519  | -0.634911975 | -1.063160645 |
| C | 8.678392370  | -2.070877457 | -1.719799484 |
| C | 9.544842008  | -1.268761818 | -1.016177637 |
| C | 9.047278867  | -0.145608214 | -0.317657347 |
| C | 7.705287427  | 0.166520176  | -0.337652269 |
| C | -4.527503089 | 1.254905708  | -1.820048918 |
| C | -5.045034173 | 2.375541712  | -2.497310959 |
| C | -6.395858433 | 2.630437111  | -2.469653589 |
| C | -7.287344135 | 1.785320449  | -1.758455236 |
| C | -6.781462486 | 0.634999284  | -1.063183262 |
| C | -8.678306802 | 2.071046418  | -1.719756949 |
| C | -9.544777131 | 1.268923862  | -1.016168911 |
| C | -9.047244840 | 0.145726621  | -0.317696239 |
| C | -7.705262450 | -0.166438739 | -0.337705948 |
| F | -2.934821092 | 1.204522076  | 1.323214665  |
| F | -1.693421967 | 0.774141457  | -0.558113486 |
| F | -4.290405201 | -4.045514416 | -0.473201018 |
| F | -5.100310377 | -3.312604064 | 1.534857788  |
| F | 2.934796814  | -1.204640701 | 1.323128753  |
| F | 1.693407515  | -0.774128799 | -0.558177125 |
| F | 4.290202611  | 4.045385551  | -0.473341995 |
| F | 5.100156932  | 3.312876945  | 1.534841658  |
| H | 1.271440402  | -1.624433891 | 2.954494548  |
| H | 0.128737038  | -3.847205973 | 3.001280119  |
| H | -2.074979682 | -4.131723756 | 1.846074537  |
| H | 2.075011199  | 4.131537999  | 1.846452354  |
| H | -0.128696249 | 3.846932161  | 3.001656285  |
| H | -1.271420843 | 1.624172244  | 2.954677828  |
| H | 3.463297674  | -1.058056815 | -1.860364572 |
| H | 4.370356591  | -3.025191850 | -3.044755195 |
| H | 6.804489210  | -3.489767072 | -2.994604553 |
| H | 9.042460496  | -2.943322563 | -2.255482655 |
| H | 10.606145876 | -1.496295779 | -0.991356404 |

|   |               |              |              |
|---|---------------|--------------|--------------|
| H | 9.731445411   | 0.483351815  | 0.243909608  |
| H | 7.351986100   | 1.036421371  | 0.198431534  |
| H | -3.463235591  | 1.058092767  | -1.860345908 |
| H | -4.370242670  | 3.025304147  | -3.044666393 |
| H | -6.804361467  | 3.489939250  | -2.994501337 |
| H | -9.042352173  | 2.943525275  | -2.255400723 |
| H | -10.606074490 | 1.496486743  | -0.991335898 |
| H | -9.731428954  | -0.483236821 | 0.243845394  |
| H | -7.351983930  | -1.036370946 | 0.198343058  |

**The ground states of 1c optimized at B3LYP/6-31G(d,p) level.**

|   |              |              |              |
|---|--------------|--------------|--------------|
| C | -1.127425872 | -3.184786015 | -2.660413981 |
| C | 0.092307661  | -2.819631466 | -3.173526372 |
| C | 0.559424952  | -1.489476737 | -3.060854116 |
| C | -0.225159489 | -0.546401773 | -2.432949331 |
| N | -1.452366945 | -0.892093790 | -1.935066191 |
| C | -1.892173549 | -2.185631385 | -2.016473850 |
| C | 0.196470374  | 0.880083965  | -2.330508469 |
| N | 1.368451662  | 1.161287908  | -1.682151465 |
| C | 1.802124927  | 2.454063048  | -1.564534587 |
| C | 1.103538906  | 3.522909417  | -2.171760618 |
| C | -0.055303422 | 3.223582475  | -2.843590538 |
| C | -0.528691933 | 1.892625979  | -2.920166275 |
| N | 2.897045018  | 2.564510855  | -0.814055529 |
| N | 3.296678332  | 1.312349576  | -0.340979670 |
| B | 2.383908290  | 0.170379495  | -0.938403293 |
| C | 4.462186201  | 1.456492135  | 0.286676098  |
| O | 4.918958821  | 2.679393807  | 0.285124387  |
| B | 3.997641852  | 3.641484105  | -0.462019521 |
| N | -3.072321106 | -2.370363257 | -1.423445312 |
| N | -3.494452270 | -1.190493920 | -0.805309955 |
| B | -2.503585223 | -0.001985100 | -1.112838847 |
| C | -4.508915722 | -1.480711948 | 0.004897572  |
| O | -4.823094266 | -2.747057823 | 0.033666522  |
| B | -3.938853270 | -3.581582135 | -0.892317368 |
| C | -5.244524471 | -0.522208475 | 0.803097343  |
| C | 5.207421769  | 0.400649093  | 0.940493294  |
| C | 4.654556847  | -0.860784055 | 1.234181921  |
| C | 5.409122837  | -1.836759785 | 1.858239962  |
| C | 6.761267283  | -1.602965149 | 2.221542290  |
| C | 7.303570509  | -0.322390525 | 1.936929974  |
| C | 6.541282744  | 0.649261818  | 1.316897569  |

|   |              |              |              |
|---|--------------|--------------|--------------|
| C | -5.187170886 | 0.865377002  | 0.571720946  |
| C | -5.898993911 | 1.745535136  | 1.365236540  |
| C | -6.706626663 | 1.282363499  | 2.436846981  |
| C | -6.774357699 | -0.119778495 | 2.647760157  |
| C | -6.063685936 | -0.993129274 | 1.846368474  |
| N | -7.402745416 | 2.157680931  | 3.234125194  |
| C | -7.315353540 | 3.591290627  | 2.999622228  |
| C | -8.253232159 | 1.656982551  | 4.303391692  |
| N | 7.513974294  | -2.576579874 | 2.831427584  |
| C | 8.883135439  | -2.297056603 | 3.237265491  |
| C | 6.929576393  | -3.875660077 | 3.129933888  |
| F | -4.685587394 | -4.163195621 | -1.877778726 |
| F | -3.176494897 | -4.476915172 | -0.191548492 |
| F | -1.940445648 | 0.544937777  | 0.004956001  |
| F | -3.110282663 | 0.943775923  | -1.923716667 |
| F | 1.737342911  | -0.578824733 | 0.014080015  |
| F | 3.093751552  | -0.602018794 | -1.832947846 |
| F | 4.603096080  | 4.136559717  | -1.585500696 |
| F | 3.524526535  | 4.616867611  | 0.369953769  |
| H | -1.510946559 | -4.196083849 | -2.707574162 |
| H | 0.713840424  | -3.559997894 | -3.666837505 |
| H | 1.533680516  | -1.209742721 | -3.433847605 |
| H | 1.488493240  | 4.530129215  | -2.073953289 |
| H | -0.624083903 | 4.016888891  | -3.317918401 |
| H | -1.460886079 | 1.662566948  | -3.414396129 |
| H | 3.617015023  | -1.069519408 | 1.002756242  |
| H | 4.941140349  | -2.787492854 | 2.077997378  |
| H | 8.326611421  | -0.089615832 | 2.202639581  |
| H | 6.973092861  | 1.621427592  | 1.107717088  |
| H | -4.611806300 | 1.255661617  | -0.259196588 |
| H | -5.837664914 | 2.803394419  | 1.145467345  |
| H | -7.384474196 | -0.524569948 | 3.444779571  |
| H | -6.126487475 | -2.060957432 | 2.023504367  |
| H | -7.705028659 | 3.870257553  | 2.011613542  |
| H | -7.904474453 | 4.113639515  | 3.753283097  |
| H | -6.281042951 | 3.949883155  | 3.071760866  |
| H | -7.679706311 | 1.087739409  | 5.046151769  |
| H | -8.719809485 | 2.499391959  | 4.813793336  |
| H | -9.052164919 | 1.008958543  | 3.920129841  |
| H | 9.512826891  | -2.027950519 | 2.379787878  |
| H | 8.935043335  | -1.479279550 | 3.968086508  |
| H | 9.308720315  | -3.188176644 | 3.698417692  |
| H | 6.089535398  | -3.797241718 | 3.832820697  |
| H | 6.568191460  | -4.373275538 | 2.221568452  |

|   |             |              |             |
|---|-------------|--------------|-------------|
| H | 7.688677400 | -4.514043867 | 3.581781836 |
|---|-------------|--------------|-------------|

**The ground states of 1d optimized at B3LYP/6-31G(d,p) level.**

|   |              |              |              |
|---|--------------|--------------|--------------|
| C | 0.158062331  | -0.728745103 | -2.411545747 |
| N | 1.322416036  | -1.131384927 | -1.817091764 |
| C | 1.664873664  | -2.454323345 | -1.787385976 |
| C | 0.873209624  | -3.433602342 | -2.427186972 |
| C | -0.280168260 | -3.013877136 | -3.043820440 |
| C | -0.655930700 | -1.650543692 | -3.033389182 |
| C | -0.158072577 | 0.728739382  | -2.411548832 |
| N | -1.322430191 | 1.131383795  | -1.817104803 |
| C | -1.664881104 | 2.454324361  | -1.787400475 |
| C | -0.873207042 | 3.433600352  | -2.427193618 |
| C | 0.280174616  | 3.013870463  | -3.043816715 |
| C | 0.655931314  | 1.650535516  | -3.033381863 |
| N | 2.774810889  | -2.685118806 | -1.081922645 |
| N | 3.277737485  | -1.495082550 | -0.556763222 |
| B | 2.416360339  | -0.255872498 | -1.045173195 |
| C | 4.441783174  | -1.756046829 | 0.021389231  |
| O | 4.814833074  | -2.999608041 | -0.051560047 |
| B | 3.801605462  | -3.860425836 | -0.822452667 |
| N | -2.774819091 | 2.685125664  | -1.081940156 |
| N | -3.277753551 | 1.495091202  | -0.556785109 |
| B | -2.416386475 | 0.255876065  | -1.045195717 |
| C | -4.441796160 | 1.756060275  | 0.021369324  |
| O | -4.814839794 | 2.999623815  | -0.051575030 |
| B | -3.801609632 | 3.860436780  | -0.822470575 |
| F | 3.148163409  | 0.530801479  | -1.903055195 |
| F | 1.847608807  | 0.452976305  | -0.016669968 |
| F | 3.284254277  | -4.836438206 | -0.024102052 |
| F | 4.342863473  | -4.329213298 | -1.985190595 |
| C | 5.287284384  | -0.777463621 | 0.703312728  |
| C | 4.802395413  | 0.473537733  | 1.120265977  |
| C | 5.650215621  | 1.368008037  | 1.764453752  |
| C | 6.979572689  | 1.010553102  | 1.992416600  |
| C | 7.474970279  | -0.232276261 | 1.595921990  |
| C | 6.624894549  | -1.126115063 | 0.955838995  |
| F | -3.148196011 | -0.530785657 | -1.903083384 |
| F | -1.847652041 | -0.452982203 | -0.016689743 |
| F | -3.284253949 | 4.836448599  | -0.024122246 |
| F | -4.342867347 | 4.329224549  | -1.985208619 |
| C | -5.287290380 | 0.777474221  | 0.703295778  |

|    |              |              |              |
|----|--------------|--------------|--------------|
| C  | -4.802392873 | -0.473530388 | 1.120228262  |
| C  | -5.650201809 | -1.368008995 | 1.764419112  |
| C  | -6.979556338 | -1.010558579 | 1.992404689  |
| C  | -7.474962500 | 0.232273481  | 1.595928589  |
| C  | -6.624898041 | 1.126120640  | 0.955842250  |
| Br | 8.138633216  | 2.239763757  | 2.872378711  |
| Br | -8.138602312 | -2.239781088 | 2.872369239  |
| H  | 1.184517048  | -4.470176524 | -2.397661379 |
| H  | -0.919200826 | -3.736408909 | -3.540922229 |
| H  | -1.581866248 | -1.326651766 | -3.485861712 |
| H  | -1.184509052 | 4.470176169  | -2.397668438 |
| H  | 0.919215818  | 3.736399929  | -3.540910767 |
| H  | 1.581871408  | 1.326640209  | -3.485842974 |
| H  | 3.763269370  | 0.740143920  | 0.969746355  |
| H  | 5.281194935  | 2.331870888  | 2.094262916  |
| H  | 8.508992255  | -0.493906347 | 1.786720477  |
| H  | 6.988423285  | -2.097813542 | 0.642343762  |
| H  | -3.763268560 | -0.740133310 | 0.969686214  |
| H  | -5.281174805 | -2.331875037 | 2.094211867  |
| H  | -8.508982624 | 0.493899067  | 1.786743507  |
| H  | -6.988433180 | 2.097821120  | 0.642360986  |

**The ground states of (P)-2a optimized at B3LYP/6-31G(d,p) level.**

|   |              |              |              |
|---|--------------|--------------|--------------|
| F | -4.830385376 | -0.010546245 | 1.893877103  |
| F | -5.758309282 | -0.665554037 | -0.088697960 |
| F | -0.790290550 | -1.000924399 | -2.015925088 |
| F | 0.787759225  | -0.998800451 | 2.013381905  |
| F | 5.758617792  | -0.662326775 | 0.092484963  |
| F | 4.833422287  | -0.007416850 | -1.891387985 |
| O | -4.240105184 | 1.179509058  | -0.097945578 |
| O | 0.000485841  | -0.078298109 | -0.002580350 |
| O | 4.239804331  | 1.182232992  | 0.099705962  |
| N | -2.452068881 | -0.065427742 | -0.468579023 |
| N | -3.336228151 | -0.923096719 | 0.186967662  |
| N | -1.452560068 | -2.140528523 | 0.047080364  |
| N | 1.454381379  | -2.139521377 | -0.047630515 |
| N | 3.337064394  | -0.920603188 | -0.186744833 |
| N | 2.451860597  | -0.063483237 | 0.468151908  |
| C | -3.035256505 | 3.533718254  | -1.018509996 |
| H | -3.882333727 | 3.600805445  | -0.345607047 |
| C | -2.513201405 | 4.670885321  | -1.626114208 |
| H | -2.956201467 | 5.641118958  | -1.424263293 |

|   |              |              |              |
|---|--------------|--------------|--------------|
| C | -1.424358254 | 4.562388956  | -2.494458757 |
| C | -0.861394742 | 3.311861639  | -2.759291718 |
| H | -0.024819069 | 3.225281468  | -3.445351103 |
| C | -1.372596739 | 2.167034816  | -2.154831364 |
| H | -0.952525912 | 1.196746059  | -2.389956341 |
| C | -2.459878092 | 2.276994192  | -1.271695132 |
| C | -3.042270358 | 1.110170418  | -0.607879014 |
| C | -2.745959981 | -2.083208361 | 0.476467538  |
| C | -3.349695643 | -3.182191459 | 1.131923598  |
| H | -4.376931820 | -3.103683955 | 1.464749486  |
| C | -2.587541014 | -4.310876153 | 1.314258996  |
| H | -3.014488045 | -5.172233551 | 1.817819785  |
| C | -1.247228278 | -4.363316031 | 0.867128250  |
| H | -0.636005319 | -5.238078356 | 1.045422454  |
| C | -0.700039528 | -3.260900526 | 0.239414457  |
| C | 0.702746111  | -3.260438914 | -0.240057361 |
| C | 1.251027231  | -4.362573574 | -0.867325226 |
| H | 0.640553423  | -5.237838676 | -1.045724101 |
| C | 2.591534698  | -4.309220537 | -1.313757479 |
| H | 3.019366064  | -5.170353352 | -1.816953104 |
| C | 3.352840575  | -3.179984488 | -1.131173447 |
| H | 4.380195753  | -3.100849327 | -1.463483778 |
| C | 2.747968770  | -2.081311515 | -0.476252660 |
| C | 3.041441476  | 1.112338425  | 0.608311367  |
| C | 2.457851100  | 2.278880211  | 1.271567579  |
| C | 1.369412733  | 2.168522518  | 2.153225375  |
| H | 0.949350144  | 1.198068494  | 2.387699819  |
| C | 0.857075576  | 3.313143571  | 2.757118139  |
| H | 0.019576601  | 3.226244512  | 3.442010968  |
| C | 1.420040755  | 4.563858471  | 2.493187414  |
| C | 2.510022860  | 4.672757343  | 1.626322053  |
| H | 2.953036982  | 5.643132848  | 1.425178818  |
| C | 3.033208716  | 3.535806334  | 1.019290353  |
| H | 3.881126224  | 3.603213361  | 0.347487288  |
| B | -4.666528223 | -0.143186117 | 0.543060219  |
| B | -1.025422803 | -0.749836939 | -0.671753697 |
| B | 1.025331430  | -0.748554414 | 0.669481236  |
| B | 4.667591319  | -0.140241947 | -0.540844485 |
| H | 1.014328729  | 5.451991115  | 2.968634868  |
| H | -1.019539447 | 5.450691456  | -2.970349233 |

The ground states of (*P*)-2b optimized at B3LYP/6-31G(d,p) level.

|   |              |              |              |
|---|--------------|--------------|--------------|
| F | 3.934020157  | 0.131330301  | 3.677555520  |
| F | 5.131861481  | 1.514065482  | 2.307108685  |
| F | 1.607343513  | 1.336059559  | -1.436379611 |
| F | -1.607195100 | 1.336482170  | 1.436426226  |
| F | -3.933477946 | 0.131120606  | -3.677501380 |
| F | -5.131579768 | 1.514125554  | -2.307557342 |
| O | 4.274327399  | -0.544091152 | 1.419659250  |
| O | 0.000037051  | 0.385329789  | 0.000124123  |
| O | -4.274239984 | -0.543875925 | -1.419547742 |
| N | 2.415979675  | 0.390472425  | 0.675200017  |
| N | 2.776409285  | 1.172126374  | 1.778674485  |
| N | 1.242864873  | 2.437780344  | 0.730074259  |
| N | -1.242511313 | 2.437826276  | -0.730178639 |
| N | -2.776240239 | 1.172246952  | -1.778586250 |
| N | -2.415895144 | 0.390669335  | -0.675038137 |
| C | 2.021804771  | -1.973919358 | -0.987468274 |
| C | 1.885165273  | -2.964988900 | -1.977512419 |
| C | 3.003934356  | -3.566962116 | -2.502874696 |
| C | 4.304877553  | -3.198130457 | -2.071824700 |
| C | 4.467119387  | -2.188876337 | -1.062160706 |
| C | 3.272238270  | -1.585661582 | -0.524309267 |
| C | 3.324364166  | -0.564340633 | 0.526861302  |
| C | 2.148117772  | 2.351380569  | 1.743349946  |
| C | 2.367620632  | 3.437989497  | 2.621442331  |
| C | 1.629356303  | 4.579969690  | 2.417981182  |
| C | 0.676284370  | 4.654549778  | 1.376733773  |
| C | 0.497066370  | 3.563392212  | 0.549057507  |
| C | -0.496577574 | 3.563375648  | -0.549313121 |
| C | -0.675652067 | 4.654437989  | -1.377143748 |
| C | -1.628726365 | 4.579832416  | -2.418389427 |
| C | -2.367133085 | 3.437918962  | -2.621694785 |
| C | -2.147769399 | 2.351401582  | -1.743450257 |
| C | -3.324329960 | -0.564101164 | -0.526692649 |
| C | -3.272427007 | -1.585298127 | 0.524605149  |
| C | -4.467457103 | -2.188389997 | 1.062239532  |
| C | -4.305517852 | -3.197542266 | 2.072049109  |
| C | -3.004696736 | -3.566402770 | 2.503445091  |
| C | -1.885770065 | -2.964559361 | 1.978264565  |
| C | -2.022119457 | -1.973592035 | 0.988074769  |
| B | 4.107569598  | 0.610137304  | 2.412147479  |
| B | 1.222744617  | 1.067443932  | -0.141558317 |
| B | -1.222591187 | 1.067619698  | 0.141657288  |
| B | -4.107277059 | 0.610169986  | -2.412215891 |
| C | 5.452723602  | -3.813136954 | -2.639595344 |

|   |              |              |              |
|---|--------------|--------------|--------------|
| C | 6.717895915  | -3.447669418 | -2.246461871 |
| C | 6.881319820  | -2.443133739 | -1.266358056 |
| C | 5.791437153  | -1.829158847 | -0.688295990 |
| C | -5.791652529 | -1.828646550 | 0.687983897  |
| C | -6.881716756 | -2.442490990 | 1.265841056  |
| C | -6.718595805 | -3.446916844 | 2.246110016  |
| C | -5.453542134 | -3.812415156 | 2.639604287  |
| H | 1.132157129  | -1.515682045 | -0.572776168 |
| H | 0.893584303  | -3.250294824 | -2.313070856 |
| H | 2.908754403  | -4.337094033 | -3.263731450 |
| H | 3.108031638  | 3.347149581  | 3.405852414  |
| H | 1.772226884  | 5.435058713  | 3.070850539  |
| H | 0.062338331  | 5.535905927  | 1.245290552  |
| H | -0.061595185 | 5.535734791  | -1.245820724 |
| H | -1.771484554 | 5.434848842  | -3.071378367 |
| H | -3.107556538 | 3.347062240  | -3.406091401 |
| H | -2.909739382 | -4.336457936 | 3.264407389  |
| H | -0.894282727 | -3.249890326 | 2.314078701  |
| H | -1.132347823 | -1.515463240 | 0.573532479  |
| H | 5.307536151  | -4.576809242 | -3.398831296 |
| H | 7.588930346  | -3.922313539 | -2.687867427 |
| H | 7.880998139  | -2.148399834 | -0.961501287 |
| H | 5.945292581  | -1.069156731 | 0.064486087  |
| H | -5.945263423 | -1.068732431 | -0.064942702 |
| H | -7.881300405 | -2.147740405 | 0.960690026  |
| H | -7.589768933 | -3.921462437 | 2.687347542  |
| H | -5.308588420 | -4.576012862 | 3.398959880  |

**The ground states of (P)-2c optimized at B3LYP/6-31G(d,p) level.**

|   |              |              |              |
|---|--------------|--------------|--------------|
| N | 4.807032075  | 1.331932717  | -3.220576071 |
| N | 4.808716742  | -1.328872432 | 3.220361437  |
| F | -0.789647440 | -4.592957023 | -2.376109392 |
| F | -1.523836661 | -5.730236482 | -0.536501671 |
| F | -1.844869527 | -0.977887091 | 1.923525671  |
| F | -1.846319266 | 0.976294347  | -1.923448866 |
| F | -1.527837468 | 5.729689577  | 0.535121809  |
| F | -0.794337475 | 4.593321700  | 2.375566335  |
| O | 0.331620243  | -4.244304867 | -0.293584978 |
| O | -0.913081902 | 0.000007815  | 0.000119004  |
| O | 0.328320582  | 4.244581415  | 0.293664926  |
| N | -0.906924337 | -2.486718772 | 0.227409383  |
| N | -1.751491793 | -3.290429029 | -0.542202116 |
| N | -2.975386968 | -1.439226500 | -0.200182952 |



|   |              |              |              |
|---|--------------|--------------|--------------|
| N | -2.976688173 | 1.437261284  | 0.200443122  |
| N | -1.754465171 | 3.289733923  | 0.541574269  |
| N | -0.909360368 | 2.486594003  | -0.228055822 |
| C | 2.649144315  | -3.247800563 | 0.915451711  |
| H | 2.724663195  | -4.069438202 | 0.212100206  |
| C | 3.770603925  | -2.830326832 | 1.608148493  |
| H | 4.710127417  | -3.337905484 | 1.431098327  |
| C | 3.696886915  | -1.758243026 | 2.534732246  |
| C | 2.430167483  | -1.150592738 | 2.732866257  |
| H | 2.315121725  | -0.348206792 | 3.449845766  |
| C | 1.314175132  | -1.571605824 | 2.033620209  |
| H | 0.360228654  | -1.103401897 | 2.242672835  |
| C | 1.401824077  | -2.622958905 | 1.101060843  |
| C | 0.262739429  | -3.103808666 | 0.344182716  |
| C | -2.910776696 | -2.677732777 | -0.771174212 |
| C | -4.007192998 | -3.207138049 | -1.494307919 |
| C | -5.137185348 | -2.432724695 | -1.594496243 |
| H | -5.996144239 | -2.804146899 | -2.144298313 |
| C | -5.195522880 | -1.149294550 | -1.002014018 |
| H | -6.071047480 | -0.523683755 | -1.114814715 |
| C | -4.096440990 | -0.672754049 | -0.314343917 |
| C | -4.096947365 | 0.669717450  | 0.315164305  |
| C | -5.196174620 | 1.145250726  | 1.003299723  |
| H | -6.071049755 | 0.518811741  | 1.116543971  |
| C | -5.138784463 | 2.428771419  | 1.595677272  |
| H | -5.997818715 | 2.799379768  | 2.145910870  |
| C | -4.009600337 | 3.204286302  | 1.494874430  |
| C | -2.913025858 | 2.675910783  | 0.771226294  |
| C | 0.260077105  | 3.104199416  | -0.344363336 |
| C | 1.399462692  | 2.624010248  | -1.101194455 |
| C | 1.312352693  | 1.572735179  | -2.033898054 |
| H | 0.358637628  | 1.104092499  | -2.243038999 |
| C | 2.428576618  | 1.152326953  | -2.733128422 |
| H | 2.313978850  | 0.349912285  | -3.450145693 |
| C | 3.694990635  | 1.760585032  | -2.534865811 |
| C | 3.768194332  | 2.832478789  | -1.608030714 |
| H | 4.707510541  | 3.340369164  | -1.430753679 |
| C | 2.646494698  | 3.249352042  | -0.915358137 |
| H | 2.721606540  | 4.070882232  | -0.211837106 |
| B | -0.966629253 | -4.577258725 | -1.017854817 |
| B | -1.586522061 | -1.088892338 | 0.562572863  |
| B | -1.587722219 | 1.088024138  | -0.562610149 |
| B | -0.970458443 | 4.577103126  | 1.017215333  |
| C | 6.075377790  | 2.025740569  | -3.062887961 |

|   |              |              |              |
|---|--------------|--------------|--------------|
| C | 4.697748120  | 0.253986969  | -4.192268735 |
| H | 6.827882708  | 1.542407120  | -3.686051286 |
| H | 6.009624500  | 3.079598124  | -3.365571008 |
| H | 6.427733213  | 1.992648899  | -2.024096823 |
| H | 5.687282053  | 0.030641297  | -4.591368538 |
| H | 4.306377744  | -0.661303399 | -3.732532120 |
| H | 4.043130833  | 0.519083710  | -5.033721242 |
| C | 4.698786408  | -0.251105260 | 4.192170747  |
| C | 6.077250019  | -2.022520907 | 3.063421732  |
| H | 5.688335433  | -0.026535807 | 4.590557294  |
| H | 4.306037801  | 0.663681061  | 3.732645718  |
| H | 4.045046957  | -0.516930041 | 5.034092460  |
| H | 6.829661220  | -1.538179449 | 3.685916520  |
| H | 6.011889379  | -3.076058315 | 3.367341926  |
| H | 6.429467750  | -1.990507572 | 2.024565843  |
| H | -3.928610182 | 4.189170625  | 1.937200997  |
| H | -3.925483581 | -4.191958664 | -1.936645002 |

**The ground states of (*P*)-2d optimized at B3LYP/6-31G(d,p) level.**

|    |              |              |              |
|----|--------------|--------------|--------------|
| Br | -5.154034849 | -0.008765368 | 1.931153814  |
| Br | -5.154082083 | 0.008830850  | -1.930974275 |
| F  | 1.481630134  | -4.974055517 | 1.588629573  |
| F  | 1.725095252  | -5.754473699 | -0.545972785 |
| F  | 2.145263369  | -0.689604497 | -2.075837885 |
| F  | 2.145665660  | 0.690235245  | 2.076466860  |
| F  | 1.724627533  | 5.754852273  | 0.544592018  |
| F  | 1.481505148  | 4.973018166  | -1.589536292 |
| O  | -0.007498705 | -4.174990468 | -0.118835902 |
| O  | 1.293434601  | -0.000014328 | 0.000523429  |
| O  | -0.007615404 | 4.174718418  | 0.118267118  |
| N  | 1.255432695  | -2.420581554 | -0.588272838 |
| N  | 2.161928250  | -3.374202963 | -0.123309754 |
| N  | 3.353895347  | -1.463557170 | -0.086635935 |
| N  | 3.353957980  | 1.463648575  | 0.086819270  |
| N  | 2.162067265  | 3.374395070  | 0.123464496  |
| N  | 1.255624103  | 2.420781091  | 0.588618951  |
| C  | -2.401435572 | -2.732208035 | -0.457873163 |
| H  | -2.409763943 | -3.613541789 | 0.173226915  |
| C  | -3.587193731 | -2.070608328 | -0.755746102 |
| H  | -4.530510281 | -2.415419356 | -0.351125222 |
| C  | -3.541106171 | -0.935904195 | -1.565838321 |

|   |              |              |              |
|---|--------------|--------------|--------------|
| C | -2.340062325 | -0.468797554 | -2.100788328 |
| H | -2.333043540 | 0.402341034  | -2.744915824 |
| C | -1.154749066 | -1.127761598 | -1.793125570 |
| H | -0.221110508 | -0.776562707 | -2.216903310 |
| C | -1.178005903 | -2.254530575 | -0.955117070 |
| C | 0.044814702  | -2.950208037 | -0.558755453 |
| C | 3.322195799  | -2.797251010 | 0.201168648  |
| C | 4.436779444  | -3.454412010 | 0.771057486  |
| H | 4.369983760  | -4.510047711 | 1.001444739  |
| C | 5.558286526  | -2.701681519 | 1.022606225  |
| H | 6.429950624  | -3.166909894 | 1.471418892  |
| C | 5.587008838  | -1.321744652 | 0.720750235  |
| H | 6.456934378  | -0.722500039 | 0.953984065  |
| C | 4.471070225  | -0.722500155 | 0.166732724  |
| C | 4.471097355  | 0.722542664  | -0.166522378 |
| C | 5.587042229  | 1.321703922  | -0.720602504 |
| H | 6.456943850  | 0.722418313  | -0.953815167 |
| C | 5.558382095  | 2.701650203  | -1.022483689 |
| H | 6.430053814  | 3.166818823  | -1.471339896 |
| C | 4.436917580  | 3.454429388  | -0.770912899 |
| H | 4.370205961  | 4.510096814  | -1.001188866 |
| C | 3.322281160  | 2.797305970  | -0.201048160 |
| C | 0.044896383  | 2.950126877  | 0.558652882  |
| C | -1.177872831 | 2.254385644  | 0.955092151  |
| C | -1.154653719 | 1.127791486  | 1.793300188  |
| H | -0.221053257 | 0.776654292  | 2.217217102  |
| C | -2.340004348 | 0.468875706  | 2.101015837  |
| H | -2.332994004 | -0.402155798 | 2.745285942  |
| C | -3.541003405 | 0.935876926  | 1.565927213  |
| C | -3.587071893 | 2.070430477  | 0.755610516  |
| H | -4.530364837 | 2.415131272  | 0.350866495  |
| C | -2.401304706 | 2.731960851  | 0.457685403  |
| H | -2.409582414 | 3.613190791  | -0.173556579 |
| B | 1.383999117  | -4.702876107 | 0.252021298  |
| B | 1.943976048  | -0.988479854 | -0.738081673 |
| B | 1.944052462  | 0.988740644  | 0.738604109  |
| B | 1.383893118  | 4.702719571  | -0.252763369 |

## References

- 1 H. Shimada, T. Sakurai, Y. Kitamura, H. Matsuura and T. Ihara, *Dalton Trans.*, 2013, **42**, 16006–16013.
- 2 P.-E. Doulain, C. Goze, E. Bodio, P. Richard and R. A. Decréau, *Chem. Commun.*, 2016, **52**, 4474–4477.
- 3 CrysAlisPro, Rigaku Oxford Diffraction, Tokyo, Japan. 2015.
- 4 G. M. Sheldrick, *Acta Cryst.*, 2015, **A71**, 3–8.
- 5 G. M. Sheldrick, *Acta Cryst.*, 2015, **C71**, 3–8.
- 6 O. V. Dolomanov, L. J. Bourhis, R. J. Gildea, J. A. K. Howard and H. Puschmann, *J. Appl. Cryst.*, 2009, **42**, 339–341.
